# Supplementary material
Source: publisher figshare collection journal article supplement (https://acs.figshare.com/ndownloader/files/3764431)
Supplement: Supplementary file 1 [file 3764431]

## Sheet: narK
Supporting Table S2. FACS-Seq data obtained from pET28aOPT-narKWT-OPT library.
Sequence	Start codon	1st codon	2nd codon	Count in gates	Weighted mean	P2 % of total	P3 % of total	P4 % of total	P5 % of total	P6 % of total	P7 % of total
TAGAGCATGAGTCAT	ATG	AGT	CAT	21	4.99	0	0	0	0	0	100
GTGGTTATGAGTCAT	ATG	AGT	CAT	9	4.99	0	0	0	0	0	100
TGGAGTATGTCACAC	ATG	TCA	CAC	6	4.99	0	0	0	0	0	100
TGTAAGATGAGCCAC	ATG	AGC	CAC	11	4.99	0	0	0	0	0	100
GAGTCTATGTCGCAC	ATG	TCG	CAC	8	4.99	0	0	0	0	0	100
GATTAGATGAGTCAC	ATG	AGT	CAC	8	4.99	0	0	0	0	0	100
AAAACCATGAGTCAT	ATG	AGT	CAT	9	4.99	0	0	0	0	0	100
GTAAGCATGTCGCAC	ATG	TCG	CAC	6	4.99	0	0	0	0	0	100
AGTAGTATGTCACAT	ATG	TCA	CAT	5	4.99	0	0	0	0	0	100
TCATGCATGTCCCAT	ATG	TCC	CAT	5	4.99	0	0	0	0	0	100
ACGTCGATGAGTCAC	ATG	AGT	CAC	6	4.99	0	0	0	0	0	100
TCGTGCATGTCCCAT	ATG	TCC	CAT	6	4.99	0	0	0	0	0	100
GTTGCAATGTCGCAC	ATG	TCG	CAC	1	4.99	0	0	0	0	0	100
TTAGATATGTCACAC	ATG	TCA	CAC	5	4.99	0	0	0	0	0	100
CGTAACATGTCGCAC	ATG	TCG	CAC	5	4.99	0	0	0	0	0	100
GAGGCGATGTCGCAC	ATG	TCG	CAC	4	4.99	0	0	0	0	0	100
AATGTTATGAGTCAT	ATG	AGT	CAT	3	4.99	0	0	0	0	0	100
GTGTTGATGAGCCAT	ATG	AGC	CAT	8	4.99	0	0	0	0	0	100
GCAGTAATGAGTCAT	ATG	AGT	CAT	4	4.99	0	0	0	0	0	100
CTTTTCATGTCGCAC	ATG	TCG	CAC	6	4.99	0	0	0	0	0	100
ACGTGCATGTCCCAC	ATG	TCC	CAC	2	4.99	0	0	0	0	0	100
AGAAACATGTCCCAT	ATG	TCC	CAT	4	4.99	0	0	0	0	0	100
GTTTATATGTCACAT	ATG	TCA	CAT	4	4.99	0	0	0	0	0	100
CATATCATGTCGCAC	ATG	TCG	CAC	4	4.99	0	0	0	0	0	100
TGGGAAATGAGTCCC	ATG	AGT	CCC	6	4.99	0	0	0	0	0	100
CTGCGGATGTCACAT	ATG	TCA	CAT	1	4.99	0	0	0	0	0	100
GGCAGAATGTCCCAT	ATG	TCC	CAT	7	4.99	0	0	0	0	0	100
CGAGGCATGTCACAC	ATG	TCA	CAC	8	4.99	0	0	0	0	0	100
TAAAAGATGAGCCAT	ATG	AGC	CAT	4	4.99	0	0	0	0	0	100
TGCCTGATGTCACAT	ATG	TCA	CAT	6	4.99	0	0	0	0	0	100
AAGCCTATGTCGCAT	ATG	TCG	CAT	7	4.99	0	0	0	0	0	100
AAGAGCATGTCGCAT	ATG	TCG	CAT	5	4.99	0	0	0	0	0	100
TTGTTTATGTCGCAT	ATG	TCG	CAT	2	4.99	0	0	0	0	0	100
ATATTCATGTCGCAT	ATG	TCG	CAT	4	4.99	0	0	0	0	0	100
GTTAGCATGTCGCAT	ATG	TCG	CAT	5	4.99	0	0	0	0	0	100
GTAGTCATGTCGCAC	ATG	TCG	CAC	3	4.99	0	0	0	0	0	100
TTTAGGATGTCTCAC	ATG	TCT	CAC	4	4.99	0	0	0	0	0	100
ATTCCCATGAGTCAT	ATG	AGT	CAT	7	4.99	0	0	0	0	0	100
ATCGATATGAGCCAT	ATG	AGC	CAT	1	4.99	0	0	0	0	0	100
CAATAAATGAGCCAC	ATG	AGC	CAC	4	4.99	0	0	0	0	0	100
TCAGTCATGTCGCAC	ATG	TCG	CAC	7	4.99	0	0	0	0	0	100
TGCATGATGAGTCAT	ATG	AGT	CAT	5	4.99	0	0	0	0	0	100
TGACGCATGTCTCAC	ATG	TCT	CAC	2	4.99	0	0	0	0	0	100
GAGGCTATGTCACAC	ATG	TCA	CAC	5	4.99	0	0	0	0	0	100
ATGGAGATGAGTCAT	ATG	AGT	CAT	5	4.99	0	0	0	0	0	100
CAGAGCATGTCGCGT	ATG	TCG	CGT	5	4.99	0	0	0	0	0	100
CTGGCAATGTCACAC	ATG	TCA	CAC	5	4.99	0	0	0	0	0	100
ATAGAAATGTCGCAC	ATG	TCG	CAC	3	4.99	0	0	0	0	0	100
ACGGTGATGAGTCAC	ATG	AGT	CAC	2	4.99	0	0	0	0	0	100
TAGGTGATGAGCCAT	ATG	AGC	CAT	5	4.99	0	0	0	0	0	100
AAGGCAATGAGTCAC	ATG	AGT	CAC	1	4.99	0	0	0	0	0	100
CGGAGCATGAGCCAT	ATG	AGC	CAT	6	4.99	0	0	0	0	0	100
CGTATTATGTCGCAC	ATG	TCG	CAC	2	4.99	0	0	0	0	0	100
AAGCGAATGAGCCAT	ATG	AGC	CAT	6	4.99	0	0	0	0	0	100
CTGGTTATGTCACAC	ATG	TCA	CAC	5	4.99	0	0	0	0	0	100
ATTTTCATGTCACAC	ATG	TCA	CAC	4	4.99	0	0	0	0	0	100
AGGTAGATGAGTCAT	ATG	AGT	CAT	2	4.99	0	0	0	0	0	100
TAGCGTATGAGCCAT	ATG	AGC	CAT	3	4.99	0	0	0	0	0	100
ATCGATATGTCGAAT	ATG	TCG	AAT	3	4.99	0	0	0	0	0	100
TCAGCTATGTCGCAT	ATG	TCG	CAT	3	4.99	0	0	0	0	0	100
GTTTATATGTCCCAC	ATG	TCC	CAC	6	4.99	0	0	0	0	0	100
GAGCCTATGAGTCAT	ATG	AGT	CAT	4	4.99	0	0	0	0	0	100
TTTGACATGAGTCAT	ATG	AGT	CAT	3	4.99	0	0	0	0	0	100
GTTCAAATGAGTCAT	ATG	AGT	CAT	2	4.99	0	0	0	0	0	100
AAACTCATGTCCCAT	ATG	TCC	CAT	5	4.99	0	0	0	0	0	100
GTTGCTATGAGTCAC	ATG	AGT	CAC	5	4.99	0	0	0	0	0	100
ATGGCGATGAGTCGT	ATG	AGT	CGT	1	4.99	0	0	0	0	0	100
GGGAAAATGAGTCAC	ATG	AGT	CAC	1	4.99	0	0	0	0	0	100
ATTTTTATGTCGCAT	ATG	TCG	CAT	2	4.99	0	0	0	0	0	100
TAGGCGATGAGTCAT	ATG	AGT	CAT	5	4.99	0	0	0	0	0	100
CGGCCGATGTCACAT	ATG	TCA	CAT	2	4.99	0	0	0	0	0	100
TCAGTAATGTCTCAT	ATG	TCT	CAT	3	4.99	0	0	0	0	0	100
GAAGTGATGTCCCAC	ATG	TCC	CAC	3	4.99	0	0	0	0	0	100
GTACTTATGTCGCAC	ATG	TCG	CAC	5	4.99	0	0	0	0	0	100
GGTTTTATGTCCCAC	ATG	TCC	CAC	1	4.99	0	0	0	0	0	100
TGCAGAATGTCCCAC	ATG	TCC	CAC	3	4.99	0	0	0	0	0	100
CTAATCATGAGCCAC	ATG	AGC	CAC	1	4.99	0	0	0	0	0	100
TTCCTGATGTCGCAC	ATG	TCG	CAC	2	4.99	0	0	0	0	0	100
ACTCCGATGTCGCAT	ATG	TCG	CAT	4	4.99	0	0	0	0	0	100
GTCACTATGTCACAC	ATG	TCA	CAC	2	4.99	0	0	0	0	0	100
ATCGTTATGTCCCAT	ATG	TCC	CAT	4	4.99	0	0	0	0	0	100
TGCTAGATGAGTCAT	ATG	AGT	CAT	3	4.99	0	0	0	0	0	100
TGGAGTATGAGCCAT	ATG	AGC	CAT	5	4.99	0	0	0	0	0	100
AAACCAATGAGCCAT	ATG	AGC	CAT	1	4.99	0	0	0	0	0	100
GTTGGCATGTCCTAT	ATG	TCC	TAT	3	4.99	0	0	0	0	0	100
TCACTCATGAGTCAC	ATG	AGT	CAC	3	4.99	0	0	0	0	0	100
TCGTCTATGTCCCAT	ATG	TCC	CAT	3	4.99	0	0	0	0	0	100
GGACGTATGTCACAC	ATG	TCA	CAC	3	4.99	0	0	0	0	0	100
ACATTAATGAGTCAT	ATG	AGT	CAT	3	4.99	0	0	0	0	0	100
GAGGCTATGTCGCCC	ATG	TCG	CCC	3	4.99	0	0	0	0	0	100
TTATACATGTCCCAT	ATG	TCC	CAT	1	4.99	0	0	0	0	0	100
TATGTGATGTCACAT	ATG	TCA	CAT	2	4.99	0	0	0	0	0	100
TATTTTATGTCACAT	ATG	TCA	CAT	1	4.99	0	0	0	0	0	100
GAGAGTATGTCCCAC	ATG	TCC	CAC	3	4.99	0	0	0	0	0	100
TCGTGAATGAGCCAT	ATG	AGC	CAT	4	4.99	0	0	0	0	0	100
GGAGTCATGTCACAT	ATG	TCA	CAT	2	4.99	0	0	0	0	0	100
TTTGCCATGTCTCAC	ATG	TCT	CAC	3	4.99	0	0	0	0	0	100
GTTAAGATGAGCCAT	ATG	AGC	CAT	1	4.99	0	0	0	0	0	100
GAGCCAATGAGCCAT	ATG	AGC	CAT	2	4.99	0	0	0	0	0	100
AGTGTTATGTCACAC	ATG	TCA	CAC	3	4.99	0	0	0	0	0	100
GTGCATATGTCCCAC	ATG	TCC	CAC	4	4.99	0	0	0	0	0	100
GATGGGATGAGTCAT	ATG	AGT	CAT	2	4.99	0	0	0	0	0	100
TTTTCGATGAGTCAT	ATG	AGT	CAT	3	4.99	0	0	0	0	0	100
AAGCTAATGAGCCAT	ATG	AGC	CAT	2	4.99	0	0	0	0	0	100
TTGGTCATGAGTCAT	ATG	AGT	CAT	1	4.99	0	0	0	0	0	100
TTTGTGATGAGCCAT	ATG	AGC	CAT	3	4.99	0	0	0	0	0	100
ATCGTCATGTCGCAC	ATG	TCG	CAC	2	4.99	0	0	0	0	0	100
AGTCGTATGTCGCAT	ATG	TCG	CAT	3	4.99	0	0	0	0	0	100
TACTTGATGTCACAT	ATG	TCA	CAT	2	4.99	0	0	0	0	0	100
TGGACGATGTCACAC	ATG	TCA	CAC	2	4.99	0	0	0	0	0	100
CTGCCGATGTCCCAC	ATG	TCC	CAC	4	4.99	0	0	0	0	0	100
GCATGCATGTCGCAC	ATG	TCG	CAC	2	4.99	0	0	0	0	0	100
GTAGTAATGAGTCAC	ATG	AGT	CAC	1	4.99	0	0	0	0	0	100
TTCCTCATGTCACAT	ATG	TCA	CAT	3	4.99	0	0	0	0	0	100
ACTTCGATGTCGCGT	ATG	TCG	CGT	4	4.99	0	0	0	0	0	100
CTACGCATGAGTCAC	ATG	AGT	CAC	2	4.99	0	0	0	0	0	100
GTTGCAATGTCGCAT	ATG	TCG	CAT	2	4.99	0	0	0	0	0	100
ATAGAGATGTCGCAC	ATG	TCG	CAC	1	4.99	0	0	0	0	0	100
ACCTAGATGAGTCAC	ATG	AGT	CAC	4	4.99	0	0	0	0	0	100
CTCGAAATGTCGCAC	ATG	TCG	CAC	5	4.99	0	0	0	0	0	100
GGGCCCATGAGTCAC	ATG	AGT	CAC	4	4.99	0	0	0	0	0	100
AGAAGCATGTCTCAC	ATG	TCT	CAC	3	4.99	0	0	0	0	0	100
AGAGACATGAGTCAT	ATG	AGT	CAT	3	4.99	0	0	0	0	0	100
TGAAGGATGTCGCAT	ATG	TCG	CAT	2	4.99	0	0	0	0	0	100
GAGGGAATGTCCCAC	ATG	TCC	CAC	4	4.99	0	0	0	0	0	100
ACGTATATGTCGCAT	ATG	TCG	CAT	2	4.99	0	0	0	0	0	100
AAACGCATGTCACAT	ATG	TCA	CAT	1	4.99	0	0	0	0	0	100
CCTTCAATGTCACAT	ATG	TCA	CAT	5	4.99	0	0	0	0	0	100
ATATGCATGAGTCAT	ATG	AGT	CAT	2	4.99	0	0	0	0	0	100
CTGGCTATGTCCCAC	ATG	TCC	CAC	1	4.99	0	0	0	0	0	100
CTTCCGATGAGTCAT	ATG	AGT	CAT	3	4.99	0	0	0	0	0	100
GAGGCTATGTCGCGC	ATG	TCG	CGC	3	4.99	0	0	0	0	0	100
ATTGGCATGTCACAT	ATG	TCA	CAT	4	4.99	0	0	0	0	0	100
GCGAATATGAGTCAC	ATG	AGT	CAC	3	4.99	0	0	0	0	0	100
CGCGGCATGTCTCAC	ATG	TCT	CAC	1	4.99	0	0	0	0	0	100
TGTACCATGAGTCAC	ATG	AGT	CAC	2	4.99	0	0	0	0	0	100
GTAGAGATGTCGCAC	ATG	TCG	CAC	1	4.99	0	0	0	0	0	100
CAGATAATGAGCCAT	ATG	AGC	CAT	4	4.99	0	0	0	0	0	100
GAGTGCATGAGCCAG	ATG	AGC	CAG	2	4.99	0	0	0	0	0	100
GACTACATGAGTCAT	ATG	AGT	CAT	5	4.99	0	0	0	0	0	100
GTCATGATGTCCCAC	ATG	TCC	CAC	1	4.99	0	0	0	0	0	100
ATTGTTATGTCGCAT	ATG	TCG	CAT	2	4.99	0	0	0	0	0	100
GTACCCATGTCACAT	ATG	TCA	CAT	1	4.99	0	0	0	0	0	100
TGGTGAATGAGCCAT	ATG	AGC	CAT	1	4.99	0	0	0	0	0	100
CGTGACATGAGTCAT	ATG	AGT	CAT	2	4.99	0	0	0	0	0	100
CGGTACATGTCGCAT	ATG	TCG	CAT	5	4.99	0	0	0	0	0	100
CCCGTCATGTCGCAC	ATG	TCG	CAC	3	4.99	0	0	0	0	0	100
TGTGAGATGTCACAT	ATG	TCA	CAT	4	4.99	0	0	0	0	0	100
CAGAGCATGTCGCAG	ATG	TCG	CAG	2	4.99	0	0	0	0	0	100
TGCTAGATGAGTCAC	ATG	AGT	CAC	2	4.99	0	0	0	0	0	100
TTTTGCATGAGTCAT	ATG	AGT	CAT	3	4.99	0	0	0	0	0	100
AAATGAATGAGTCAT	ATG	AGT	CAT	3	4.99	0	0	0	0	0	100
GCTGTTATGTCGCAC	ATG	TCG	CAC	4	4.99	0	0	0	0	0	100
TCGTTCATGAGCCAT	ATG	AGC	CAT	2	4.99	0	0	0	0	0	100
GAAGGAATGAGTCAT	ATG	AGT	CAT	1	4.99	0	0	0	0	0	100
GACACTATGTCCCAC	ATG	TCC	CAC	2	4.99	0	0	0	0	0	100
GCGTGGATGTCACAC	ATG	TCA	CAC	2	4.99	0	0	0	0	0	100
ATGGCGATGTCCCAT	ATG	TCC	CAT	3	4.99	0	0	0	0	0	100
TGCGGTATGTCATAT	ATG	TCA	TAT	2	4.99	0	0	0	0	0	100
GCTATCATGAGTCAC	ATG	AGT	CAC	1	4.99	0	0	0	0	0	100
GGAAGTATGAGCCAC	ATG	AGC	CAC	3	4.99	0	0	0	0	0	100
TCTTGCATGTCGCAG	ATG	TCG	CAG	3	4.99	0	0	0	0	0	100
ATCGTAATGTCGCAT	ATG	TCG	CAT	1	4.99	0	0	0	0	0	100
GACCGGATGAGTCAT	ATG	AGT	CAT	2	4.99	0	0	0	0	0	100
ACGCAAATGTCGCAT	ATG	TCG	CAT	4	4.99	0	0	0	0	0	100
CCGCAGATGTCACAT	ATG	TCA	CAT	2	4.99	0	0	0	0	0	100
TAGCTTATGAGCCAT	ATG	AGC	CAT	2	4.99	0	0	0	0	0	100
CTACTCATGTCCCAC	ATG	TCC	CAC	2	4.99	0	0	0	0	0	100
TGTTCCATGTCGCAC	ATG	TCG	CAC	1	4.99	0	0	0	0	0	100
TTGGCTATGTCGCAC	ATG	TCG	CAC	1	4.99	0	0	0	0	0	100
TGGCTAATGTCGCAT	ATG	TCG	CAT	1	4.99	0	0	0	0	0	100
TAGGCTATGTCCTAC	ATG	TCC	TAC	3	4.99	0	0	0	0	0	100
ATCGGCATGAGTCAT	ATG	AGT	CAT	3	4.99	0	0	0	0	0	100
GGGCTTATGTCACAT	ATG	TCA	CAT	2	4.99	0	0	0	0	0	100
GATAGTATGTCACAT	ATG	TCA	CAT	2	4.99	0	0	0	0	0	100
GCACGCATGTCGCGC	ATG	TCG	CGC	2	4.99	0	0	0	0	0	100
GCGGACATGTCGCAT	ATG	TCG	CAT	3	4.99	0	0	0	0	0	100
TGTGCAATGTCGCAT	ATG	TCG	CAT	1	4.99	0	0	0	0	0	100
ACGGTGATGTCCCAT	ATG	TCC	CAT	2	4.99	0	0	0	0	0	100
TTCACTATGTCCCAC	ATG	TCC	CAC	3	4.99	0	0	0	0	0	100
TGGGTAATGTCCCAC	ATG	TCC	CAC	1	4.99	0	0	0	0	0	100
TCGGCAATGTCCCAC	ATG	TCC	CAC	3	4.99	0	0	0	0	0	100
CGGGGAATGTCGTAT	ATG	TCG	TAT	1	4.99	0	0	0	0	0	100
TTGTGTATGTCCCAC	ATG	TCC	CAC	1	4.99	0	0	0	0	0	100
CCCGGGATGAGTCAC	ATG	AGT	CAC	2	4.99	0	0	0	0	0	100
AGAAATATGAGTCAC	ATG	AGT	CAC	2	4.99	0	0	0	0	0	100
GGTCTTATGAGCCAC	ATG	AGC	CAC	1	4.99	0	0	0	0	0	100
ATGGTGATGTCGCAC	ATG	TCG	CAC	1	4.99	0	0	0	0	0	100
GAGGAGATGTCCCAT	ATG	TCC	CAT	1	4.99	0	0	0	0	0	100
TATAGCATGAGTCAC	ATG	AGT	CAC	2	4.99	0	0	0	0	0	100
GTCTGGATGTCACAT	ATG	TCA	CAT	1	4.99	0	0	0	0	0	100
AATGTTATGAGTCAC	ATG	AGT	CAC	2	4.99	0	0	0	0	0	100
CGGATCATGAGTCAC	ATG	AGT	CAC	2	4.99	0	0	0	0	0	100
TGCCGAATGTCGCAC	ATG	TCG	CAC	4	4.99	0	0	0	0	0	100
TTCTCGATGTCTCAT	ATG	TCT	CAT	1	4.99	0	0	0	0	0	100
TGTGTGATGAGTCAT	ATG	AGT	CAT	1	4.99	0	0	0	0	0	100
GTAGGCATGAGTCAT	ATG	AGT	CAT	2	4.99	0	0	0	0	0	100
TATAGTATGTCCCAT	ATG	TCC	CAT	3	4.99	0	0	0	0	0	100
GCGTATATGTCGCAT	ATG	TCG	CAT	3	4.99	0	0	0	0	0	100
AAGCTCATGTCCCAT	ATG	TCC	CAT	1	4.99	0	0	0	0	0	100
CGATTTATGTCACAC	ATG	TCA	CAC	2	4.99	0	0	0	0	0	100
CAGCCAATGAGCCAT	ATG	AGC	CAT	2	4.99	0	0	0	0	0	100
TAAACGATGAGTCAC	ATG	AGT	CAC	2	4.99	0	0	0	0	0	100
GACCTGATGTCGCAC	ATG	TCG	CAC	1	4.99	0	0	0	0	0	100
GCTGCAATGAGTCAC	ATG	AGT	CAC	2	4.99	0	0	0	0	0	100
GCATGCATGTCACAT	ATG	TCA	CAT	2	4.99	0	0	0	0	0	100
GGGCTAATGTCACAT	ATG	TCA	CAT	2	4.99	0	0	0	0	0	100
AGTAAGATGAGTCAT	ATG	AGT	CAT	2	4.99	0	0	0	0	0	100
GTCCTCATGTCGCAC	ATG	TCG	CAC	3	4.99	0	0	0	0	0	100
TTAGCTATGTCGCGT	ATG	TCG	CGT	3	4.99	0	0	0	0	0	100
CTAGGCATGAGCCAC	ATG	AGC	CAC	1	4.99	0	0	0	0	0	100
TAGCTGATGTCGCAC	ATG	TCG	CAC	2	4.99	0	0	0	0	0	100
AAGGCCATGTCCCAC	ATG	TCC	CAC	1	4.99	0	0	0	0	0	100
CAGTCAATGAGTCAC	ATG	AGT	CAC	1	4.99	0	0	0	0	0	100
TTGCATATGTCACAT	ATG	TCA	CAT	1	4.99	0	0	0	0	0	100
ACTTCGATGTCCCAC	ATG	TCC	CAC	4	4.99	0	0	0	0	0	100
TTTGTTATGAGCCAC	ATG	AGC	CAC	2	4.99	0	0	0	0	0	100
CTCGTTATGAGCCAC	ATG	AGC	CAC	4	4.99	0	0	0	0	0	100
GTCGGGATGTCCCAT	ATG	TCC	CAT	2	4.99	0	0	0	0	0	100
AATTCGATGTCGCAT	ATG	TCG	CAT	2	4.99	0	0	0	0	0	100
TTTCAGATGTCCCAC	ATG	TCC	CAC	1	4.99	0	0	0	0	0	100
TGTAGCATGTCACAC	ATG	TCA	CAC	2	4.99	0	0	0	0	0	100
ACCCCGATGAGCCAC	ATG	AGC	CAC	3	4.99	0	0	0	0	0	100
TTCTCTATGAGTCAC	ATG	AGT	CAC	2	4.99	0	0	0	0	0	100
ATATTCATGTCCCAC	ATG	TCC	CAC	3	4.99	0	0	0	0	0	100
GAGTGTATGTCGCAC	ATG	TCG	CAC	3	4.99	0	0	0	0	0	100
CTTGTCATGTCGCAT	ATG	TCG	CAT	2	4.99	0	0	0	0	0	100
GGCTGCATGTCGCAC	ATG	TCG	CAC	2	4.99	0	0	0	0	0	100
CGCAGTATGAGTCAT	ATG	AGT	CAT	2	4.99	0	0	0	0	0	100
GGGCGCATGTCACAC	ATG	TCA	CAC	3	4.99	0	0	0	0	0	100
TTCCATATGAGTCAT	ATG	AGT	CAT	3	4.99	0	0	0	0	0	100
GTGTCAATGTCTCAT	ATG	TCT	CAT	1	4.99	0	0	0	0	0	100
TTCGCTATGTCCCAC	ATG	TCC	CAC	3	4.99	0	0	0	0	0	100
GCTGTAATGAGCCAT	ATG	AGC	CAT	3	4.99	0	0	0	0	0	100
GCAGTTATGAGCCAC	ATG	AGC	CAC	3	4.99	0	0	0	0	0	100
AAGTGAATGAGCCAT	ATG	AGC	CAT	2	4.99	0	0	0	0	0	100
TCTCGCATGTCGCAT	ATG	TCG	CAT	2	4.99	0	0	0	0	0	100
TGACAGATGTCACAT	ATG	TCA	CAT	1	4.99	0	0	0	0	0	100
TTGATCATGAGCCAC	ATG	AGC	CAC	2	4.99	0	0	0	0	0	100
GAGGGTATGAGCCAC	ATG	AGC	CAC	3	4.99	0	0	0	0	0	100
TCTCAGATGTCACAT	ATG	TCA	CAT	2	4.99	0	0	0	0	0	100
AGGAAAATGAGCCAT	ATG	AGC	CAT	3	4.99	0	0	0	0	0	100
TCAGCGATGTCGCAT	ATG	TCG	CAT	3	4.99	0	0	0	0	0	100
CTGTTTATGTCACAT	ATG	TCA	CAT	3	4.99	0	0	0	0	0	100
TCACACATGTCGCAT	ATG	TCG	CAT	2	4.99	0	0	0	0	0	100
CACGGCATGTCCCAC	ATG	TCC	CAC	2	4.99	0	0	0	0	0	100
ATGTGTATGAGTCAC	ATG	AGT	CAC	2	4.99	0	0	0	0	0	100
TAGGTCATGTCTCAT	ATG	TCT	CAT	1	4.99	0	0	0	0	0	100
CACGGTATGTCACAC	ATG	TCA	CAC	3	4.99	0	0	0	0	0	100
ATTTGTATGTCTCAT	ATG	TCT	CAT	2	4.99	0	0	0	0	0	100
TGGCGTATGTCCCAC	ATG	TCC	CAC	1	4.99	0	0	0	0	0	100
GAGGTCATGTCGCAT	ATG	TCG	CAT	1	4.99	0	0	0	0	0	100
CAGTACATGTCGCAC	ATG	TCG	CAC	3	4.99	0	0	0	0	0	100
GTTTATATGTCGCAG	ATG	TCG	CAG	1	4.99	0	0	0	0	0	100
GGTCGCATGTCTCAC	ATG	TCT	CAC	1	4.99	0	0	0	0	0	100
AACTGTATGAGTCAC	ATG	AGT	CAC	2	4.99	0	0	0	0	0	100
TGTCAAATGAGTCAT	ATG	AGT	CAT	3	4.99	0	0	0	0	0	100
AATGGTATGTCGCAC	ATG	TCG	CAC	1	4.99	0	0	0	0	0	100
GCGAATATGAGCCAT	ATG	AGC	CAT	4	4.99	0	0	0	0	0	100
AGGAAAATGTCACAT	ATG	TCA	CAT	1	4.99	0	0	0	0	0	100
TATAAGATGAGTCAT	ATG	AGT	CAT	1	4.99	0	0	0	0	0	100
AAGTGCATGAGCCAT	ATG	AGC	CAT	3	4.99	0	0	0	0	0	100
TACTCCATGTCCCAC	ATG	TCC	CAC	2	4.99	0	0	0	0	0	100
AGGGTTATGTCACAC	ATG	TCA	CAC	1	4.99	0	0	0	0	0	100
GTGTAGATGTCACAC	ATG	TCA	CAC	2	4.99	0	0	0	0	0	100
TGAAATATGAGTCAT	ATG	AGT	CAT	3	4.99	0	0	0	0	0	100
GATAGTATGTCCCAG	ATG	TCC	CAG	2	4.99	0	0	0	0	0	100
CCAGGCATGTCCCAC	ATG	TCC	CAC	2	4.99	0	0	0	0	0	100
TCTTGCATGTCCCAC	ATG	TCC	CAC	2	4.99	0	0	0	0	0	100
TTTGTTATGTCACAT	ATG	TCA	CAT	3	4.99	0	0	0	0	0	100
GCAAGTATGTCCCAT	ATG	TCC	CAT	3	4.99	0	0	0	0	0	100
CCAGGTATGAGCCAC	ATG	AGC	CAC	1	4.99	0	0	0	0	0	100
TTTGCCATGAGCCAT	ATG	AGC	CAT	3	4.99	0	0	0	0	0	100
TGTGCGATGTCGCAT	ATG	TCG	CAT	3	4.99	0	0	0	0	0	100
GTTTCCATGAGTCAT	ATG	AGT	CAT	2	4.99	0	0	0	0	0	100
TGCCGCATGTCACAC	ATG	TCA	CAC	2	4.99	0	0	0	0	0	100
TTTAGCATGTCGCAT	ATG	TCG	CAT	3	4.99	0	0	0	0	0	100
GCACGCATGTCCCAC	ATG	TCC	CAC	3	4.99	0	0	0	0	0	100
AAGCCTATGTCTCAC	ATG	TCT	CAC	4	4.99	0	0	0	0	0	100
TCTCCAATGAGTCAC	ATG	AGT	CAC	2	4.99	0	0	0	0	0	100
AGAAACATGTCGCAG	ATG	TCG	CAG	3	4.99	0	0	0	0	0	100
AAAAACATGTCGCAT	ATG	TCG	CAT	3	4.99	0	0	0	0	0	100
ACGCCTATGAGTCAC	ATG	AGT	CAC	3	4.99	0	0	0	0	0	100
AAACTCATGTCGCAT	ATG	TCG	CAT	2	4.99	0	0	0	0	0	100
AGCTTAATGAGTCAC	ATG	AGT	CAC	1	4.99	0	0	0	0	0	100
TCAGTAATGTCGCAC	ATG	TCG	CAC	3	4.99	0	0	0	0	0	100
CTTTTCATGTCACAT	ATG	TCA	CAT	2	4.99	0	0	0	0	0	100
CAGCGTATGAGCCAT	ATG	AGC	CAT	2	4.99	0	0	0	0	0	100
ATACCCATGAGTCAC	ATG	AGT	CAC	2	4.99	0	0	0	0	0	100
TTGTTCATGTCACAT	ATG	TCA	CAT	4	4.99	0	0	0	0	0	100
CTACCGATGAGCCAT	ATG	AGC	CAT	2	4.99	0	0	0	0	0	100
ATAGGAATGAGTCAC	ATG	AGT	CAC	1	4.99	0	0	0	0	0	100
GGTATAATGTCTCAC	ATG	TCT	CAC	1	4.99	0	0	0	0	0	100
TATGGAATGAGTCAT	ATG	AGT	CAT	2	4.99	0	0	0	0	0	100
ATCGATATGTCGTAT	ATG	TCG	TAT	3	4.99	0	0	0	0	0	100
ATGGTTATGAGCCAC	ATG	AGC	CAC	1	4.99	0	0	0	0	0	100
GTTGTGATGAGTCAT	ATG	AGT	CAT	1	4.99	0	0	0	0	0	100
TCAGGAATGTCGCAT	ATG	TCG	CAT	1	4.99	0	0	0	0	0	100
TTCTATATGAGTCAC	ATG	AGT	CAC	1	4.99	0	0	0	0	0	100
CGATTTATGTCGCCC	ATG	TCG	CCC	1	4.99	0	0	0	0	0	100
AAGATTATGTCCCAT	ATG	TCC	CAT	1	4.99	0	0	0	0	0	100
GCCTGTATGTCCCAT	ATG	TCC	CAT	1	4.99	0	0	0	0	0	100
CTATGGATGTCTCAT	ATG	TCT	CAT	1	4.99	0	0	0	0	0	100
CTGGCCATGAGCCAC	ATG	AGC	CAC	1	4.99	0	0	0	0	0	100
GAAGTAATGAGTCAC	ATG	AGT	CAC	1	4.99	0	0	0	0	0	100
TAAAACATGAGTCAC	ATG	AGT	CAC	1	4.99	0	0	0	0	0	100
AGGAGTATGAGTCAC	ATG	AGT	CAC	1	4.99	0	0	0	0	0	100
CGTTACATGTCGCAC	ATG	TCG	CAC	1	4.99	0	0	0	0	0	100
AAGACGATGTCACAC	ATG	TCA	CAC	3	4.99	0	0	0	0	0	100
GAAGTTATGAGTCAT	ATG	AGT	CAT	3	4.99	0	0	0	0	0	100
ACTTCGATGTCACAC	ATG	TCA	CAC	2	4.99	0	0	0	0	0	100
AGCGGAATGTCACAC	ATG	TCA	CAC	1	4.99	0	0	0	0	0	100
TGTCAGATGTCAAAT	ATG	TCA	AAT	3	4.99	0	0	0	0	0	100
GTGCTCATGTCACAC	ATG	TCA	CAC	1	4.99	0	0	0	0	0	100
GGGAGAATGTCACAT	ATG	TCA	CAT	2	4.99	0	0	0	0	0	100
TTGGCTATGTCGCAG	ATG	TCG	CAG	1	4.99	0	0	0	0	0	100
CAGCGTATGAGTCAC	ATG	AGT	CAC	1	4.99	0	0	0	0	0	100
GTTGTCATGAGTCAT	ATG	AGT	CAT	1	4.99	0	0	0	0	0	100
GACATGATGAGCCAC	ATG	AGC	CAC	1	4.99	0	0	0	0	0	100
GAGGGGATGTCACAT	ATG	TCA	CAT	1	4.99	0	0	0	0	0	100
AAGGTGATGAGCCAG	ATG	AGC	CAG	3	4.99	0	0	0	0	0	100
GTATATATGTCGCAT	ATG	TCG	CAT	1	4.99	0	0	0	0	0	100
GTTACCATGAGCCAT	ATG	AGC	CAT	1	4.99	0	0	0	0	0	100
TCATTTATGTCCCAC	ATG	TCC	CAC	1	4.99	0	0	0	0	0	100
GCTTTGATGAGCCAT	ATG	AGC	CAT	1	4.99	0	0	0	0	0	100
GAGTACATGAGTCAT	ATG	AGT	CAT	1	4.99	0	0	0	0	0	100
ACATGGATGAGTCAT	ATG	AGT	CAT	1	4.99	0	0	0	0	0	100
CAGTGCATGTCCCAT	ATG	TCC	CAT	2	4.99	0	0	0	0	0	100
TGGGCAATGAGCCAC	ATG	AGC	CAC	2	4.99	0	0	0	0	0	100
GTGCGAATGAGTCAT	ATG	AGT	CAT	1	4.99	0	0	0	0	0	100
CAGCGAATGAGTCAA	ATG	AGT	CAA	2	4.99	0	0	0	0	0	100
GGCTCTATGTCTCAC	ATG	TCT	CAC	1	4.99	0	0	0	0	0	100
TGCGTGATGTCATAT	ATG	TCA	TAT	2	4.99	0	0	0	0	0	100
AGTAGCATGTCGCAC	ATG	TCG	CAC	3	4.99	0	0	0	0	0	100
GTTTGTATGAGCCAT	ATG	AGC	CAT	1	4.99	0	0	0	0	0	100
ATAGATATGTCTCAT	ATG	TCT	CAT	1	4.99	0	0	0	0	0	100
ATGAGTATGAGTCAT	ATG	AGT	CAT	2	4.99	0	0	0	0	0	100
TAGGTGATGAGTAAT	ATG	AGT	AAT	3	4.99	0	0	0	0	0	100
GCTCTGATGAGTCAC	ATG	AGT	CAC	1	4.99	0	0	0	0	0	100
GTGCTTATGTCGCGC	ATG	TCG	CGC	1	4.99	0	0	0	0	0	100
ACATGTATGAGTCAT	ATG	AGT	CAT	1	4.99	0	0	0	0	0	100
CAGAACATGTCGCAC	ATG	TCG	CAC	1	4.99	0	0	0	0	0	100
GTAAGCATGTCCCAC	ATG	TCC	CAC	1	4.99	0	0	0	0	0	100
AGGAAGATGTCACAC	ATG	TCA	CAC	1	4.99	0	0	0	0	0	100
CCAGTCATGTCACAT	ATG	TCA	CAT	3	4.99	0	0	0	0	0	100
TCCTATATGAGTCAC	ATG	AGT	CAC	1	4.99	0	0	0	0	0	100
TTGTGCATGTCGCCT	ATG	TCG	CCT	3	4.99	0	0	0	0	0	100
GGGAAAATGTCACAT	ATG	TCA	CAT	2	4.99	0	0	0	0	0	100
CCTCTTATGTCACAT	ATG	TCA	CAT	2	4.99	0	0	0	0	0	100
GCGTGTATGAGCCCT	ATG	AGC	CCT	2	4.99	0	0	0	0	0	100
ATGGCAATGAGCCAT	ATG	AGC	CAT	2	4.99	0	0	0	0	0	100
CTAGACATGAGCCAT	ATG	AGC	CAT	2	4.99	0	0	0	0	0	100
ACGCGCATGTCACAC	ATG	TCA	CAC	2	4.99	0	0	0	0	0	100
TAGGAGATGTCCCAT	ATG	TCC	CAT	1	4.99	0	0	0	0	0	100
ACGTAGATGTCCCAT	ATG	TCC	CAT	2	4.99	0	0	0	0	0	100
TTGAAAATGAGTCAT	ATG	AGT	CAT	3	4.99	0	0	0	0	0	100
GTGGACATGAGTCAT	ATG	AGT	CAT	1	4.99	0	0	0	0	0	100
TCGTGCATGTCCCAC	ATG	TCC	CAC	2	4.99	0	0	0	0	0	100
TTTTATATGTCACAT	ATG	TCA	CAT	2	4.99	0	0	0	0	0	100
TCAGTGATGTCCTAT	ATG	TCC	TAT	3	4.99	0	0	0	0	0	100
ATCGCGATGAGTCAC	ATG	AGT	CAC	3	4.99	0	0	0	0	0	100
ATGGCTATGAGTCAT	ATG	AGT	CAT	2	4.99	0	0	0	0	0	100
TCCCGGATGAGTCAT	ATG	AGT	CAT	1	4.99	0	0	0	0	0	100
TTTATGATGTCACAC	ATG	TCA	CAC	3	4.99	0	0	0	0	0	100
TCGAGGATGCGTCAC	ATG	CGT	CAC	1594	3.98	67.2456	8.68862	6.44004	8.19287	5.85635	3.57649
GACGGAATGTCCCAC	ATG	TCC	CAC	2	4.99	0	0	0	0	0	100
AAGCTTATGAGCCCT	ATG	AGC	CCT	2	4.99	0	0	0	0	0	100
AGTGACATGAGCCAT	ATG	AGC	CAT	2	4.99	0	0	0	0	0	100
AGTTATATGTCACAC	ATG	TCA	CAC	2	4.99	0	0	0	0	0	100
AGTTATATGTCACAT	ATG	TCA	CAT	3	4.99	0	0	0	0	0	100
AGATAAATGTCCCAC	ATG	TCC	CAC	1	4.99	0	0	0	0	0	100
GAGAGAATGTCCCAC	ATG	TCC	CAC	3	4.99	0	0	0	0	0	100
GGTCAAATGAGCCAC	ATG	AGC	CAC	2	4.99	0	0	0	0	0	100
TTAGCTATGTCGAAT	ATG	TCG	AAT	1	4.99	0	0	0	0	0	100
TTCTCGATGTCTCAC	ATG	TCT	CAC	1	4.99	0	0	0	0	0	100
GCCAAGATGTCTCAC	ATG	TCT	CAC	1	4.99	0	0	0	0	0	100
GCCGTAATGAGTCAC	ATG	AGT	CAC	2	4.99	0	0	0	0	0	100
TTGGTTATGAGCCAC	ATG	AGC	CAC	3	4.99	0	0	0	0	0	100
ACATGCATGAGTCAT	ATG	AGT	CAT	2	4.99	0	0	0	0	0	100
CCCCGCATGAGCCAT	ATG	AGC	CAT	2	4.99	0	0	0	0	0	100
CAGAGTATGTCCCAC	ATG	TCC	CAC	2	4.99	0	0	0	0	0	100
AACCTAATGAGCCAC	ATG	AGC	CAC	1	4.99	0	0	0	0	0	100
CAGGTTATGAGTCAT	ATG	AGT	CAT	1	4.99	0	0	0	0	0	100
TAGCGGATGTCACAT	ATG	TCA	CAT	3	4.99	0	0	0	0	0	100
GTTTACATGTCCCAT	ATG	TCC	CAT	1	4.99	0	0	0	0	0	100
GACTGAATGTCGCAC	ATG	TCG	CAC	1	4.99	0	0	0	0	0	100
TTGGGTATGAGTCAT	ATG	AGT	CAT	1	4.99	0	0	0	0	0	100
CTGCCAATGTCGCAT	ATG	TCG	CAT	2	4.99	0	0	0	0	0	100
GCCGCGATGTCACAT	ATG	TCA	CAT	1	4.99	0	0	0	0	0	100
CGAATCATGTCGCAC	ATG	TCG	CAC	3	4.99	0	0	0	0	0	100
TAGGTGATGAGCCAC	ATG	AGC	CAC	2	4.99	0	0	0	0	0	100
TTTGGCATGAGTCGT	ATG	AGT	CGT	1	4.99	0	0	0	0	0	100
TTAGAAATGTCCCAC	ATG	TCC	CAC	1	4.99	0	0	0	0	0	100
TACTCAATGTCGCAT	ATG	TCG	CAT	1	4.99	0	0	0	0	0	100
GATGCCATGTCCCGT	ATG	TCC	CGT	2	4.99	0	0	0	0	0	100
TGCGTCATGTCTCAT	ATG	TCT	CAT	2	4.99	0	0	0	0	0	100
TGAGTCATGTCACAT	ATG	TCA	CAT	1	4.99	0	0	0	0	0	100
TGCGAAATGTCTCAT	ATG	TCT	CAT	2	4.99	0	0	0	0	0	100
CGTAGGATGTCGCAC	ATG	TCG	CAC	2	4.99	0	0	0	0	0	100
GCGCTGATGTCGTAT	ATG	TCG	TAT	3	4.99	0	0	0	0	0	100
AAGCCGATGAGCCAT	ATG	AGC	CAT	2	4.99	0	0	0	0	0	100
CAGTTGATGAGTCAT	ATG	AGT	CAT	1	4.99	0	0	0	0	0	100
TCTGACATGAGTCAC	ATG	AGT	CAC	1	4.99	0	0	0	0	0	100
TGACGGATGTCTCAC	ATG	TCT	CAC	1	4.99	0	0	0	0	0	100
GAGGCCATGTCGCAT	ATG	TCG	CAT	3	4.99	0	0	0	0	0	100
GAGGTTATGAGTCAC	ATG	AGT	CAC	1	4.99	0	0	0	0	0	100
GTCCTAATGTCGCAC	ATG	TCG	CAC	1	4.99	0	0	0	0	0	100
AAATCAATGAGTCAT	ATG	AGT	CAT	1	4.99	0	0	0	0	0	100
TCATGCATGTCGCAC	ATG	TCG	CAC	2	4.99	0	0	0	0	0	100
GGAGATATGAGCCAT	ATG	AGC	CAT	2	4.99	0	0	0	0	0	100
TTCGCTATGTCGCAC	ATG	TCG	CAC	3	4.99	0	0	0	0	0	100
ATAGGCATGAGCCAC	ATG	AGC	CAC	1	4.99	0	0	0	0	0	100
CGCGTCATGAGCCAC	ATG	AGC	CAC	1	4.99	0	0	0	0	0	100
TCGTGCATGAGCTAT	ATG	AGC	TAT	2	4.99	0	0	0	0	0	100
ATTTCCATGAGTCAT	ATG	AGT	CAT	1	4.99	0	0	0	0	0	100
TATGATATGTCCCAC	ATG	TCC	CAC	1	4.99	0	0	0	0	0	100
CCCTGGATGTCACAT	ATG	TCA	CAT	1	4.99	0	0	0	0	0	100
ACGCTTATGAGCCAC	ATG	AGC	CAC	1	4.99	0	0	0	0	0	100
TCACTCATGTCTCAT	ATG	TCT	CAT	1	4.99	0	0	0	0	0	100
GCTCTTATGTCACAT	ATG	TCA	CAT	2	4.99	0	0	0	0	0	100
TCGCCTATGAGTCAC	ATG	AGT	CAC	2	4.99	0	0	0	0	0	100
GGGCACATGAGTCAT	ATG	AGT	CAT	2	4.99	0	0	0	0	0	100
GGCCGCATGTCCCAC	ATG	TCC	CAC	1	4.99	0	0	0	0	0	100
GAGTCTATGTCTCAT	ATG	TCT	CAT	1	4.99	0	0	0	0	0	100
TTATAAATGAGTCAC	ATG	AGT	CAC	1	4.99	0	0	0	0	0	100
TCGGTTATGTCACAT	ATG	TCA	CAT	1	4.99	0	0	0	0	0	100
TTTTCGATGAGCCAT	ATG	AGC	CAT	1	4.99	0	0	0	0	0	100
TGCGACATGAGCCAC	ATG	AGC	CAC	2	4.99	0	0	0	0	0	100
TGCGACATGAGCCAT	ATG	AGC	CAT	2	4.99	0	0	0	0	0	100
TACTCTATGTCCCAC	ATG	TCC	CAC	1	4.99	0	0	0	0	0	100
GTGCCGATGAGTCAT	ATG	AGT	CAT	1	4.99	0	0	0	0	0	100
TACAAAATGAGCCAT	ATG	AGC	CAT	3	4.99	0	0	0	0	0	100
GAGGTAATGTCCCAC	ATG	TCC	CAC	1	4.99	0	0	0	0	0	100
TAGCATATGTCCCAC	ATG	TCC	CAC	2	4.99	0	0	0	0	0	100
ATGATTATGAGCCAT	ATG	AGC	CAT	2	4.99	0	0	0	0	0	100
GTGGACATGTCCCAT	ATG	TCC	CAT	1	4.99	0	0	0	0	0	100
TACCTGATGTCACAT	ATG	TCA	CAT	3	4.99	0	0	0	0	0	100
TCAGCTATGTCCCAT	ATG	TCC	CAT	1	4.99	0	0	0	0	0	100
TGTAATATGAGTCAT	ATG	AGT	CAT	2	4.99	0	0	0	0	0	100
TATGCCATGAGCCAC	ATG	AGC	CAC	2	4.99	0	0	0	0	0	100
AATGGGATGAGTCAC	ATG	AGT	CAC	2	4.99	0	0	0	0	0	100
ACATCGATGTCGCAT	ATG	TCG	CAT	1	4.99	0	0	0	0	0	100
CTTTTTATGAGCCAC	ATG	AGC	CAC	2	4.99	0	0	0	0	0	100
ATTACGATGTCGCAT	ATG	TCG	CAT	2	4.99	0	0	0	0	0	100
TGTGTGATGTCCCAT	ATG	TCC	CAT	1	4.99	0	0	0	0	0	100
ACATCAATGAGTCAC	ATG	AGT	CAC	3	4.99	0	0	0	0	0	100
GGCTGAATGTCCCAC	ATG	TCC	CAC	2	4.99	0	0	0	0	0	100
GGTATCATGAGCCAT	ATG	AGC	CAT	1	4.99	0	0	0	0	0	100
ACTGGTATGAGTCAT	ATG	AGT	CAT	2	4.99	0	0	0	0	0	100
ACTGGTATGAGTCAC	ATG	AGT	CAC	1	4.99	0	0	0	0	0	100
GTCACTATGTCTCAT	ATG	TCT	CAT	1	4.99	0	0	0	0	0	100
GGCGAGATGTCCCAC	ATG	TCC	CAC	1	4.99	0	0	0	0	0	100
GCCCTCATGTCCCAC	ATG	TCC	CAC	2	4.99	0	0	0	0	0	100
TATTGTATGAGCCAT	ATG	AGC	CAT	1	4.99	0	0	0	0	0	100
ACTAGAATGAGTCAC	ATG	AGT	CAC	1	4.99	0	0	0	0	0	100
TTTCTTATGAGTCAT	ATG	AGT	CAT	1	4.99	0	0	0	0	0	100
TTTTTCATGTCCCAC	ATG	TCC	CAC	1	4.99	0	0	0	0	0	100
GCGGGGATGAGCCAC	ATG	AGC	CAC	1	4.99	0	0	0	0	0	100
ATGTCCATGAGTCAT	ATG	AGT	CAT	1	4.99	0	0	0	0	0	100
TTAGATATGTCGCGC	ATG	TCG	CGC	2	4.99	0	0	0	0	0	100
AGATTTATGAGTCAC	ATG	AGT	CAC	2	4.99	0	0	0	0	0	100
AAGCAAATGAGCCAT	ATG	AGC	CAT	2	4.99	0	0	0	0	0	100
GGACGCATGTCACAT	ATG	TCA	CAT	1	4.99	0	0	0	0	0	100
AAGTGTATGAGTCAC	ATG	AGT	CAC	2	4.99	0	0	0	0	0	100
TCACGCATGTCCCAC	ATG	TCC	CAC	2	4.99	0	0	0	0	0	100
GCCCCCATGAGCCAT	ATG	AGC	CAT	3	4.99	0	0	0	0	0	100
AAAGTAATGTCACAC	ATG	TCA	CAC	1	4.99	0	0	0	0	0	100
TAATCAATGTCCCAC	ATG	TCC	CAC	1	4.99	0	0	0	0	0	100
TAGTCTATGTCTCAT	ATG	TCT	CAT	1	4.99	0	0	0	0	0	100
TATTCGATGTCACAT	ATG	TCA	CAT	2	4.99	0	0	0	0	0	100
GATTAGATGAGCCAT	ATG	AGC	CAT	3	4.99	0	0	0	0	0	100
TTTGCGATGTCTCAT	ATG	TCT	CAT	1	4.99	0	0	0	0	0	100
GCCGCTATGTCCCAC	ATG	TCC	CAC	2	4.99	0	0	0	0	0	100
TTACTAATGTCACAT	ATG	TCA	CAT	3	4.99	0	0	0	0	0	100
TGAATCATGAGTCAT	ATG	AGT	CAT	2	4.99	0	0	0	0	0	100
CAGGCGATGAGTCAT	ATG	AGT	CAT	3	4.99	0	0	0	0	0	100
GCACGAATGTCCCAC	ATG	TCC	CAC	1	4.99	0	0	0	0	0	100
CTTGTCATGAGCCAC	ATG	AGC	CAC	1	4.99	0	0	0	0	0	100
ATGACGATGAGTCAT	ATG	AGT	CAT	1	4.99	0	0	0	0	0	100
TGTATAATGTCGTAT	ATG	TCG	TAT	3	4.99	0	0	0	0	0	100
TGGTAGATGAGTCAG	ATG	AGT	CAG	1	4.99	0	0	0	0	0	100
AAGTCAATGAGCCAT	ATG	AGC	CAT	2	4.99	0	0	0	0	0	100
CTGCCAATGAGTCAC	ATG	AGT	CAC	1	4.99	0	0	0	0	0	100
TTCTTCATGTCTCAT	ATG	TCT	CAT	1	4.99	0	0	0	0	0	100
CAGGTCATGTCCCAC	ATG	TCC	CAC	2	4.99	0	0	0	0	0	100
CAGGATATGAGTCAC	ATG	AGT	CAC	1	4.99	0	0	0	0	0	100
CTGAGGATGTCACAC	ATG	TCA	CAC	1	4.99	0	0	0	0	0	100
GTGTTTATGAGTCAT	ATG	AGT	CAT	2	4.99	0	0	0	0	0	100
GCTTAAATGAGCCAC	ATG	AGC	CAC	1	4.99	0	0	0	0	0	100
CGGCTGATGTCACAT	ATG	TCA	CAT	2	4.99	0	0	0	0	0	100
CTAGAAATGTCTCAT	ATG	TCT	CAT	2	4.99	0	0	0	0	0	100
ATTCCAATGAGTCAT	ATG	AGT	CAT	2	4.99	0	0	0	0	0	100
GGTCAGATGAGTCAT	ATG	AGT	CAT	1	4.99	0	0	0	0	0	100
CGAGTAATGTCTCAC	ATG	TCT	CAC	1	4.99	0	0	0	0	0	100
TTTCGGATGTCACAC	ATG	TCA	CAC	2	4.99	0	0	0	0	0	100
CATCCCATGTCTCAT	ATG	TCT	CAT	1	4.99	0	0	0	0	0	100
CTTTTTATGAGCCAT	ATG	AGC	CAT	2	4.99	0	0	0	0	0	100
TAGTCTATGTCCCAT	ATG	TCC	CAT	2	4.99	0	0	0	0	0	100
CTAGTTATGAGTCAC	ATG	AGT	CAC	1	4.99	0	0	0	0	0	100
GTGAGCATGTCGCGT	ATG	TCG	CGT	2	4.99	0	0	0	0	0	100
ATTGGCATGTCACAC	ATG	TCA	CAC	2	4.99	0	0	0	0	0	100
GACGTCATGAGTCAT	ATG	AGT	CAT	1	4.99	0	0	0	0	0	100
TAGGGAATGTCTCAC	ATG	TCT	CAC	1	4.99	0	0	0	0	0	100
CACTGTATGTCACAT	ATG	TCA	CAT	2	4.99	0	0	0	0	0	100
TCTAGGATGTCACAC	ATG	TCA	CAC	3	4.99	0	0	0	0	0	100
TACGAAATGTCGTAT	ATG	TCG	TAT	2	4.99	0	0	0	0	0	100
TGCGAGATGAGCCAT	ATG	AGC	CAT	1	4.99	0	0	0	0	0	100
CTGCAGATGTCACAC	ATG	TCA	CAC	2	4.99	0	0	0	0	0	100
GTTTTTATGAGCCAC	ATG	AGC	CAC	2	4.99	0	0	0	0	0	100
TCCCTAATGTCGCAC	ATG	TCG	CAC	2	4.99	0	0	0	0	0	100
GGTAAGATGTCACTT	ATG	TCA	CTT	1	4.99	0	0	0	0	0	100
CCTTGTATGAGTCAT	ATG	AGT	CAT	2	4.99	0	0	0	0	0	100
ATTGTAATGAGCCGC	ATG	AGC	CGC	1	4.99	0	0	0	0	0	100
CGGCGTATGAGTCAT	ATG	AGT	CAT	1	4.99	0	0	0	0	0	100
TGAGACATGAGTCAC	ATG	AGT	CAC	2	4.99	0	0	0	0	0	100
ACCTCGATGTCGCAC	ATG	TCG	CAC	1	4.99	0	0	0	0	0	100
TCTGTTATGTCGCAC	ATG	TCG	CAC	1	4.99	0	0	0	0	0	100
AGGCCGATGTCCTAT	ATG	TCC	TAT	3	4.99	0	0	0	0	0	100
CTGAGAATGAGCCAC	ATG	AGC	CAC	2	4.99	0	0	0	0	0	100
TTTTGGATGTCACAC	ATG	TCA	CAC	1	4.99	0	0	0	0	0	100
ATTTTTATGTCACGC	ATG	TCA	CGC	2	4.99	0	0	0	0	0	100
AAGTTAATGTCGCAT	ATG	TCG	CAT	1	4.99	0	0	0	0	0	100
AACACCATGAGCCAT	ATG	AGC	CAT	1	4.99	0	0	0	0	0	100
TAGTAAATGAGTCAT	ATG	AGT	CAT	2	4.99	0	0	0	0	0	100
CAGCGAATGAGTAAT	ATG	AGT	AAT	1	4.99	0	0	0	0	0	100
TCGTACATGTCCCAT	ATG	TCC	CAT	3	4.99	0	0	0	0	0	100
CTACTCATGTCACAT	ATG	TCA	CAT	1	4.99	0	0	0	0	0	100
TGTAGTATGTCGCAC	ATG	TCG	CAC	1	4.99	0	0	0	0	0	100
CAGGACATGAGTCAT	ATG	AGT	CAT	3	4.99	0	0	0	0	0	100
TTAGCAATGTCGCAC	ATG	TCG	CAC	1	4.99	0	0	0	0	0	100
GTTAATATGTCGCAT	ATG	TCG	CAT	1	4.99	0	0	0	0	0	100
GGGTCAATGTCTCAC	ATG	TCT	CAC	2	4.99	0	0	0	0	0	100
GATGAAATGTCCCAT	ATG	TCC	CAT	1	4.99	0	0	0	0	0	100
TTAGAAATGAGTCGC	ATG	AGT	CGC	2	4.99	0	0	0	0	0	100
GGGCAAATGAGTCAT	ATG	AGT	CAT	1	4.99	0	0	0	0	0	100
TGAGTGATGTCGCAG	ATG	TCG	CAG	3	4.99	0	0	0	0	0	100
ATCGTGATGTCGCAC	ATG	TCG	CAC	3	4.99	0	0	0	0	0	100
TGTCCGATGTCACAT	ATG	TCA	CAT	1	4.99	0	0	0	0	0	100
GCGCACATGTCCCAC	ATG	TCC	CAC	2	4.99	0	0	0	0	0	100
ATGTACATGTCCCAT	ATG	TCC	CAT	2	4.99	0	0	0	0	0	100
GGACTCATGTCACAT	ATG	TCA	CAT	2	4.99	0	0	0	0	0	100
TTTTGGATGTCTCAC	ATG	TCT	CAC	2	4.99	0	0	0	0	0	100
GTTTTTATGTCACAC	ATG	TCA	CAC	1	4.99	0	0	0	0	0	100
GTATGAATGAGTCAC	ATG	AGT	CAC	1	4.99	0	0	0	0	0	100
TTTTCCATGAGTCAG	ATG	AGT	CAG	2	4.99	0	0	0	0	0	100
GGCAGTATGAGTCCC	ATG	AGT	CCC	1	4.99	0	0	0	0	0	100
GCTCTCATGAGTCAC	ATG	AGT	CAC	2	4.99	0	0	0	0	0	100
ATTTGCATGAGTCAT	ATG	AGT	CAT	1	4.99	0	0	0	0	0	100
GTTTCTATGAGCCAT	ATG	AGC	CAT	2	4.99	0	0	0	0	0	100
ATCTGTATGTCGCAC	ATG	TCG	CAC	1	4.99	0	0	0	0	0	100
TCAGGCATGTCCCGT	ATG	TCC	CGT	2	4.99	0	0	0	0	0	100
TATGCGATGAGTCAT	ATG	AGT	CAT	2	4.99	0	0	0	0	0	100
TCACTGATGAGTCAG	ATG	AGT	CAG	1	4.99	0	0	0	0	0	100
TTGAGGATGTCTCAC	ATG	TCT	CAC	1	4.99	0	0	0	0	0	100
GTACCGATGAGCCAC	ATG	AGC	CAC	3	4.99	0	0	0	0	0	100
GGGCTCATGAGTCAT	ATG	AGT	CAT	1	4.99	0	0	0	0	0	100
CCGAAAATGAGTCAT	ATG	AGT	CAT	2	4.99	0	0	0	0	0	100
TCGGCTATGAGCCAC	ATG	AGC	CAC	2	4.99	0	0	0	0	0	100
CGTATGATGTCGCAT	ATG	TCG	CAT	2	4.99	0	0	0	0	0	100
ATGGTAATGTCACAC	ATG	TCA	CAC	1	4.99	0	0	0	0	0	100
CTGATTATGTCACAT	ATG	TCA	CAT	1	4.99	0	0	0	0	0	100
GTGACGATGAGCCAC	ATG	AGC	CAC	2	4.99	0	0	0	0	0	100
TCGAGGATGACTCAC	ATG	ACT	CAC	382	3.99	62.6689	12.4724	6.11282	10.8957	4.21978	3.63031
GCGCACATGTCGCAG	ATG	TCG	CAG	2	4.99	0	0	0	0	0	100
TAATAAATGAGTCAC	ATG	AGT	CAC	3	4.99	0	0	0	0	0	100
ATGCCCATGAGTCAC	ATG	AGT	CAC	2	4.99	0	0	0	0	0	100
TGCTCTATGTCCCAC	ATG	TCC	CAC	2	4.99	0	0	0	0	0	100
TCTGCAATGAGCCAT	ATG	AGC	CAT	1	4.99	0	0	0	0	0	100
GTTCTCATGTCCCAT	ATG	TCC	CAT	1	4.99	0	0	0	0	0	100
GGTAAGATGTCACAA	ATG	TCA	CAA	2	4.99	0	0	0	0	0	100
CCGCCCATGAGTCAC	ATG	AGT	CAC	3	4.99	0	0	0	0	0	100
TGGAGAATGTCCCAC	ATG	TCC	CAC	1	4.99	0	0	0	0	0	100
AAACTCATGTCTCAT	ATG	TCT	CAT	2	4.99	0	0	0	0	0	100
CGCTGTATGTCACAC	ATG	TCA	CAC	1	4.99	0	0	0	0	0	100
AGCGGGATGTCTCAT	ATG	TCT	CAT	1	4.99	0	0	0	0	0	100
TTCTTGATGTCACAT	ATG	TCA	CAT	1	4.99	0	0	0	0	0	100
CAGTGTATGAGCCAC	ATG	AGC	CAC	1	4.99	0	0	0	0	0	100
GCAACAATGAGTCAC	ATG	AGT	CAC	3	4.99	0	0	0	0	0	100
TGATAGATGAGCCAC	ATG	AGC	CAC	1	4.99	0	0	0	0	0	100
TGTATCATGAGTCAT	ATG	AGT	CAT	3	4.99	0	0	0	0	0	100
TAGATCATGAGTCAC	ATG	AGT	CAC	1	4.99	0	0	0	0	0	100
TAAGCAATGTCCCAT	ATG	TCC	CAT	2	4.99	0	0	0	0	0	100
ACACTCATGTCCCAT	ATG	TCC	CAT	2	4.99	0	0	0	0	0	100
GCAGCAATGAGTAAC	ATG	AGT	AAC	2	4.99	0	0	0	0	0	100
TGTCAAATGTCACAT	ATG	TCA	CAT	2	4.99	0	0	0	0	0	100
TATTTAATGTCACAT	ATG	TCA	CAT	1	4.99	0	0	0	0	0	100
AGAAACATGTCACAT	ATG	TCA	CAT	2	4.99	0	0	0	0	0	100
AGTTGTATGAGTCAT	ATG	AGT	CAT	1	4.99	0	0	0	0	0	100
AGACCAATGACTCAC	ATG	ACT	CAC	320	4.53	0.811305	0.791777	13.0821	47.5883	26.1411	11.5855
GGGCAAATGTCGCAC	ATG	TCG	CAC	1	4.99	0	0	0	0	0	100
TGCGGGATGACTCAC	ATG	ACT	CAC	319	4.02	63.2825	8.68372	7.86323	5.59157	9.81371	4.76524
TGTTATATGAGTCAC	ATG	AGT	CAC	2	4.99	0	0	0	0	0	100
TGTAAAATGAGTCAC	ATG	AGT	CAC	1	4.99	0	0	0	0	0	100
ACGTTAATGAGTCAT	ATG	AGT	CAT	3	4.99	0	0	0	0	0	100
TGTTTCATGTCGCAT	ATG	TCG	CAT	3	4.99	0	0	0	0	0	100
TGTAGAATGTCCCAC	ATG	TCC	CAC	1	4.99	0	0	0	0	0	100
TGGCAAATGAGTCAC	ATG	AGT	CAC	1	4.99	0	0	0	0	0	100
GTGATGATGAGTCAT	ATG	AGT	CAT	1	4.99	0	0	0	0	0	100
ATTGGCATGTCCCAC	ATG	TCC	CAC	3	4.99	0	0	0	0	0	100
AAGACTATGTCGCAC	ATG	TCG	CAC	1	4.99	0	0	0	0	0	100
TAACAAATGAGCCAT	ATG	AGC	CAT	2	4.99	0	0	0	0	0	100
TCCTGCATGTCCCAC	ATG	TCC	CAC	1	4.99	0	0	0	0	0	100
TGGACCATGTCACAC	ATG	TCA	CAC	1	4.99	0	0	0	0	0	100
TTAGAAATGAGTCAA	ATG	AGT	CAA	1	4.99	0	0	0	0	0	100
TCCTGCATGTCCCAT	ATG	TCC	CAT	2	4.99	0	0	0	0	0	100
CATGAGATGAGTCAT	ATG	AGT	CAT	1	4.99	0	0	0	0	0	100
GATGCTATGAGTCAT	ATG	AGT	CAT	2	4.99	0	0	0	0	0	100
TGCGCGATGTCGCAT	ATG	TCG	CAT	1	4.99	0	0	0	0	0	100
ACGAGCATGAGTCAT	ATG	AGT	CAT	1	4.99	0	0	0	0	0	100
AGAGAAATGTCCCAC	ATG	TCC	CAC	1	4.99	0	0	0	0	0	100
TGATCCATGTCTCAT	ATG	TCT	CAT	1	4.99	0	0	0	0	0	100
AGCTTGATGTCACAC	ATG	TCA	CAC	1	4.99	0	0	0	0	0	100
ACCAGCATGAGCCAT	ATG	AGC	CAT	1	4.99	0	0	0	0	0	100
ATTAGTATGTCACAC	ATG	TCA	CAC	1	4.99	0	0	0	0	0	100
CTTGCAATGAGCCAC	ATG	AGC	CAC	1	4.99	0	0	0	0	0	100
CCATGTATGTCACAT	ATG	TCA	CAT	2	4.99	0	0	0	0	0	100
TAGGCAATGTCGCAT	ATG	TCG	CAT	2	4.99	0	0	0	0	0	100
TTCTATATGAGTCAT	ATG	AGT	CAT	2	4.99	0	0	0	0	0	100
CTACTCATGAGTCAC	ATG	AGT	CAC	1	4.99	0	0	0	0	0	100
GCGCAGATGTCGCAC	ATG	TCG	CAC	1	4.99	0	0	0	0	0	100
TTTCGAATGAGTCAC	ATG	AGT	CAC	1	4.99	0	0	0	0	0	100
CGGTGCATGAGCCAC	ATG	AGC	CAC	2	4.99	0	0	0	0	0	100
TAGACCATGAGTCAC	ATG	AGT	CAC	1	4.99	0	0	0	0	0	100
GGATACATGTCCCAC	ATG	TCC	CAC	1	4.99	0	0	0	0	0	100
CGACTTATGTCGCAC	ATG	TCG	CAC	1	4.99	0	0	0	0	0	100
AAGGTGATGTCCCAC	ATG	TCC	CAC	1	4.99	0	0	0	0	0	100
TCGAGGATGAGGCAC	ATG	AGG	CAC	247	4.09	48.7234	11.8323	13.7282	12.4204	8.86037	4.43537
GCCTTCATGAGTCAT	ATG	AGT	CAT	2	4.99	0	0	0	0	0	100
AAGCTTATGAGCTAT	ATG	AGC	TAT	1	4.99	0	0	0	0	0	100
AGAAACATGTCTCAC	ATG	TCT	CAC	1	4.99	0	0	0	0	0	100
GGAAGCATGTCGCAT	ATG	TCG	CAT	2	4.99	0	0	0	0	0	100
CTAGTTATGAGCCAC	ATG	AGC	CAC	1	4.99	0	0	0	0	0	100
TAAAAGATGAGTCGC	ATG	AGT	CGC	1	4.99	0	0	0	0	0	100
TTAAGCATGAGTCAT	ATG	AGT	CAT	1	4.99	0	0	0	0	0	100
GCATATATGTCTCAT	ATG	TCT	CAT	1	4.99	0	0	0	0	0	100
GAAGATATGAGTCAC	ATG	AGT	CAC	2	4.99	0	0	0	0	0	100
TCATATATGTCGCAT	ATG	TCG	CAT	1	4.99	0	0	0	0	0	100
GCAGAAATGTCTCAC	ATG	TCT	CAC	1	4.99	0	0	0	0	0	100
TCAGTTATGTCACAT	ATG	TCA	CAT	1	4.99	0	0	0	0	0	100
ACTGGTATGTCGCAC	ATG	TCG	CAC	1	4.99	0	0	0	0	0	100
GCAAGAATGTCACAC	ATG	TCA	CAC	1	4.99	0	0	0	0	0	100
AGCCTTATGTCGCAC	ATG	TCG	CAC	1	4.99	0	0	0	0	0	100
AGTTAGATGTCCCAC	ATG	TCC	CAC	1	4.99	0	0	0	0	0	100
GATACTATGTCCCAT	ATG	TCC	CAT	2	4.99	0	0	0	0	0	100
TTGAGTATGTCCCAT	ATG	TCC	CAT	1	4.99	0	0	0	0	0	100
CGATAAATGAGCCAT	ATG	AGC	CAT	2	4.99	0	0	0	0	0	100
GTGAACATGTCCCAT	ATG	TCC	CAT	1	4.99	0	0	0	0	0	100
TGCGGAATGAGTCAT	ATG	AGT	CAT	1	4.99	0	0	0	0	0	100
AAAATCATGTCACAT	ATG	TCA	CAT	1	4.99	0	0	0	0	0	100
AATCTTATGAGCCAC	ATG	AGC	CAC	1	4.99	0	0	0	0	0	100
GCAGGCATGAGTCTC	ATG	AGT	CTC	1	4.99	0	0	0	0	0	100
GGCTTCATGTCGCAT	ATG	TCG	CAT	1	4.99	0	0	0	0	0	100
CTCGCAATGTCGCAC	ATG	TCG	CAC	1	4.99	0	0	0	0	0	100
TTTAGGATGTCACCC	ATG	TCA	CCC	1	4.99	0	0	0	0	0	100
TCATTCATGTCGCAC	ATG	TCG	CAC	1	4.99	0	0	0	0	0	100
CGTTGTATGAGTCAC	ATG	AGT	CAC	1	4.99	0	0	0	0	0	100
GCACACATGTCGCAG	ATG	TCG	CAG	2	4.99	0	0	0	0	0	100
TACCCGATGTCGCAC	ATG	TCG	CAC	1	4.99	0	0	0	0	0	100
TTCGCGATGAGTCAC	ATG	AGT	CAC	1	4.99	0	0	0	0	0	100
TGTCTCATGTCCCAT	ATG	TCC	CAT	1	4.99	0	0	0	0	0	100
ACCTAAATGAGCCAC	ATG	AGC	CAC	2	4.99	0	0	0	0	0	100
TCTTAGATGAGCCAC	ATG	AGC	CAC	1	4.99	0	0	0	0	0	100
TCAGTGATGTCACAT	ATG	TCA	CAT	2	4.99	0	0	0	0	0	100
CATTGAATGTCGCAC	ATG	TCG	CAC	2	4.99	0	0	0	0	0	100
CTAGTAATGAGCCAT	ATG	AGC	CAT	1	4.99	0	0	0	0	0	100
AGCGTAATGAGCTAT	ATG	AGC	TAT	1	4.99	0	0	0	0	0	100
CCGCGGATGTCACAT	ATG	TCA	CAT	1	4.99	0	0	0	0	0	100
TTGCCTATGTCCCAC	ATG	TCC	CAC	1	4.99	0	0	0	0	0	100
CACATTATGTCCCAC	ATG	TCC	CAC	1	4.99	0	0	0	0	0	100
ATTATCATGAGTCAT	ATG	AGT	CAT	1	4.99	0	0	0	0	0	100
GCTAAGATGTCACAC	ATG	TCA	CAC	2	4.99	0	0	0	0	0	100
GCGTCGATGTCTCAT	ATG	TCT	CAT	1	4.99	0	0	0	0	0	100
CTGCCGATGAGTCAT	ATG	AGT	CAT	2	4.99	0	0	0	0	0	100
TTTCAGATGTCGCAC	ATG	TCG	CAC	1	4.99	0	0	0	0	0	100
GGTACGATGTCACAT	ATG	TCA	CAT	1	4.99	0	0	0	0	0	100
TGTTTGATGAGTCAT	ATG	AGT	CAT	1	4.99	0	0	0	0	0	100
TTCGGAATGTCGCAC	ATG	TCG	CAC	1	4.99	0	0	0	0	0	100
ATTGCGATGTCTCAC	ATG	TCT	CAC	1	4.99	0	0	0	0	0	100
CAGGAGATGTCCCAT	ATG	TCC	CAT	1	4.99	0	0	0	0	0	100
CACCGTATGTCCCAC	ATG	TCC	CAC	2	4.99	0	0	0	0	0	100
AATCAAATGTCGCAT	ATG	TCG	CAT	1	4.99	0	0	0	0	0	100
TTTTAGATGTCGCAT	ATG	TCG	CAT	1	4.99	0	0	0	0	0	100
CTGCATATGTCACAT	ATG	TCA	CAT	1	4.99	0	0	0	0	0	100
AAGTTCATGAGTCAT	ATG	AGT	CAT	2	4.99	0	0	0	0	0	100
ACGATCATGAGTCAC	ATG	AGT	CAC	1	4.99	0	0	0	0	0	100
TCGAGGATGCGGCAC	ATG	CGG	CAC	182	4.07	56.99	10.2164	6.25644	9.39693	12.5669	4.57334
TGTTTTATGAGCCAT	ATG	AGC	CAT	2	4.99	0	0	0	0	0	100
TAAGGAATGAGTCAT	ATG	AGT	CAT	1	4.99	0	0	0	0	0	100
TGTAAAATGTCGCAC	ATG	TCG	CAC	1	4.99	0	0	0	0	0	100
AGGTAAATGTCGCAC	ATG	TCG	CAC	1	4.99	0	0	0	0	0	100
TAAGCGATGTCTCAT	ATG	TCT	CAT	1	4.99	0	0	0	0	0	100
ATATTTATGTCGCAC	ATG	TCG	CAC	1	4.99	0	0	0	0	0	100
GCACCCATGAGTCAC	ATG	AGT	CAC	1	4.99	0	0	0	0	0	100
ACATAAATGTCGCAT	ATG	TCG	CAT	2	4.99	0	0	0	0	0	100
AGAAGAATGTCGCAT	ATG	TCG	CAT	2	4.99	0	0	0	0	0	100
GAGCGGATGTCCCAT	ATG	TCC	CAT	1	4.99	0	0	0	0	0	100
CAGCGAATGAGTCGT	ATG	AGT	CGT	2	4.99	0	0	0	0	0	100
TTTCGCATGAGCCAT	ATG	AGC	CAT	2	4.99	0	0	0	0	0	100
TTCTATATGAGCCAC	ATG	AGC	CAC	1	4.99	0	0	0	0	0	100
GTTAGCATGTCACAC	ATG	TCA	CAC	1	4.99	0	0	0	0	0	100
TGGTGTATGTCACAT	ATG	TCA	CAT	1	4.99	0	0	0	0	0	100
GAATGAATGAGTCAT	ATG	AGT	CAT	1	4.99	0	0	0	0	0	100
CCGCATATGTCCCAT	ATG	TCC	CAT	1	4.99	0	0	0	0	0	100
GTGATAATGTCGCAG	ATG	TCG	CAG	1	4.99	0	0	0	0	0	100
TTATCAATGAGTCAC	ATG	AGT	CAC	1	4.99	0	0	0	0	0	100
CATAGTATGTCACAC	ATG	TCA	CAC	1	4.99	0	0	0	0	0	100
GTACGTATGAGTCAC	ATG	AGT	CAC	1	4.99	0	0	0	0	0	100
CAGGAGATGTCTCAC	ATG	TCT	CAC	1	4.99	0	0	0	0	0	100
ATCTCGATGAGTCAT	ATG	AGT	CAT	2	4.99	0	0	0	0	0	100
CCCGGTATGTCGCAC	ATG	TCG	CAC	1	4.99	0	0	0	0	0	100
AGGCTTATGTCCCAC	ATG	TCC	CAC	1	4.99	0	0	0	0	0	100
TTTCCGATGTCTCAC	ATG	TCT	CAC	2	4.99	0	0	0	0	0	100
TTCATCATGAGTCAC	ATG	AGT	CAC	1	4.99	0	0	0	0	0	100
GGCCCTATGAGCCAC	ATG	AGC	CAC	1	4.99	0	0	0	0	0	100
TACTTAATGAGTCAC	ATG	AGT	CAC	2	4.99	0	0	0	0	0	100
AAGCTTATGAGCAAT	ATG	AGC	AAT	1	4.99	0	0	0	0	0	100
TAGGCTATGTCCCTC	ATG	TCC	CTC	1	4.99	0	0	0	0	0	100
AAGATAATGAGCCAC	ATG	AGC	CAC	1	4.99	0	0	0	0	0	100
ACTTGTATGTCCCAC	ATG	TCC	CAC	1	4.99	0	0	0	0	0	100
CCAGCTATGAGCCTC	ATG	AGC	CTC	2	4.99	0	0	0	0	0	100
GTCTATATGAGCCAT	ATG	AGC	CAT	1	4.99	0	0	0	0	0	100
TGAATCATGTCGCAT	ATG	TCG	CAT	1	4.99	0	0	0	0	0	100
ATACTCATGAGTCAT	ATG	AGT	CAT	2	4.99	0	0	0	0	0	100
TTCGCGATGTCACAT	ATG	TCA	CAT	2	4.99	0	0	0	0	0	100
AGTTCGATGTCCCAC	ATG	TCC	CAC	1	4.99	0	0	0	0	0	100
CACGGCATGTCGCAC	ATG	TCG	CAC	2	4.99	0	0	0	0	0	100
GGCCGTATGTCGCAT	ATG	TCG	CAT	1	4.99	0	0	0	0	0	100
GGGATCATGTCACAT	ATG	TCA	CAT	1	4.99	0	0	0	0	0	100
GTGACCATGTCCCAT	ATG	TCC	CAT	1	4.99	0	0	0	0	0	100
CTACGAATGTCCCAC	ATG	TCC	CAC	1	4.99	0	0	0	0	0	100
CGTCGAATGAGTCAT	ATG	AGT	CAT	1	4.99	0	0	0	0	0	100
TCACTTATGAGTCAC	ATG	AGT	CAC	2	4.99	0	0	0	0	0	100
TTGTATATGAGTCAC	ATG	AGT	CAC	1	4.99	0	0	0	0	0	100
CACATTATGAGTCAC	ATG	AGT	CAC	1	4.99	0	0	0	0	0	100
GTCCTTATGTCGTAC	ATG	TCG	TAC	2	4.99	0	0	0	0	0	100
GATTATATGTCGCAT	ATG	TCG	CAT	1	4.99	0	0	0	0	0	100
TAACAGATGAGCCAG	ATG	AGC	CAG	1	4.99	0	0	0	0	0	100
TAAGATATGTCGCAC	ATG	TCG	CAC	2	4.99	0	0	0	0	0	100
GGCGCGATGTCGCAT	ATG	TCG	CAT	1	4.99	0	0	0	0	0	100
CTGCCGATGTCACAG	ATG	TCA	CAG	2	4.99	0	0	0	0	0	100
TACCTGATGAGTCAC	ATG	AGT	CAC	2	4.99	0	0	0	0	0	100
ATAGCGATGAGTCAC	ATG	AGT	CAC	1	4.99	0	0	0	0	0	100
GACCCGATGTCACAT	ATG	TCA	CAT	2	4.99	0	0	0	0	0	100
TCTCCTATGAGCCAT	ATG	AGC	CAT	2	4.99	0	0	0	0	0	100
TAGCGAATGTCGCAC	ATG	TCG	CAC	1	4.99	0	0	0	0	0	100
TTAAGCATGTCTCAT	ATG	TCT	CAT	1	4.99	0	0	0	0	0	100
GTGGGAATGACTCAC	ATG	ACT	CAC	143	4.48	0.682149	3.32501	10.0384	58.881	19.6891	7.38435
ATAGTGATGTCGAAC	ATG	TCG	AAC	2	4.99	0	0	0	0	0	100
CGTGGTATGTCACAT	ATG	TCA	CAT	1	4.99	0	0	0	0	0	100
TTAGCCATGAGCCAC	ATG	AGC	CAC	1	4.99	0	0	0	0	0	100
GCTCAGATGAGTCAT	ATG	AGT	CAT	1	4.99	0	0	0	0	0	100
TGCGAGATGTCCCAT	ATG	TCC	CAT	1	4.99	0	0	0	0	0	100
AGCAAGATGACCCAT	ATG	ACC	CAT	142	4.3	2.1178	52.375	19.0463	15.529	4.44877	6.48315
CACGGTATGTCCCCC	ATG	TCC	CCC	1	4.99	0	0	0	0	0	100
TTGGCAATGTCCCAC	ATG	TCC	CAC	1	4.99	0	0	0	0	0	100
TTTCATATGAGTTAT	ATG	AGT	TAT	1	4.99	0	0	0	0	0	100
GGTTTCATGACCCAC	ATG	ACC	CAC	141	4.13	34.46	34.4832	14.7893	5.54815	4.63795	6.08151
GCTTAAATGTCCCAT	ATG	TCC	CAT	2	4.99	0	0	0	0	0	100
TTTGCAATGTCGCCC	ATG	TCG	CCC	1	4.99	0	0	0	0	0	100
TGGTACATGTCCCAC	ATG	TCC	CAC	2	4.99	0	0	0	0	0	100
CTCTGTATGAGCCAT	ATG	AGC	CAT	1	4.99	0	0	0	0	0	100
CGCGCCATGTCTCAC	ATG	TCT	CAC	1	4.99	0	0	0	0	0	100
TCAATCATGTCACAC	ATG	TCA	CAC	1	4.99	0	0	0	0	0	100
CAACGTATGTCGCAT	ATG	TCG	CAT	1	4.99	0	0	0	0	0	100
ACGCCTATGTCGCAC	ATG	TCG	CAC	2	4.99	0	0	0	0	0	100
AGGCCTATGTCACAC	ATG	TCA	CAC	1	4.99	0	0	0	0	0	100
TTGTACATGTCGCAC	ATG	TCG	CAC	1	4.99	0	0	0	0	0	100
CACCTGATGTCCCAC	ATG	TCC	CAC	2	4.99	0	0	0	0	0	100
CAAGGCATGAGTCAC	ATG	AGT	CAC	1	4.99	0	0	0	0	0	100
ATGGCTATGAGTCAC	ATG	AGT	CAC	1	4.99	0	0	0	0	0	100
GCGGCGATGTCGCAC	ATG	TCG	CAC	1	4.99	0	0	0	0	0	100
TCTTCAATGTCCCAT	ATG	TCC	CAT	1	4.99	0	0	0	0	0	100
GGTACCATGTCGCAC	ATG	TCG	CAC	1	4.99	0	0	0	0	0	100
GTGAGCATGTCGCTT	ATG	TCG	CTT	1	4.99	0	0	0	0	0	100
AGACCAATGAGGCAC	ATG	AGG	CAC	135	4.49	0.36081	0.590778	12.3627	57.8883	20.9429	7.85457
GACGGTATGTCGCAC	ATG	TCG	CAC	1	4.99	0	0	0	0	0	100
ATGTGTATGTCCCAT	ATG	TCC	CAT	2	4.99	0	0	0	0	0	100
GTAATCATGTCACAC	ATG	TCA	CAC	2	4.99	0	0	0	0	0	100
CTATGAATGTCGCAC	ATG	TCG	CAC	1	4.99	0	0	0	0	0	100
AGTCCAATGTCGCAC	ATG	TCG	CAC	1	4.99	0	0	0	0	0	100
ACGGTAATGAGTCAC	ATG	AGT	CAC	2	4.99	0	0	0	0	0	100
CCGCCTATGAGTCAC	ATG	AGT	CAC	1	4.99	0	0	0	0	0	100
GGGGTAATGAGTCAA	ATG	AGT	CAA	2	4.99	0	0	0	0	0	100
TCGCTAATGTCCCAT	ATG	TCC	CAT	2	4.99	0	0	0	0	0	100
TTCGATATGAGCTAT	ATG	AGC	TAT	1	4.99	0	0	0	0	0	100
GTATGTATGAGTCAT	ATG	AGT	CAT	2	4.99	0	0	0	0	0	100
GTGTAAATGTCTCAT	ATG	TCT	CAT	1	4.99	0	0	0	0	0	100
ACCGGTATGAGCCAC	ATG	AGC	CAC	1	4.99	0	0	0	0	0	100
AGGTTTATGAGTCAC	ATG	AGT	CAC	2	4.99	0	0	0	0	0	100
TCTGTAATGTCCCAT	ATG	TCC	CAT	1	4.99	0	0	0	0	0	100
ACAGATATGAGTCAT	ATG	AGT	CAT	1	4.99	0	0	0	0	0	100
AACGCTATGTCCCAC	ATG	TCC	CAC	1	4.99	0	0	0	0	0	100
GGAAAAATGTCTCAC	ATG	TCT	CAC	1	4.99	0	0	0	0	0	100
ATAAGCATGAGTCAT	ATG	AGT	CAT	2	4.99	0	0	0	0	0	100
TGAATTATGTCTCAT	ATG	TCT	CAT	1	4.99	0	0	0	0	0	100
AAGGGCATGTCTGAT	ATG	TCT	GAT	2	4.99	0	0	0	0	0	100
CCGTGTATGAGTCAC	ATG	AGT	CAC	1	4.99	0	0	0	0	0	100
GCTAGGATGACCCAT	ATG	ACC	CAT	128	4.28	6.66216	44.8915	19.9136	18.6853	4.99662	4.85088
TGGTCAATGTCGCAC	ATG	TCG	CAC	1	4.99	0	0	0	0	0	100
CGCTTAATGAGTCAC	ATG	AGT	CAC	2	4.99	0	0	0	0	0	100
GCTAGAATGTCTCAT	ATG	TCT	CAT	1	4.99	0	0	0	0	0	100
CCTTTAATGTCCCAT	ATG	TCC	CAT	1	4.99	0	0	0	0	0	100
CTGGTAATGAGCCAT	ATG	AGC	CAT	1	4.99	0	0	0	0	0	100
TACCGTATGAGCCAT	ATG	AGC	CAT	1	4.99	0	0	0	0	0	100
GCGGCAATGTCCCAC	ATG	TCC	CAC	1	4.99	0	0	0	0	0	100
TTGATCATGAGTCGC	ATG	AGT	CGC	2	4.99	0	0	0	0	0	100
GATCGTATGAGTCAT	ATG	AGT	CAT	1	4.99	0	0	0	0	0	100
TAGGCGATGAGCCAT	ATG	AGC	CAT	1	4.99	0	0	0	0	0	100
CGAAATATGAGTCAT	ATG	AGT	CAT	1	4.99	0	0	0	0	0	100
GCCAAGATGTCCCAC	ATG	TCC	CAC	1	4.99	0	0	0	0	0	100
AATGTTATGTCGCAC	ATG	TCG	CAC	1	4.99	0	0	0	0	0	100
GTTAAGATGAGCCAC	ATG	AGC	CAC	2	4.99	0	0	0	0	0	100
ACTAGAATGAGCCAT	ATG	AGC	CAT	2	4.99	0	0	0	0	0	100
CGCCGTATGTCGCAC	ATG	TCG	CAC	1	4.99	0	0	0	0	0	100
TTAAGGATGACCCAT	ATG	ACC	CAT	121	4.28	7.21249	46.9262	20.7641	12.1373	9.02124	3.93869
TGCGGGATGAGGCAC	ATG	AGG	CAC	121	4.06	50.8267	14.4644	7.87828	19.9528	4.4463	2.43157
GTCCCGATGTCGCAT	ATG	TCG	CAT	1	4.99	0	0	0	0	0	100
GGTCTGATGTCGCGC	ATG	TCG	CGC	2	4.99	0	0	0	0	0	100
ACGAGCATGAGCCAC	ATG	AGC	CAC	1	4.99	0	0	0	0	0	100
AGTTGCATGTCCCAT	ATG	TCC	CAT	1	4.99	0	0	0	0	0	100
GTAGGGATGACGCAT	ATG	ACG	CAT	120	4.3	0	29.9664	37.3392	27.2023	2.47998	3.01214
AATGCCATGTCCCAT	ATG	TCC	CAT	1	4.99	0	0	0	0	0	100
GCTTGAATGAGTCAT	ATG	AGT	CAT	1	4.99	0	0	0	0	0	100
GGAAGAATGTCCCAC	ATG	TCC	CAC	1	4.99	0	0	0	0	0	100
CGAAGAATGTCGCAT	ATG	TCG	CAT	1	4.99	0	0	0	0	0	100
ATAGCCATGTCTCAT	ATG	TCT	CAT	1	4.99	0	0	0	0	0	100
AGTTTGATGTCTCAC	ATG	TCT	CAC	1	4.99	0	0	0	0	0	100
GCTTAGATGTCCCAC	ATG	TCC	CAC	1	4.99	0	0	0	0	0	100
CCTAATATGAGTCAT	ATG	AGT	CAT	2	4.99	0	0	0	0	0	100
CGGTATATGAGCCAC	ATG	AGC	CAC	1	4.99	0	0	0	0	0	100
CAAGTGATGTCCCAT	ATG	TCC	CAT	1	4.99	0	0	0	0	0	100
GACTCTATGTCCCAC	ATG	TCC	CAC	1	4.99	0	0	0	0	0	100
CAACGGATGACTCAT	ATG	ACT	CAT	118	4.31	9.66984	43.6788	15.8207	11.2501	14.1053	5.47527
TAATTAATGAGTCAC	ATG	AGT	CAC	2	4.99	0	0	0	0	0	100
TTGTGGATGACTCAT	ATG	ACT	CAT	93	4.1	48.3892	16.563	11.8373	8.88497	8.91282	5.41268
TAGAGTATGTCCCAC	ATG	TCC	CAC	1	4.99	0	0	0	0	0	100
CTCGGCATGTCCCAC	ATG	TCC	CAC	2	4.99	0	0	0	0	0	100
AGGGGAATGAGTCTC	ATG	AGT	CTC	1	4.99	0	0	0	0	0	100
GTAATTATGAGTCAT	ATG	AGT	CAT	1	4.99	0	0	0	0	0	100
GCCATGATGACGCAC	ATG	ACG	CAC	81	4.26	2.24039	51.0711	27.8087	11.7416	5.23303	1.90515
TACGCAATGTCGCAT	ATG	TCG	CAT	2	4.99	0	0	0	0	0	100
TCAAGAATGTCCCAC	ATG	TCC	CAC	2	4.99	0	0	0	0	0	100
CGGGGAATGACGCAT	ATG	ACG	CAT	97	4.31	3.76802	46.9526	21.4001	11.4962	13.1846	3.19835
CGTGGCATGAGCCAA	ATG	AGC	CAA	2	4.99	0	0	0	0	0	100
TGAATTATGAGCCAT	ATG	AGC	CAT	1	4.99	0	0	0	0	0	100
TGCTACATGAGTCAC	ATG	AGT	CAC	1	4.99	0	0	0	0	0	100
ATGCGCATGTCTCAC	ATG	TCT	CAC	1	4.99	0	0	0	0	0	100
TGATCAATGAGTCAT	ATG	AGT	CAT	2	4.99	0	0	0	0	0	100
GTTGAGATGAGCCAT	ATG	AGC	CAT	1	4.99	0	0	0	0	0	100
GGGGGAATGACGCAC	ATG	ACG	CAC	114	4.18	38.6477	9.12003	9.65851	26.0991	10.9127	5.56199
ACCATCATGAGCCAC	ATG	AGC	CAC	1	4.99	0	0	0	0	0	100
CGAGTAATGAGCCAC	ATG	AGC	CAC	1	4.99	0	0	0	0	0	100
ACTTAAATGAGTCAT	ATG	AGT	CAT	1	4.99	0	0	0	0	0	100
AAATCTATGTCTCAC	ATG	TCT	CAC	1	4.99	0	0	0	0	0	100
GACACCATGAGTCAC	ATG	AGT	CAC	2	4.99	0	0	0	0	0	100
CTCTTGATGTCACAT	ATG	TCA	CAT	1	4.99	0	0	0	0	0	100
GCTAGTATGAGTCAT	ATG	AGT	CAT	2	4.99	0	0	0	0	0	100
TGGGTTATGAGCTAT	ATG	AGC	TAT	1	4.99	0	0	0	0	0	100
ACATAAATGAGTCAT	ATG	AGT	CAT	2	4.99	0	0	0	0	0	100
GGCTTTATGTCGCAC	ATG	TCG	CAC	1	4.99	0	0	0	0	0	100
ATTGTAATGAGCAAC	ATG	AGC	AAC	1	4.99	0	0	0	0	0	100
GACGCAATGTCACAT	ATG	TCA	CAT	2	4.99	0	0	0	0	0	100
TGTTAAATGTCTCAT	ATG	TCT	CAT	1	4.99	0	0	0	0	0	100
TGAATCATGTCACAT	ATG	TCA	CAT	2	4.99	0	0	0	0	0	100
GTTATCATGAGCCAG	ATG	AGC	CAG	2	4.99	0	0	0	0	0	100
CGATTTATGTCACAT	ATG	TCA	CAT	2	4.99	0	0	0	0	0	100
GTCATAATGAGCCAT	ATG	AGC	CAT	1	4.99	0	0	0	0	0	100
GGAGTGATGACCCAT	ATG	ACC	CAT	111	4.44	0.933959	5.31285	22.4201	47.637	17.1532	6.54282
AGTTACATGACTCAC	ATG	ACT	CAC	111	4.34	1.03279	16.7842	42.3895	25.6617	10.8415	3.29025
TCGAGGATGTGTCAC	ATG	TGT	CAC	111	4.12	43.733	11.6774	7.08066	27.3305	6.85225	3.3262
TCAGGCATGTCCCTT	ATG	TCC	CTT	2	4.99	0	0	0	0	0	100
GAAGCTATGAGCCAC	ATG	AGC	CAC	1	4.99	0	0	0	0	0	100
TTAAATATGTCTCAC	ATG	TCT	CAC	1	4.99	0	0	0	0	0	100
TGAGGGATGACTCAT	ATG	ACT	CAT	110	4.28	7.33724	44.9676	21.8636	11.8173	11.8544	2.15983
GTAGTGATGACTCAT	ATG	ACT	CAT	110	4.12	42.3823	10.7676	12.3172	25.9957	3.47574	5.06155
GTAGCCATGTCCCAC	ATG	TCC	CAC	2	4.99	0	0	0	0	0	100
TGCTAAATGTCTCAT	ATG	TCT	CAT	1	4.99	0	0	0	0	0	100
ACGGGAATGTCGCAC	ATG	TCG	CAC	1	4.99	0	0	0	0	0	100
GGAAAAATGAGTCAC	ATG	AGT	CAC	1	4.99	0	0	0	0	0	100
AATAAGATGTCCCAT	ATG	TCC	CAT	2	4.99	0	0	0	0	0	100
TTTGTGATGAGTCAT	ATG	AGT	CAT	1	4.99	0	0	0	0	0	100
TTTGTGATGAGTCAC	ATG	AGT	CAC	1	4.99	0	0	0	0	0	100
TCACGTATGTCGCAT	ATG	TCG	CAT	1	4.99	0	0	0	0	0	100
GATGCTATGAGTCAC	ATG	AGT	CAC	1	4.99	0	0	0	0	0	100
CCCTGTATGTCACTT	ATG	TCA	CTT	1	4.99	0	0	0	0	0	100
GCGAATATGTCCCAC	ATG	TCC	CAC	1	4.99	0	0	0	0	0	100
GTGTAAATGTCGCAC	ATG	TCG	CAC	1	4.99	0	0	0	0	0	100
AGATTTATGAGCCAT	ATG	AGC	CAT	1	4.99	0	0	0	0	0	100
ATGCGTATGAGCCAT	ATG	AGC	CAT	2	4.99	0	0	0	0	0	100
AATGGAATGAGCCAC	ATG	AGC	CAC	1	4.99	0	0	0	0	0	100
TTTGCAATGTCGCGC	ATG	TCG	CGC	1	4.99	0	0	0	0	0	100
GCCTGGATGTCCCAC	ATG	TCC	CAC	2	4.99	0	0	0	0	0	100
GCGTGTATGTCACAT	ATG	TCA	CAT	2	4.99	0	0	0	0	0	100
AAGTCTATGTCCCAC	ATG	TCC	CAC	1	4.99	0	0	0	0	0	100
ACAGGTATGTCCCAC	ATG	TCC	CAC	1	4.99	0	0	0	0	0	100
AGGATAATGTCGCAC	ATG	TCG	CAC	1	4.99	0	0	0	0	0	100
CTGCTAATGTCTCAT	ATG	TCT	CAT	1	4.99	0	0	0	0	0	100
CGTAGCATGTCGCAG	ATG	TCG	CAG	2	4.99	0	0	0	0	0	100
TAGGTTATGAGTCAT	ATG	AGT	CAT	2	4.99	0	0	0	0	0	100
GTTGTCATGTCACAT	ATG	TCA	CAT	1	4.99	0	0	0	0	0	100
TACTCAATGAGCCAC	ATG	AGC	CAC	1	4.99	0	0	0	0	0	100
TTTGGAATGTCACAC	ATG	TCA	CAC	1	4.99	0	0	0	0	0	100
GGAATAATGAGCCAC	ATG	AGC	CAC	1	4.99	0	0	0	0	0	100
GAGTATATGAGTCAC	ATG	AGT	CAC	1	4.99	0	0	0	0	0	100
GAGTATATGAGTCAT	ATG	AGT	CAT	1	4.99	0	0	0	0	0	100
AGTAGTATGTCACAC	ATG	TCA	CAC	1	4.99	0	0	0	0	0	100
GTCGGCATGTCACAT	ATG	TCA	CAT	1	4.99	0	0	0	0	0	100
TCCACCATGAGCCAC	ATG	AGC	CAC	1	4.99	0	0	0	0	0	100
CTCACGATGTCTCAC	ATG	TCT	CAC	2	4.99	0	0	0	0	0	100
TATGTCATGAGCCAT	ATG	AGC	CAT	1	4.99	0	0	0	0	0	100
TATGTCATGAGCCAC	ATG	AGC	CAC	1	4.99	0	0	0	0	0	100
CACAGCATGTCTCAC	ATG	TCT	CAC	2	4.99	0	0	0	0	0	100
GTGTCTATGAGCCAT	ATG	AGC	CAT	1	4.99	0	0	0	0	0	100
GAGGACATGTCCCAC	ATG	TCC	CAC	1	4.99	0	0	0	0	0	100
ACCCGCATGTCACAT	ATG	TCA	CAT	1	4.99	0	0	0	0	0	100
CCCGGCATGAGTCAC	ATG	AGT	CAC	1	4.99	0	0	0	0	0	100
CGTGGGATGACCCAT	ATG	ACC	CAT	81	4.31	9.17301	33.573	20.1438	22.0169	5.35162	9.74162
TTTTCTATGTCCCAT	ATG	TCC	CAT	1	4.99	0	0	0	0	0	100
CGCATCATGAGCCAT	ATG	AGC	CAT	2	4.99	0	0	0	0	0	100
CTCCTGATGTCCCAC	ATG	TCC	CAC	2	4.99	0	0	0	0	0	100
TATTTGATGTCCCAC	ATG	TCC	CAC	1	4.99	0	0	0	0	0	100
TTATGAATGTCCCAC	ATG	TCC	CAC	2	4.99	0	0	0	0	0	100
TGGTACATGAGCCAT	ATG	AGC	CAT	1	4.99	0	0	0	0	0	100
CTAATCATGTCTCAC	ATG	TCT	CAC	1	4.99	0	0	0	0	0	100
TCACGCATGTCACAC	ATG	TCA	CAC	1	4.99	0	0	0	0	0	100
CTTTTAATGTCTCAT	ATG	TCT	CAT	1	4.99	0	0	0	0	0	100
TCATGCATGTCCCAC	ATG	TCC	CAC	1	4.99	0	0	0	0	0	100
TGGTCTATGAGCCAC	ATG	AGC	CAC	1	4.99	0	0	0	0	0	100
GGGGTGATGACACAC	ATG	ACA	CAC	70	4.34	1.61219	41.9258	13.7345	29.5216	7.04784	6.15805
GGGCTGATGACCCAT	ATG	ACC	CAT	97	4	61.3607	11.0904	7.92171	13.383	2.98229	3.26188
GAGGTAATGAGCCAC	ATG	AGC	CAC	1	4.99	0	0	0	0	0	100
GCGAATATGTCGCAT	ATG	TCG	CAT	1	4.99	0	0	0	0	0	100
GAGGAGATGTCCCAC	ATG	TCC	CAC	1	4.99	0	0	0	0	0	100
CGGATAATGAGTCAC	ATG	AGT	CAC	1	4.99	0	0	0	0	0	100
TTAGCTATGTCGCTC	ATG	TCG	CTC	2	4.99	0	0	0	0	0	100
TAGCGCATGAGCCAT	ATG	AGC	CAT	1	4.99	0	0	0	0	0	100
TACCGGATGTCGCAC	ATG	TCG	CAC	2	4.99	0	0	0	0	0	100
TGGTTAATGAGTCAT	ATG	AGT	CAT	1	4.99	0	0	0	0	0	100
TTTAAAATGAGTCAT	ATG	AGT	CAT	1	4.99	0	0	0	0	0	100
GATATGATGAGTCAC	ATG	AGT	CAC	2	4.99	0	0	0	0	0	100
GAATTAATGAGCCAT	ATG	AGC	CAT	1	4.99	0	0	0	0	0	100
CGAGGTATGTCACAC	ATG	TCA	CAC	1	4.99	0	0	0	0	0	100
ACGGTAATGAGCCAT	ATG	AGC	CAT	1	4.99	0	0	0	0	0	100
ACGTAAATGTCTCAC	ATG	TCT	CAC	1	4.99	0	0	0	0	0	100
CTAGCCATGAGCCTT	ATG	AGC	CTT	2	4.99	0	0	0	0	0	100
GCCGTAATGTCTCAC	ATG	TCT	CAC	1	4.99	0	0	0	0	0	100
GGGTACATGAGCCAT	ATG	AGC	CAT	1	4.99	0	0	0	0	0	100
ATTCCGATGTCCCAT	ATG	TCC	CAT	1	4.99	0	0	0	0	0	100
GCATGGATGTCCCAC	ATG	TCC	CAC	1	4.99	0	0	0	0	0	100
CGAGTCATGAGCCAT	ATG	AGC	CAT	2	4.99	0	0	0	0	0	100
ACCTAGATGAGCTAT	ATG	AGC	TAT	1	4.99	0	0	0	0	0	100
GCACACATGTCACAT	ATG	TCA	CAT	2	4.99	0	0	0	0	0	100
GCACACATGTCACAC	ATG	TCA	CAC	2	4.99	0	0	0	0	0	100
TCTTGCATGTCGCCT	ATG	TCG	CCT	2	4.99	0	0	0	0	0	100
CAGCGAATGAGTCTT	ATG	AGT	CTT	1	4.99	0	0	0	0	0	100
TGCGTTATGACCCAT	ATG	ACC	CAT	95	4.52	0	1.75948	13.4301	49.6268	22.7547	12.4289
GCGTAGATGTCCCGT	ATG	TCC	CGT	1	4.99	0	0	0	0	0	100
TTTCGCATGTCGCAT	ATG	TCG	CAT	2	4.99	0	0	0	0	0	100
GAAAGAATGTCCCAC	ATG	TCC	CAC	2	4.99	0	0	0	0	0	100
ATGCTAATGAGTCAC	ATG	AGT	CAC	1	4.99	0	0	0	0	0	100
GCTAGCATGAGTCAT	ATG	AGT	CAT	1	4.99	0	0	0	0	0	100
TTCATGATGTCACAT	ATG	TCA	CAT	1	4.99	0	0	0	0	0	100
CTTCTTATGAGCCAC	ATG	AGC	CAC	2	4.99	0	0	0	0	0	100
TAGTATATGTCTCAT	ATG	TCT	CAT	1	4.99	0	0	0	0	0	100
GCCATCATGAGCCAT	ATG	AGC	CAT	1	4.99	0	0	0	0	0	100
GCGTGTATGAGCCAA	ATG	AGC	CAA	2	4.99	0	0	0	0	0	100
CTCGTAATGTCTCAC	ATG	TCT	CAC	1	4.99	0	0	0	0	0	100
TGGTAGATGTCACAT	ATG	TCA	CAT	1	4.99	0	0	0	0	0	100
TCGTCTATGAGCCAT	ATG	AGC	CAT	1	4.99	0	0	0	0	0	100
AATAGTATGAGTCAT	ATG	AGT	CAT	2	4.99	0	0	0	0	0	100
GGTCGTATGAGTCAT	ATG	AGT	CAT	2	4.99	0	0	0	0	0	100
AGGGTTATGAGTCAT	ATG	AGT	CAT	2	4.99	0	0	0	0	0	100
TGACGTATGAGTCAT	ATG	AGT	CAT	1	4.99	0	0	0	0	0	100
GAGACTATGAGTCAT	ATG	AGT	CAT	1	4.99	0	0	0	0	0	100
AATCGGATGAGTCAT	ATG	AGT	CAT	1	4.99	0	0	0	0	0	100
GTTGAAATGTCGCAC	ATG	TCG	CAC	1	4.99	0	0	0	0	0	100
AACTTAATGTCCCAC	ATG	TCC	CAC	1	4.99	0	0	0	0	0	100
TGCCATATGAGTCAT	ATG	AGT	CAT	1	4.99	0	0	0	0	0	100
TAACTGATGTCCCAT	ATG	TCC	CAT	2	4.99	0	0	0	0	0	100
GCGTGTATGACCCAT	ATG	ACC	CAT	88	4.73	0	2.26769	4.32924	25.586	26.884	40.933
GCTGGGATGACTCAC	ATG	ACT	CAC	55	4.11	50.5208	11.7424	8.94886	11.3321	10.101	7.3548
GGCGTCATGTCACAT	ATG	TCA	CAT	1	4.99	0	0	0	0	0	100
TGTCTTATGTCACAC	ATG	TCA	CAC	1	4.99	0	0	0	0	0	100
CGAAGGATGTCCCAT	ATG	TCC	CAT	1	4.99	0	0	0	0	0	100
GTTAGGATGAGTCAT	ATG	AGT	CAT	1	4.99	0	0	0	0	0	100
TCCAGCATGTCCCAC	ATG	TCC	CAC	2	4.99	0	0	0	0	0	100
TTTGCGATGAGTTAT	ATG	AGT	TAT	2	4.99	0	0	0	0	0	100
AAATAAATGAGTCAT	ATG	AGT	CAT	2	4.99	0	0	0	0	0	100
CTCGTTATGAGTCAC	ATG	AGT	CAC	1	4.99	0	0	0	0	0	100
ACATTTATGAGTCAT	ATG	AGT	CAT	1	4.99	0	0	0	0	0	100
GGAATAATGTCACAC	ATG	TCA	CAC	1	4.99	0	0	0	0	0	100
ATCTTGATGAGTCAT	ATG	AGT	CAT	2	4.99	0	0	0	0	0	100
ATGGTCATGAGTCAT	ATG	AGT	CAT	2	4.99	0	0	0	0	0	100
TGGGACATGTCACAC	ATG	TCA	CAC	1	4.99	0	0	0	0	0	100
GCTGTCATGTCCCAT	ATG	TCC	CAT	2	4.99	0	0	0	0	0	100
TAGGTAATGTCACAC	ATG	TCA	CAC	1	4.99	0	0	0	0	0	100
CGAATAATGAGTCAT	ATG	AGT	CAT	1	4.99	0	0	0	0	0	100
AAGGGTATGTCACAC	ATG	TCA	CAC	2	4.99	0	0	0	0	0	100
GGTAAGATGAGCCAT	ATG	AGC	CAT	2	4.99	0	0	0	0	0	100
ATGTCCATGAGTCAC	ATG	AGT	CAC	1	4.99	0	0	0	0	0	100
CAGCATATGTCACAT	ATG	TCA	CAT	2	4.99	0	0	0	0	0	100
TATGCAATGTCTCAC	ATG	TCT	CAC	1	4.99	0	0	0	0	0	100
GTGAGTATGAGCCAC	ATG	AGC	CAC	1	4.99	0	0	0	0	0	100
GGAGCAATGTCACAT	ATG	TCA	CAT	1	4.99	0	0	0	0	0	100
GCTGCCATGTCTCAC	ATG	TCT	CAC	1	4.99	0	0	0	0	0	100
GATATTATGTCCCAT	ATG	TCC	CAT	2	4.99	0	0	0	0	0	100
TTACACATGTCACAT	ATG	TCA	CAT	1	4.99	0	0	0	0	0	100
CCCGGCATGTCACAT	ATG	TCA	CAT	2	4.99	0	0	0	0	0	100
GTCTGGATGACTCAT	ATG	ACT	CAT	69	4.24	12.1388	47.0648	17.366	14.6605	1.63349	7.13629
ATTGCCATGTCCCAT	ATG	TCC	CAT	2	4.99	0	0	0	0	0	100
AAGCCTATGTCACAT	ATG	TCA	CAT	2	4.99	0	0	0	0	0	100
TCGAAAATGAGTCAT	ATG	AGT	CAT	1	4.99	0	0	0	0	0	100
CCGTATATGTCCCAT	ATG	TCC	CAT	2	4.99	0	0	0	0	0	100
TTTGTTATGTCGCAG	ATG	TCG	CAG	1	4.99	0	0	0	0	0	100
TTCACGATGAGCCAC	ATG	AGC	CAC	1	4.99	0	0	0	0	0	100
TCTGTGATGAGTCAT	ATG	AGT	CAT	1	4.99	0	0	0	0	0	100
CGCTCTATGAGTCAC	ATG	AGT	CAC	2	4.99	0	0	0	0	0	100
TCGGAGATGTCCCAT	ATG	TCC	CAT	2	4.99	0	0	0	0	0	100
GTAGTTATGAGCCAT	ATG	AGC	CAT	1	4.99	0	0	0	0	0	100
GTAATGATGTCTCAG	ATG	TCT	CAG	1	4.99	0	0	0	0	0	100
CGACGAATGAGCCAC	ATG	AGC	CAC	1	4.99	0	0	0	0	0	100
TGATAAATGAGTCAC	ATG	AGT	CAC	1	4.99	0	0	0	0	0	100
ACTGTCATGAGTCAC	ATG	AGT	CAC	1	4.99	0	0	0	0	0	100
AAGCTCATGTCACAT	ATG	TCA	CAT	1	4.99	0	0	0	0	0	100
AGCAGAATGAGCCAC	ATG	AGC	CAC	1	4.99	0	0	0	0	0	100
TGGTATATGAGCCAC	ATG	AGC	CAC	1	4.99	0	0	0	0	0	100
GCTATTATGTCTCAT	ATG	TCT	CAT	1	4.99	0	0	0	0	0	100
CGTGGCATGACCCAT	ATG	ACC	CAT	88	4.53	1.23257	2.0004	16.2255	41.9142	23.7152	14.9121
CACGGTATGAGTCAT	ATG	AGT	CAT	1	4.99	0	0	0	0	0	100
ACGAGTATGTCCCAT	ATG	TCC	CAT	1	4.99	0	0	0	0	0	100
CGTGCCATGACCCAT	ATG	ACC	CAT	93	4.4	0.588121	14.4187	30.2204	35.5781	12.4152	6.77955
CAGCTAATGAGCCAT	ATG	AGC	CAT	1	4.99	0	0	0	0	0	100
GTGAAGATGACGCAT	ATG	ACG	CAT	89	4.3	0.620652	22.3162	40.5947	31.0121	5.45628	0
GTTATCATGTCCCAT	ATG	TCC	CAT	2	4.99	0	0	0	0	0	100
ACGTAAATGTCACAC	ATG	TCA	CAC	2	4.99	0	0	0	0	0	100
GTACTCATGTCCCAT	ATG	TCC	CAT	1	4.99	0	0	0	0	0	100
AGGGGAATGACGCAT	ATG	ACG	CAT	54	4.22	24.1675	17.6797	18.7236	28.4619	6.34249	4.62474
AATGGAATGAGCCAT	ATG	AGC	CAT	2	4.99	0	0	0	0	0	100
GCCAGAATGTCCCAC	ATG	TCC	CAC	1	4.99	0	0	0	0	0	100
GTCATTATGTCGCAT	ATG	TCG	CAT	1	4.99	0	0	0	0	0	100
CTGTTGATGTCCCAT	ATG	TCC	CAT	2	4.99	0	0	0	0	0	100
GTAGAAATGAGTCAT	ATG	AGT	CAT	1	4.99	0	0	0	0	0	100
TGGATCATGAGTCAC	ATG	AGT	CAC	1	4.99	0	0	0	0	0	100
TAGGGGATGTCGCAC	ATG	TCG	CAC	1	4.99	0	0	0	0	0	100
GCCGCAATGAGTCAC	ATG	AGT	CAC	2	4.99	0	0	0	0	0	100
AAAATCATGAGCCAT	ATG	AGC	CAT	1	4.99	0	0	0	0	0	100
ACTGGCATGAGTCAC	ATG	AGT	CAC	1	4.99	0	0	0	0	0	100
CGTGCTATGAGCTAC	ATG	AGC	TAC	1	4.99	0	0	0	0	0	100
GGGACAATGAGTCAC	ATG	AGT	CAC	1	4.99	0	0	0	0	0	100
ATTTGTATGTCACAT	ATG	TCA	CAT	1	4.99	0	0	0	0	0	100
GCAGCAATGAGTCAA	ATG	AGT	CAA	2	4.99	0	0	0	0	0	100
GTATAGATGAGTCAT	ATG	AGT	CAT	2	4.99	0	0	0	0	0	100
GCGGAGATGTCGCAC	ATG	TCG	CAC	1	4.99	0	0	0	0	0	100
TTGTACATGTCCCCT	ATG	TCC	CCT	1	4.99	0	0	0	0	0	100
GTAATAATGACTCAT	ATG	ACT	CAT	71	4.13	45.562	13.7891	6.5701	19.409	9.26999	5.39977
GCAATTATGAGTCAT	ATG	AGT	CAT	1	4.99	0	0	0	0	0	100
ACGTAGATGAGCCAC	ATG	AGC	CAC	1	4.99	0	0	0	0	0	100
TGACTGATGTCCCAT	ATG	TCC	CAT	1	4.99	0	0	0	0	0	100
TACAAGATGAGTCAC	ATG	AGT	CAC	1	4.99	0	0	0	0	0	100
ACGCCTATGAGCCAT	ATG	AGC	CAT	1	4.99	0	0	0	0	0	100
AGCGACATGTCGCAT	ATG	TCG	CAT	1	4.99	0	0	0	0	0	100
GCACGAATGTCCCAT	ATG	TCC	CAT	1	4.99	0	0	0	0	0	100
GCGTATATGAGTCAT	ATG	AGT	CAT	1	4.99	0	0	0	0	0	100
GTTGGCATGTCACGT	ATG	TCA	CGT	2	4.99	0	0	0	0	0	100
TTACTGATGAGCCAT	ATG	AGC	CAT	1	4.99	0	0	0	0	0	100
ACATATATGAGCCAC	ATG	AGC	CAC	1	4.99	0	0	0	0	0	100
CAGCGAATGAGTGAT	ATG	AGT	GAT	2	4.99	0	0	0	0	0	100
TTGATTATGAGCCAT	ATG	AGC	CAT	2	4.99	0	0	0	0	0	100
CGCATTATGAGCCAC	ATG	AGC	CAC	2	4.99	0	0	0	0	0	100
TTGATTATGAGCCAC	ATG	AGC	CAC	1	4.99	0	0	0	0	0	100
CAGGGAATGTCACAC	ATG	TCA	CAC	2	4.99	0	0	0	0	0	100
AACTCAATGAGCCAT	ATG	AGC	CAT	2	4.99	0	0	0	0	0	100
GTGCCTATGTCGCAT	ATG	TCG	CAT	2	4.99	0	0	0	0	0	100
TCAAGTATGAGTCAT	ATG	AGT	CAT	1	4.99	0	0	0	0	0	100
AGGCGCATGTCACCT	ATG	TCA	CCT	1	4.99	0	0	0	0	0	100
GAAATCATGTCGCAC	ATG	TCG	CAC	1	4.99	0	0	0	0	0	100
GAAATCATGTCGCAT	ATG	TCG	CAT	1	4.99	0	0	0	0	0	100
CTTTTAATGTCGCAC	ATG	TCG	CAC	1	4.99	0	0	0	0	0	100
TAGCTGATGAGTCAC	ATG	AGT	CAC	1	4.99	0	0	0	0	0	100
ATAGCTATGTCTCAT	ATG	TCT	CAT	1	4.99	0	0	0	0	0	100
AGTACCATGTCACAC	ATG	TCA	CAC	1	4.99	0	0	0	0	0	100
TCATTAATGTCACAC	ATG	TCA	CAC	2	4.99	0	0	0	0	0	100
AGGTTGATGAGTCAT	ATG	AGT	CAT	1	4.99	0	0	0	0	0	100
TTTACCATGAGTCAT	ATG	AGT	CAT	1	4.99	0	0	0	0	0	100
GTGCGCATGTCGCAT	ATG	TCG	CAT	2	4.99	0	0	0	0	0	100
AGATCAATGTCGCAT	ATG	TCG	CAT	1	4.99	0	0	0	0	0	100
TAGTGCATGTCCCAT	ATG	TCC	CAT	1	4.99	0	0	0	0	0	100
TGGAGCATGAGCCAT	ATG	AGC	CAT	1	4.99	0	0	0	0	0	100
AGCCGCATGACTCAT	ATG	ACT	CAT	86	4.31	0	34.4312	37.0453	17.8729	7.17006	3.48047
TATTCTATGTCCCAC	ATG	TCC	CAC	1	4.99	0	0	0	0	0	100
GGGTATATGAGTCGC	ATG	AGT	CGC	1	4.99	0	0	0	0	0	100
CATTGTATGACTCAT	ATG	ACT	CAT	85	4.33	0.667596	18.546	43.6652	26.337	8.21657	2.56768
CTAGAAATGTCACAT	ATG	TCA	CAT	2	4.99	0	0	0	0	0	100
TCTGTGATGTCGCAC	ATG	TCG	CAC	2	4.99	0	0	0	0	0	100
TCAGCCATGTCGCAT	ATG	TCG	CAT	1	4.99	0	0	0	0	0	100
AATGTAATGTCACAT	ATG	TCA	CAT	1	4.99	0	0	0	0	0	100
GTTCGAATGAGCCAC	ATG	AGC	CAC	1	4.99	0	0	0	0	0	100
TAGGATATGTCGCAC	ATG	TCG	CAC	2	4.99	0	0	0	0	0	100
TAACGCATGTCTCAC	ATG	TCT	CAC	1	4.99	0	0	0	0	0	100
GACGAAATGTCGCAT	ATG	TCG	CAT	2	4.99	0	0	0	0	0	100
GTGTTTATGTCACAT	ATG	TCA	CAT	1	4.99	0	0	0	0	0	100
GCTGGCATGTCACAC	ATG	TCA	CAC	1	4.99	0	0	0	0	0	100
CAGGCCATGAGTCAT	ATG	AGT	CAT	2	4.99	0	0	0	0	0	100
GGAAATATGAGTTAC	ATG	AGT	TAC	1	4.99	0	0	0	0	0	100
GCAAGCATGTCCCAT	ATG	TCC	CAT	1	4.99	0	0	0	0	0	100
CATCTCATGAGTCAT	ATG	AGT	CAT	1	4.99	0	0	0	0	0	100
CAACGGATGAGGCAT	ATG	AGG	CAT	46	4.22	12.4133	38.1297	27.7828	14.4344	7.23982	0
GCACGTATGTCCCAC	ATG	TCC	CAC	2	4.99	0	0	0	0	0	100
GGTCAGATGAGTCAC	ATG	AGT	CAC	1	4.99	0	0	0	0	0	100
TGTCCGATGTCGCAC	ATG	TCG	CAC	1	4.99	0	0	0	0	0	100
AGACCAATGTGTCAC	ATG	TGT	CAC	88	4.41	0	3.38665	15.3281	68.1143	11.8447	1.3262
TGTCGGATGTCACAC	ATG	TCA	CAC	1	4.99	0	0	0	0	0	100
GGTCTGATGACGCAT	ATG	ACG	CAT	70	4.2	32.6233	15.6034	7.43966	30.1364	11.7524	2.44491
GAAGCTATGTCACAT	ATG	TCA	CAT	1	4.99	0	0	0	0	0	100
GAGTAAATGTCACAT	ATG	TCA	CAT	1	4.99	0	0	0	0	0	100
GTATTCATGAGTCAT	ATG	AGT	CAT	1	4.99	0	0	0	0	0	100
GGAATGATGAGCCAT	ATG	AGC	CAT	1	4.99	0	0	0	0	0	100
TGCGGGATGCGTCAC	ATG	CGT	CAC	87	3.85	84.6145	7.05813	5.04152	0	1.89798	1.3879
TCTGCTATGAGCCAC	ATG	AGC	CAC	1	4.99	0	0	0	0	0	100
GGGTAAATGAGTCAC	ATG	AGT	CAC	1	4.99	0	0	0	0	0	100
ACTGGGATGAGCCAC	ATG	AGC	CAC	2	4.99	0	0	0	0	0	100
GTCATCATGTCTCAC	ATG	TCT	CAC	1	4.99	0	0	0	0	0	100
GTGGGAATGAGTCAG	ATG	AGT	CAG	1	4.99	0	0	0	0	0	100
TTACGCATGTCGCAT	ATG	TCG	CAT	2	4.99	0	0	0	0	0	100
CGCGCGATGTCGCAC	ATG	TCG	CAC	1	4.99	0	0	0	0	0	100
ACTTGAATGAGTCAT	ATG	AGT	CAT	2	4.99	0	0	0	0	0	100
TGTCAAATGAGCCAT	ATG	AGC	CAT	2	4.99	0	0	0	0	0	100
TCGAGGGTGAGTCAC	GTG	AGT	CAC	75	3.99	67.8782	11.4154	5.43896	0	12.2856	2.98183
TGCAGAATGTCCCAT	ATG	TCC	CAT	1	4.99	0	0	0	0	0	100
GATATAATGAGTCAC	ATG	AGT	CAC	1	4.99	0	0	0	0	0	100
TAGTTGATGACTCAT	ATG	ACT	CAT	45	4.17	33.3102	30.9507	7.37335	12.4566	13.8793	2.02984
GCTTAAATGTCGCAT	ATG	TCG	CAT	1	4.99	0	0	0	0	0	100
GAATCTATGTCCCAT	ATG	TCC	CAT	1	4.99	0	0	0	0	0	100
TGGTAGATGTCGCAC	ATG	TCG	CAC	2	4.99	0	0	0	0	0	100
TGGCCGATGAGTCAC	ATG	AGT	CAC	2	4.99	0	0	0	0	0	100
GTCTTAATGACGCAT	ATG	ACG	CAT	75	4.32	0.738457	10.8577	48.2999	33.0196	5.19354	1.89077
GGGCCCATGAGTCAT	ATG	AGT	CAT	2	4.99	0	0	0	0	0	100
GATAAGATGTCCCAC	ATG	TCC	CAC	1	4.99	0	0	0	0	0	100
GCATCGATGAGTCAC	ATG	AGT	CAC	2	4.99	0	0	0	0	0	100
GGGTAGATGTCACAT	ATG	TCA	CAT	1	4.99	0	0	0	0	0	100
TGTCTTATGTCGCAC	ATG	TCG	CAC	2	4.99	0	0	0	0	0	100
TTTGCAATGAGCCAC	ATG	AGC	CAC	2	4.99	0	0	0	0	0	100
GGTATTATGTCTCAT	ATG	TCT	CAT	1	4.99	0	0	0	0	0	100
AGTATAATGAGCTAC	ATG	AGC	TAC	1	4.99	0	0	0	0	0	100
CTGGCAATGTCGCTT	ATG	TCG	CTT	2	4.99	0	0	0	0	0	100
TATCCCATGAGTCAC	ATG	AGT	CAC	1	4.99	0	0	0	0	0	100
GTTGTTATGTCACAC	ATG	TCA	CAC	2	4.99	0	0	0	0	0	100
CAGCGGATGTCTCAC	ATG	TCT	CAC	2	4.99	0	0	0	0	0	100
CGATTCATGTCTCAT	ATG	TCT	CAT	1	4.99	0	0	0	0	0	100
TATTGGATGTCCCAC	ATG	TCC	CAC	1	4.99	0	0	0	0	0	100
CTCTTGATGTCTCAC	ATG	TCT	CAC	1	4.99	0	0	0	0	0	100
TCGAATATGAGTCAT	ATG	AGT	CAT	1	4.99	0	0	0	0	0	100
CTCGATATGTCCCAC	ATG	TCC	CAC	1	4.99	0	0	0	0	0	100
TATGAAATGTCCCAT	ATG	TCC	CAT	1	4.99	0	0	0	0	0	100
GAAGGCATGAGTCAT	ATG	AGT	CAT	2	4.99	0	0	0	0	0	100
TGGCAGATGTCCCAT	ATG	TCC	CAT	1	4.99	0	0	0	0	0	100
AAGAAAATGTCACAC	ATG	TCA	CAC	1	4.99	0	0	0	0	0	100
ACCTGCATGTCGCAC	ATG	TCG	CAC	1	4.99	0	0	0	0	0	100
AGTTCTATGACGCAC	ATG	ACG	CAC	53	4.3	3.39319	46.0433	21.065	17.7833	5.94427	5.7709
GTAGATATGAGCCAT	ATG	AGC	CAT	2	4.99	0	0	0	0	0	100
GAGGATATGAGCCAC	ATG	AGC	CAC	2	4.99	0	0	0	0	0	100
TCACCTATGTCCCAT	ATG	TCC	CAT	1	4.99	0	0	0	0	0	100
AGGCTCATGAGTCAC	ATG	AGT	CAC	1	4.99	0	0	0	0	0	100
CCGTAGATGAGTCAT	ATG	AGT	CAT	1	4.99	0	0	0	0	0	100
GGTGGTATGTCGAAC	ATG	TCG	AAC	1	4.99	0	0	0	0	0	100
CATAAGATGTCCCAC	ATG	TCC	CAC	2	4.99	0	0	0	0	0	100
GTCAGGATGTCACAC	ATG	TCA	CAC	1	4.99	0	0	0	0	0	100
ACTAATATGAGCCAC	ATG	AGC	CAC	2	4.99	0	0	0	0	0	100
TCAGACATGTCACAT	ATG	TCA	CAT	1	4.99	0	0	0	0	0	100
TTTGCAATGTCGCGT	ATG	TCG	CGT	1	4.99	0	0	0	0	0	100
TTCAGGATGTCACAC	ATG	TCA	CAC	2	4.99	0	0	0	0	0	100
AGTATAATGACCCAC	ATG	ACC	CAC	73	4.57	0.732394	0	12.5473	40.4507	32.2012	14.0684
TCGATTATGACTCAT	ATG	ACT	CAT	40	4.26	2.95925	31.2581	41.2516	19.3564	5.17464	0
TTAGCGATGAGTCAC	ATG	AGT	CAC	1	4.99	0	0	0	0	0	100
GCAGGTATGTCACAC	ATG	TCA	CAC	1	4.99	0	0	0	0	0	100
CGGAGAATGAGTCAC	ATG	AGT	CAC	1	4.99	0	0	0	0	0	100
TGTGACATGAGTCAA	ATG	AGT	CAA	1	4.99	0	0	0	0	0	100
CCAGCAATGAGCCAC	ATG	AGC	CAC	1	4.99	0	0	0	0	0	100
AGGGATATGACCCAC	ATG	ACC	CAC	64	4.5	1.60119	5.20605	8.67967	54.4492	16.8081	13.2558
TCGAGGATGCGCCAC	ATG	CGC	CAC	61	4.02	57.7414	10.6759	8.13603	17.1761	4.59176	1.67886
ATATCCATGTCGCAT	ATG	TCG	CAT	1	4.99	0	0	0	0	0	100
CAGTTTATGACCCAT	ATG	ACC	CAT	66	4.83	1.04851	3.42205	3.26074	5.51907	27.6645	59.0851
TTGCTAATGAGCCAT	ATG	AGC	CAT	1	4.99	0	0	0	0	0	100
ACGTGGATGTCCCAT	ATG	TCC	CAT	1	4.99	0	0	0	0	0	100
CGGGGTATGACGCAC	ATG	ACG	CAC	69	4.3	0.83143	33.9698	34.9566	21.8639	7.30927	1.06898
ACACACATGTCGCAT	ATG	TCG	CAT	1	4.99	0	0	0	0	0	100
GAGAGTATGAGTCAT	ATG	AGT	CAT	1	4.99	0	0	0	0	0	100
TTTGTAATGTCCCAT	ATG	TCC	CAT	1	4.99	0	0	0	0	0	100
GATCAAATGAGTCAT	ATG	AGT	CAT	1	4.99	0	0	0	0	0	100
ATCACTATGTCCCAT	ATG	TCC	CAT	2	4.99	0	0	0	0	0	100
TTCCCGATGAGTCAT	ATG	AGT	CAT	1	4.99	0	0	0	0	0	100
GGAGCGATGAGCCAA	ATG	AGC	CAA	1	4.99	0	0	0	0	0	100
TTGTGGATGAGGCAT	ATG	AGG	CAT	45	4	59.5563	15.1435	11.5408	4.86464	6.51333	2.38144
GACTGAATGAGTCAT	ATG	AGT	CAT	1	4.99	0	0	0	0	0	100
AAGATTATGAGTCAT	ATG	AGT	CAT	2	4.99	0	0	0	0	0	100
TGGAAGATGAGCCAT	ATG	AGC	CAT	1	4.99	0	0	0	0	0	100
TTTTTTATGTCTCAT	ATG	TCT	CAT	2	4.99	0	0	0	0	0	100
TGCGGGATGTGTCAC	ATG	TGT	CAC	55	4.06	54.2321	14.2995	9.08945	7.67874	12.8246	1.8756
AAGCTTATGACCCAT	ATG	ACC	CAT	60	4.8	3.40373	1.85093	0	11.8882	27.8385	55.0186
AAGGTGATGAGCCGT	ATG	AGC	CGT	2	4.99	0	0	0	0	0	100
GATCCTATGAGTCGT	ATG	AGT	CGT	2	4.99	0	0	0	0	0	100
CAGCAAATGAGTCAT	ATG	AGT	CAT	1	4.99	0	0	0	0	0	100
AAAAAGATGAGTCAT	ATG	AGT	CAT	2	4.99	0	0	0	0	0	100
AGGGTGATGACCCAT	ATG	ACC	CAT	72	4.34	0.819524	32.1416	34.4561	17.246	10.0865	5.25036
TGTATTATGAGCCAT	ATG	AGC	CAT	1	4.99	0	0	0	0	0	100
ATTGCGATGAGCCAT	ATG	AGC	CAT	1	4.99	0	0	0	0	0	100
CGAGGTATGTCCCAC	ATG	TCC	CAC	1	4.99	0	0	0	0	0	100
GCTTGGATGACGCAT	ATG	ACG	CAT	75	4.29	0	32.2543	37.8358	23.9613	4.00467	1.94393
TTGGTAATGACGCAT	ATG	ACG	CAT	72	4.36	0.684211	5.59398	29.8346	55.7895	7.21805	0.879699
GCTCGTATGAGCCAC	ATG	AGC	CAC	1	4.99	0	0	0	0	0	100
CTGATCATGAGCCAT	ATG	AGC	CAT	1	4.99	0	0	0	0	0	100
GAGCTCATGTCACAT	ATG	TCA	CAT	1	4.99	0	0	0	0	0	100
CAGTTAATGTCGCAC	ATG	TCG	CAC	1	4.99	0	0	0	0	0	100
GGGGCTATGACCCAT	ATG	ACC	CAT	67	4.41	0	4.42807	13.7084	71.251	7.14445	3.46804
CCGACAATGAGTCAC	ATG	AGT	CAC	1	4.99	0	0	0	0	0	100
TACATGATGTCCCAC	ATG	TCC	CAC	1	4.99	0	0	0	0	0	100
AGTTAAATGTCTCAT	ATG	TCT	CAT	1	4.99	0	0	0	0	0	100
AACTCAATGTCCCAC	ATG	TCC	CAC	2	4.99	0	0	0	0	0	100
TCCGTTATGTCGCAT	ATG	TCG	CAT	1	4.99	0	0	0	0	0	100
TGTAGGATGACTCAT	ATG	ACT	CAT	66	4.31	0	49.2473	28.4424	9.60458	8.0289	4.67684
TGGCGTATGAGTCAT	ATG	AGT	CAT	1	4.99	0	0	0	0	0	100
CCAGCTATGAGCTAC	ATG	AGC	TAC	2	4.99	0	0	0	0	0	100
ATAATCATGAGCCAT	ATG	AGC	CAT	1	4.99	0	0	0	0	0	100
TTTCCCATGTCCCAT	ATG	TCC	CAT	1	4.99	0	0	0	0	0	100
GTATCCATGAGCCAT	ATG	AGC	CAT	1	4.99	0	0	0	0	0	100
CCGTCTATGTCCCAC	ATG	TCC	CAC	1	4.99	0	0	0	0	0	100
TGCCATATGTCACAC	ATG	TCA	CAC	1	4.99	0	0	0	0	0	100
TGCCATATGTCACAT	ATG	TCA	CAT	2	4.99	0	0	0	0	0	100
CGAAAAATGTCCCAT	ATG	TCC	CAT	2	4.99	0	0	0	0	0	100
GACGTGATGTCACAT	ATG	TCA	CAT	1	4.99	0	0	0	0	0	100
CTCTTTATGAGTCAC	ATG	AGT	CAC	2	4.99	0	0	0	0	0	100
GAGCGTATGTCTCAC	ATG	TCT	CAC	1	4.99	0	0	0	0	0	100
CCAGCCATGAGCCAT	ATG	AGC	CAT	1	4.99	0	0	0	0	0	100
AATTTGATGTCTCAC	ATG	TCT	CAC	1	4.99	0	0	0	0	0	100
GGAGCGATGACCCAT	ATG	ACC	CAT	70	4.49	0	3.40484	9.73357	60.2947	15.8867	10.6802
TCGTCTATGTCTCAC	ATG	TCT	CAC	1	4.99	0	0	0	0	0	100
CGGCGAATGAGTCAC	ATG	AGT	CAC	1	4.99	0	0	0	0	0	100
AAGCGCATGAGCCAC	ATG	AGC	CAC	1	4.99	0	0	0	0	0	100
CTACGCATGTCACAT	ATG	TCA	CAT	2	4.99	0	0	0	0	0	100
CCGCCCATGAGCCAC	ATG	AGC	CAC	1	4.99	0	0	0	0	0	100
TAGTAGATGAGCCAT	ATG	AGC	CAT	1	4.99	0	0	0	0	0	100
CGTATCATGAGTCAT	ATG	AGT	CAT	2	4.99	0	0	0	0	0	100
ACTTATATGTCCCAT	ATG	TCC	CAT	2	4.99	0	0	0	0	0	100
CAAAGGATGTCACAC	ATG	TCA	CAC	2	4.99	0	0	0	0	0	100
AAGGAAATGAGTCAC	ATG	AGT	CAC	1	4.99	0	0	0	0	0	100
TTTCTGATGAGTCAT	ATG	AGT	CAT	1	4.99	0	0	0	0	0	100
GGGCGAATGACCCAT	ATG	ACC	CAT	68	4.21	41.6267	18.297	3.48222	8.83475	17.7187	10.0406
GGCGTCATGTCCCAT	ATG	TCC	CAT	1	4.99	0	0	0	0	0	100
TGATGCATGAGCCAT	ATG	AGC	CAT	1	4.99	0	0	0	0	0	100
ACGTTAATGTCGCAC	ATG	TCG	CAC	1	4.99	0	0	0	0	0	100
CCCTGAATGTCACAT	ATG	TCA	CAT	2	4.99	0	0	0	0	0	100
TGCAGCATGAGCCAC	ATG	AGC	CAC	2	4.99	0	0	0	0	0	100
ATGGCTATGAGCCAT	ATG	AGC	CAT	1	4.99	0	0	0	0	0	100
GCAGCTATGTCCCAT	ATG	TCC	CAT	1	4.99	0	0	0	0	0	100
ATTTGAATGTCGCAT	ATG	TCG	CAT	1	4.99	0	0	0	0	0	100
CGGGTAATGACTCAT	ATG	ACT	CAT	50	4.49	3.66457	23.8598	13.2674	22.402	14.9793	21.8269
TATGATATGAGCCAT	ATG	AGC	CAT	1	4.99	0	0	0	0	0	100
GGCCGTATGACCCAT	ATG	ACC	CAT	68	4.65	0.82338	1.34817	3.84546	36.8169	31.8585	25.3076
ATATTCATGAGCCAT	ATG	AGC	CAT	1	4.99	0	0	0	0	0	100
GCCCTTATGTCGCAT	ATG	TCG	CAT	1	4.99	0	0	0	0	0	100
GCACTCATGAGTAAT	ATG	AGT	AAT	2	4.99	0	0	0	0	0	100
TATTCAATGTCCCAC	ATG	TCC	CAC	2	4.99	0	0	0	0	0	100
GTTTAGATGAGTCAC	ATG	AGT	CAC	2	4.99	0	0	0	0	0	100
TAGGTGATGAGTTAT	ATG	AGT	TAT	1	4.99	0	0	0	0	0	100
CCCGGCATGTCCCAT	ATG	TCC	CAT	1	4.99	0	0	0	0	0	100
GAGTTCATGAGCCAT	ATG	AGC	CAT	1	4.99	0	0	0	0	0	100
TAAGCTATGTCGCAT	ATG	TCG	CAT	1	4.99	0	0	0	0	0	100
TAGAATATGTCCCAT	ATG	TCC	CAT	2	4.99	0	0	0	0	0	100
AGGGGTATGACGCAT	ATG	ACG	CAT	51	4.26	1.15015	20.6775	55.5233	21.1704	0	1.47877
ACGCAGATGTCCCAT	ATG	TCC	CAT	2	4.99	0	0	0	0	0	100
CTGGTCATGTCGCAT	ATG	TCG	CAT	2	4.99	0	0	0	0	0	100
CGGATCATGTCGCAT	ATG	TCG	CAT	1	4.99	0	0	0	0	0	100
TAAATGATGAGCCAC	ATG	AGC	CAC	1	4.99	0	0	0	0	0	100
GCAAGTATGAGTCAC	ATG	AGT	CAC	2	4.99	0	0	0	0	0	100
CCAGGGATGAGCCAC	ATG	AGC	CAC	1	4.99	0	0	0	0	0	100
CGCCTAATGTCGCAC	ATG	TCG	CAC	1	4.99	0	0	0	0	0	100
AGAGCAATGACTCAC	ATG	ACT	CAC	62	4.48	0.826221	4.04939	16.7242	49.9818	18.8941	9.52424
TTGTATATGTCGTAT	ATG	TCG	TAT	2	4.99	0	0	0	0	0	100
TCATACATGAGTCAT	ATG	AGT	CAT	2	4.99	0	0	0	0	0	100
GTGCATATGAGTCAT	ATG	AGT	CAT	1	4.99	0	0	0	0	0	100
TGCCCTATGTCGCCC	ATG	TCG	CCC	2	4.99	0	0	0	0	0	100
TTTGAAATGAGCCAT	ATG	AGC	CAT	2	4.99	0	0	0	0	0	100
CTAGTCATGTCCCAT	ATG	TCC	CAT	1	4.99	0	0	0	0	0	100
TTTTATATGTCCCAC	ATG	TCC	CAC	2	4.99	0	0	0	0	0	100
AACGGAATGAGCCAC	ATG	AGC	CAC	1	4.99	0	0	0	0	0	100
TAAGCTATGTCTCAT	ATG	TCT	CAT	1	4.99	0	0	0	0	0	100
TCCCCTATGTCGCAC	ATG	TCG	CAC	1	4.99	0	0	0	0	0	100
TGCGAAATGTCACAT	ATG	TCA	CAT	1	4.99	0	0	0	0	0	100
TTGAAAATGAGTCGC	ATG	AGT	CGC	1	4.99	0	0	0	0	0	100
ACGTAAATGTCGCGT	ATG	TCG	CGT	2	4.99	0	0	0	0	0	100
AGAGGGATGAGCCAC	ATG	AGC	CAC	1	4.99	0	0	0	0	0	100
CGTTTCATGTCACAC	ATG	TCA	CAC	2	4.99	0	0	0	0	0	100
TGACGAATGTCACAC	ATG	TCA	CAC	1	4.99	0	0	0	0	0	100
CAATAAATGTCTCAT	ATG	TCT	CAT	1	4.99	0	0	0	0	0	100
AAAGGGATGAGTCAC	ATG	AGT	CAC	1	4.99	0	0	0	0	0	100
CTACCTATGTCGCAT	ATG	TCG	CAT	1	4.99	0	0	0	0	0	100
ACTGCCATGAGTCAC	ATG	AGT	CAC	1	4.99	0	0	0	0	0	100
GTGAGGATGTCACGC	ATG	TCA	CGC	2	4.99	0	0	0	0	0	100
CCATCTATGAGCCAC	ATG	AGC	CAC	1	4.99	0	0	0	0	0	100
CATCTAATGAGTCAT	ATG	AGT	CAT	2	4.99	0	0	0	0	0	100
GGGCTCATGTCACAG	ATG	TCA	CAG	1	4.99	0	0	0	0	0	100
GTGGCTATGTCACAT	ATG	TCA	CAT	1	4.99	0	0	0	0	0	100
TACCAGATGAGCCAC	ATG	AGC	CAC	1	4.99	0	0	0	0	0	100
GACATCATGAGCCAC	ATG	AGC	CAC	2	4.99	0	0	0	0	0	100
CACAGGATGACGCAT	ATG	ACG	CAT	63	4.31	0	21.1585	48.9634	21.8902	3.25203	4.73577
GTCACTATGTCACAT	ATG	TCA	CAT	1	4.99	0	0	0	0	0	100
TCTTCCATGTCGCAT	ATG	TCG	CAT	2	4.99	0	0	0	0	0	100
TTCGAAATGAGTCAC	ATG	AGT	CAC	1	4.99	0	0	0	0	0	100
CCAACGATGAGCCAC	ATG	AGC	CAC	2	4.99	0	0	0	0	0	100
GATAGAATGTCCCAC	ATG	TCC	CAC	1	4.99	0	0	0	0	0	100
GTGGTCATGTCACAT	ATG	TCA	CAT	1	4.99	0	0	0	0	0	100
CAGGCCATGTCTCAT	ATG	TCT	CAT	1	4.99	0	0	0	0	0	100
GGGAGCATGTCGCAG	ATG	TCG	CAG	1	4.99	0	0	0	0	0	100
CGTTTGATGTCGCAC	ATG	TCG	CAC	1	4.99	0	0	0	0	0	100
ATCAGCATGTCGCAT	ATG	TCG	CAT	1	4.99	0	0	0	0	0	100
AGCTATATGAGCCAC	ATG	AGC	CAC	1	4.99	0	0	0	0	0	100
ATTAGGATGACCCAT	ATG	ACC	CAT	64	4.36	0.874916	10.0087	43.6016	32.2181	7.69157	5.60523
GTGTATATGTCCCAC	ATG	TCC	CAC	1	4.99	0	0	0	0	0	100
CTGTTTATGTCTCAC	ATG	TCT	CAC	1	4.99	0	0	0	0	0	100
TGTTATATGAGCCAC	ATG	AGC	CAC	1	4.99	0	0	0	0	0	100
TGGTAAATGAGCCAT	ATG	AGC	CAT	1	4.99	0	0	0	0	0	100
GCCCGTATGAGTCAC	ATG	AGT	CAC	2	4.99	0	0	0	0	0	100
CTGGCCATGTCGCAT	ATG	TCG	CAT	2	4.99	0	0	0	0	0	100
TTTGACATGTCCCAC	ATG	TCC	CAC	1	4.99	0	0	0	0	0	100
TCGCGTATGAGTCAC	ATG	AGT	CAC	1	4.99	0	0	0	0	0	100
CTAGCAATGAGCCAT	ATG	AGC	CAT	1	4.99	0	0	0	0	0	100
GCGAGGATGACTCAC	ATG	ACT	CAC	63	4.02	61.8862	8.56731	6.11951	13.7797	4.60763	5.0396
TAAGTTATGAGTCAC	ATG	AGT	CAC	1	4.99	0	0	0	0	0	100
CTCGTGATGTCCCAT	ATG	TCC	CAT	1	4.99	0	0	0	0	0	100
TGGGAAATGACTCAC	ATG	ACT	CAC	45	4.81	2.98191	0	0	7.80512	41.7305	47.4825
GTAGCTATGAGTCAT	ATG	AGT	CAT	1	4.99	0	0	0	0	0	100
CGATTAATGTCGCAC	ATG	TCG	CAC	1	4.99	0	0	0	0	0	100
GCAGCAATGTCGCAC	ATG	TCG	CAC	2	4.99	0	0	0	0	0	100
TGGGGGATGACGCAT	ATG	ACG	CAT	49	4.32	3.77358	30.7258	37.0886	13.18	8.81421	6.41785
GCACAGATGTCCCAT	ATG	TCC	CAT	1	4.99	0	0	0	0	0	100
TATTCCATGAGTCAC	ATG	AGT	CAC	1	4.99	0	0	0	0	0	100
TGTGCGATGAGTTAC	ATG	AGT	TAC	2	4.99	0	0	0	0	0	100
CAAGCAATGAGCCAC	ATG	AGC	CAC	2	4.99	0	0	0	0	0	100
AAGCCTATGTCTCAT	ATG	TCT	CAT	1	4.99	0	0	0	0	0	100
AGTCAGATGTCACAT	ATG	TCA	CAT	2	4.99	0	0	0	0	0	100
GTATGTATGTCCCAC	ATG	TCC	CAC	1	4.99	0	0	0	0	0	100
GGTCATATGAGTCAC	ATG	AGT	CAC	1	4.99	0	0	0	0	0	100
ACCTGTATGTCACAC	ATG	TCA	CAC	1	4.99	0	0	0	0	0	100
AACCTTATGTCGCAC	ATG	TCG	CAC	2	4.99	0	0	0	0	0	100
AGTAGTATGTCGCGT	ATG	TCG	CGT	2	4.99	0	0	0	0	0	100
GCGTAGATGTCACAC	ATG	TCA	CAC	2	4.99	0	0	0	0	0	100
CCACGTATGTCACAC	ATG	TCA	CAC	2	4.99	0	0	0	0	0	100
GATGGAATGACACAT	ATG	ACA	CAT	38	4.18	27.4175	13.943	21.2519	31.3906	5.997	0
CGAATGATGAGTCAT	ATG	AGT	CAT	2	4.99	0	0	0	0	0	100
GGACGTATGTCGCCC	ATG	TCG	CCC	1	4.99	0	0	0	0	0	100
GGCAGAATGTCACAT	ATG	TCA	CAT	1	4.99	0	0	0	0	0	100
CTTTGCATGTCGCAC	ATG	TCG	CAC	1	4.99	0	0	0	0	0	100
TGGGAAATGAGTTAC	ATG	AGT	TAC	2	4.99	0	0	0	0	0	100
CGCCTAATGAGTCAC	ATG	AGT	CAC	1	4.99	0	0	0	0	0	100
GGCAAGATGTCCCAC	ATG	TCC	CAC	1	4.99	0	0	0	0	0	100
CCACCGATGAGTCAT	ATG	AGT	CAT	1	4.99	0	0	0	0	0	100
GGTACAATGTCCCAT	ATG	TCC	CAT	1	4.99	0	0	0	0	0	100
AAACTCATGTCGCAC	ATG	TCG	CAC	2	4.99	0	0	0	0	0	100
GGAGGCATGACCCAC	ATG	ACC	CAC	61	4.43	0	9.66843	22.3739	48.8994	10.4022	8.65608
AGTATAATGTCTCAC	ATG	TCT	CAC	1	4.99	0	0	0	0	0	100
CTCTTAATGTCTCAC	ATG	TCT	CAC	1	4.99	0	0	0	0	0	100
TGTCCTATGTCCCAC	ATG	TCC	CAC	2	4.99	0	0	0	0	0	100
TATGGCATGTCTCAT	ATG	TCT	CAT	1	4.99	0	0	0	0	0	100
GGTGGTATGACGCAC	ATG	ACG	CAC	53	4.46	0.888759	2.90067	8.30159	65.4458	15.6363	6.82684
AGGAGAATGTCAAAT	ATG	TCA	AAT	2	4.99	0	0	0	0	0	100
TAGCCTATGAGTCAT	ATG	AGT	CAT	2	4.99	0	0	0	0	0	100
CTTCCCATGTCTCAT	ATG	TCT	CAT	1	4.99	0	0	0	0	0	100
TCTCTAATGTCGCAT	ATG	TCG	CAT	1	4.99	0	0	0	0	0	100
CTACGCATGTCACAC	ATG	TCA	CAC	1	4.99	0	0	0	0	0	100
TCAGCTATGTCGCAC	ATG	TCG	CAC	1	4.99	0	0	0	0	0	100
CTAGCCATGACCCAT	ATG	ACC	CAT	56	4.77	1.1503	3.75427	0	18.1519	28.3276	48.6159
TTCGCAATGTCTCAT	ATG	TCT	CAT	1	4.99	0	0	0	0	0	100
TTGCATATGAGTCAC	ATG	AGT	CAC	1	4.99	0	0	0	0	0	100
TCGAGGATGGGTCAC	ATG	GGT	CAC	59	4.02	53.5578	13.06	12.4451	17.5256	0	3.41142
CCGCCAATGTCCCAC	ATG	TCC	CAC	2	4.99	0	0	0	0	0	100
CAGCTTATGAGTCAT	ATG	AGT	CAT	1	4.99	0	0	0	0	0	100
CCTCCAATGAGCCAC	ATG	AGC	CAC	1	4.99	0	0	0	0	0	100
ACTGCCATGAGCCAC	ATG	AGC	CAC	1	4.99	0	0	0	0	0	100
AACATCATGTCCCAC	ATG	TCC	CAC	1	4.99	0	0	0	0	0	100
GATCTTATGAGTCAT	ATG	AGT	CAT	2	4.99	0	0	0	0	0	100
TAGATAATGTCCCAC	ATG	TCC	CAC	2	4.99	0	0	0	0	0	100
ATATTTATGTCACAC	ATG	TCA	CAC	1	4.99	0	0	0	0	0	100
CCGTCAATGAGTCAC	ATG	AGT	CAC	1	4.99	0	0	0	0	0	100
CTGGTCATGAGTCAG	ATG	AGT	CAG	1	4.99	0	0	0	0	0	100
TAGAGAATGTCCCAC	ATG	TCC	CAC	1	4.99	0	0	0	0	0	100
TTACGTATGAGCCAC	ATG	AGC	CAC	2	4.99	0	0	0	0	0	100
GGTGCCATGTCCCAC	ATG	TCC	CAC	1	4.99	0	0	0	0	0	100
AGTACTATGACCCAT	ATG	ACC	CAT	58	4.49	0.856551	2.79556	12.0011	54.0663	22.5998	7.68072
TTGTTCATGAGTCAC	ATG	AGT	CAC	1	4.99	0	0	0	0	0	100
TTCTTGATGAGCCAT	ATG	AGC	CAT	1	4.99	0	0	0	0	0	100
AAGCCAATGTCGCAT	ATG	TCG	CAT	1	4.99	0	0	0	0	0	100
TTTAATATGAGTCAC	ATG	AGT	CAC	2	4.99	0	0	0	0	0	100
CGATTCATGTCCCAT	ATG	TCC	CAT	2	4.99	0	0	0	0	0	100
AAGGCGATGAGTCAT	ATG	AGT	CAT	1	4.99	0	0	0	0	0	100
GTACTGATGTCACAT	ATG	TCA	CAT	1	4.99	0	0	0	0	0	100
GCGGCGATGTCACAT	ATG	TCA	CAT	1	4.99	0	0	0	0	0	100
CTTGCCATGTCTCAG	ATG	TCT	CAG	1	4.99	0	0	0	0	0	100
GTTTATATGTCGCGT	ATG	TCG	CGT	1	4.99	0	0	0	0	0	100
CGCTCGATGACCCAT	ATG	ACC	CAT	62	4.29	0	35.1382	37.8609	19.6753	4.93168	2.39392
AGAGAGATGAGCAAT	ATG	AGC	AAT	1	4.99	0	0	0	0	0	100
CCGCACATGTCCCAC	ATG	TCC	CAC	1	4.99	0	0	0	0	0	100
ACCTTGATGTCCCAC	ATG	TCC	CAC	1	4.99	0	0	0	0	0	100
CGGTTCATGAGCCAC	ATG	AGC	CAC	1	4.99	0	0	0	0	0	100
ATGCTCATGTCCCAT	ATG	TCC	CAT	1	4.99	0	0	0	0	0	100
CCCCGGATGAGCCAT	ATG	AGC	CAT	1	4.99	0	0	0	0	0	100
AATTCTATGTCGCAT	ATG	TCG	CAT	1	4.99	0	0	0	0	0	100
GTAGTGATGACTCAC	ATG	ACT	CAC	45	4.03	49.2571	22.1025	7.89376	17.7749	2.97177	0
ACTTCGATGTCGGAT	ATG	TCG	GAT	1	4.99	0	0	0	0	0	100
GAGGAGATGTCACAC	ATG	TCA	CAC	1	4.99	0	0	0	0	0	100
TCCCGTATGTCGCAC	ATG	TCG	CAC	1	4.99	0	0	0	0	0	100
CCTCCCATGAGCCAT	ATG	AGC	CAT	1	4.99	0	0	0	0	0	100
CACTGGATGTCACAT	ATG	TCA	CAT	1	4.99	0	0	0	0	0	100
TTCGATATGACCCAT	ATG	ACC	CAT	53	4.72	1.14178	0	1.78168	30.0251	26.1104	40.941
TTACATATGAGTCAC	ATG	AGT	CAC	1	4.99	0	0	0	0	0	100
CTTGAAATGTCACAC	ATG	TCA	CAC	1	4.99	0	0	0	0	0	100
TAGGCCATGTCGCAT	ATG	TCG	CAT	1	4.99	0	0	0	0	0	100
GCGAAAATGAGTCAG	ATG	AGT	CAG	1	4.99	0	0	0	0	0	100
TTTCACATGTCGCAT	ATG	TCG	CAT	1	4.99	0	0	0	0	0	100
CTAATAATGTCACAC	ATG	TCA	CAC	1	4.99	0	0	0	0	0	100
TCCTCTATGTCTCAT	ATG	TCT	CAT	1	4.99	0	0	0	0	0	100
GACTGGATGTCCCAC	ATG	TCC	CAC	1	4.99	0	0	0	0	0	100
TTTACAATGTCTCAT	ATG	TCT	CAT	1	4.99	0	0	0	0	0	100
CTTCCAATGAGCCAC	ATG	AGC	CAC	1	4.99	0	0	0	0	0	100
CTTTGTATGAGCCAC	ATG	AGC	CAC	1	4.99	0	0	0	0	0	100
TACCCAATGTCGCAT	ATG	TCG	CAT	1	4.99	0	0	0	0	0	100
GAGTAGATGAGTCAC	ATG	AGT	CAC	1	4.99	0	0	0	0	0	100
TTTTAGATGAGTCAC	ATG	AGT	CAC	1	4.99	0	0	0	0	0	100
GAAAGTATGTCTCAC	ATG	TCT	CAC	1	4.99	0	0	0	0	0	100
CAGCCCATGTCGCAT	ATG	TCG	CAT	1	4.99	0	0	0	0	0	100
TCACGCATGAGCCAC	ATG	AGC	CAC	1	4.99	0	0	0	0	0	100
CACCCAATGAGCCAC	ATG	AGC	CAC	1	4.99	0	0	0	0	0	100
ACTCACATGTCTCAC	ATG	TCT	CAC	1	4.99	0	0	0	0	0	100
CCGTACATGTCGCAC	ATG	TCG	CAC	1	4.99	0	0	0	0	0	100
TGTGGTATGACTCAC	ATG	ACT	CAC	47	4.28	3.87279	27.3216	44.0707	16.9187	4.52297	3.29329
AGCTATATGACGCAC	ATG	ACG	CAC	55	4.39	0	2.7783	21.2067	67.1656	4.49018	4.35921
GCTATTATGTCGCAG	ATG	TCG	CAG	1	4.99	0	0	0	0	0	100
AGAATCATGTCACAT	ATG	TCA	CAT	1	4.99	0	0	0	0	0	100
GGACCGATGTCACAC	ATG	TCA	CAC	1	4.99	0	0	0	0	0	100
TTTTGGATGTCCCAC	ATG	TCC	CAC	1	4.99	0	0	0	0	0	100
ACGTCTATGTCCCAC	ATG	TCC	CAC	1	4.99	0	0	0	0	0	100
CTGTTGATGTCACCC	ATG	TCA	CCC	1	4.99	0	0	0	0	0	100
GTAATCATGAGCCAT	ATG	AGC	CAT	1	4.99	0	0	0	0	0	100
ATAGTTATGTCGCAT	ATG	TCG	CAT	1	4.99	0	0	0	0	0	100
CCTGGTATGAGCCAC	ATG	AGC	CAC	1	4.99	0	0	0	0	0	100
TGGTCTATGAGTCAC	ATG	AGT	CAC	1	4.99	0	0	0	0	0	100
TCAGTGATGTCCCAG	ATG	TCC	CAG	1	4.99	0	0	0	0	0	100
GCTTCAATGAGTCGT	ATG	AGT	CGT	1	4.99	0	0	0	0	0	100
ACTTATATGTCCCGC	ATG	TCC	CGC	1	4.99	0	0	0	0	0	100
TTTTCAATGTCTCAT	ATG	TCT	CAT	1	4.99	0	0	0	0	0	100
TGTCTAATGTCCCAC	ATG	TCC	CAC	1	4.99	0	0	0	0	0	100
CCGGGTATGAGTCAT	ATG	AGT	CAT	1	4.99	0	0	0	0	0	100
CCGCCTATGTCCCAC	ATG	TCC	CAC	1	4.99	0	0	0	0	0	100
TAGACTATGTCGCAC	ATG	TCG	CAC	1	4.99	0	0	0	0	0	100
TCGGTCATGAGTCAC	ATG	AGT	CAC	1	4.99	0	0	0	0	0	100
CTCGTGATGAGCCAT	ATG	AGC	CAT	1	4.99	0	0	0	0	0	100
TAGACGATGTCACAT	ATG	TCA	CAT	1	4.99	0	0	0	0	0	100
CGCCTTATGAGCCAT	ATG	AGC	CAT	1	4.99	0	0	0	0	0	100
TCGAGGATGAGACAC	ATG	AGA	CAC	52	3.95	63.5167	24.4562	7.76823	0	0	4.25882
AGACGTATGTCACAT	ATG	TCA	CAT	1	4.99	0	0	0	0	0	100
TCAGGTATGACTCAC	ATG	ACT	CAC	43	4.14	44.9381	23.393	2.79143	9.41616	12.5811	6.88028
GTTCTGATGAGTCAT	ATG	AGT	CAT	1	4.99	0	0	0	0	0	100
CTTAGGATGTCGCAT	ATG	TCG	CAT	1	4.99	0	0	0	0	0	100
ACACTGATGAGCCAT	ATG	AGC	CAT	1	4.99	0	0	0	0	0	100
GGCGGGATGAGCCAG	ATG	AGC	CAG	1	4.99	0	0	0	0	0	100
GATCTTATGTCGCAT	ATG	TCG	CAT	1	4.99	0	0	0	0	0	100
CCTTATATGTCCCAC	ATG	TCC	CAC	1	4.99	0	0	0	0	0	100
TCTTCGATGAGTCAT	ATG	AGT	CAT	1	4.99	0	0	0	0	0	100
AGTTATATGAGTCAA	ATG	AGT	CAA	1	4.99	0	0	0	0	0	100
CTAGATATGAGCCAC	ATG	AGC	CAC	1	4.99	0	0	0	0	0	100
TGAGGGATGAGGCAT	ATG	AGG	CAT	37	4.31	1.63287	48.0352	25.4262	12.8835	5.74197	6.28028
TGCGGTATGAGTCCT	ATG	AGT	CCT	1	4.99	0	0	0	0	0	100
GAGATTATGTCACAT	ATG	TCA	CAT	1	4.99	0	0	0	0	0	100
ATACGCATGTCTCAC	ATG	TCT	CAC	1	4.99	0	0	0	0	0	100
ACTCTGATGTCGCAT	ATG	TCG	CAT	1	4.99	0	0	0	0	0	100
ATGCCAATGTCACAC	ATG	TCA	CAC	1	4.99	0	0	0	0	0	100
ACGGCGATGTCGCAT	ATG	TCG	CAT	1	4.99	0	0	0	0	0	100
TTATGAATGTCGCAC	ATG	TCG	CAC	1	4.99	0	0	0	0	0	100
AATGCGATGTCTCAT	ATG	TCT	CAT	1	4.99	0	0	0	0	0	100
GGCAGAATGTCCCTC	ATG	TCC	CTC	1	4.99	0	0	0	0	0	100
TTTAAGATGTCACAC	ATG	TCA	CAC	1	4.99	0	0	0	0	0	100
TTTAAGATGTCACAT	ATG	TCA	CAT	1	4.99	0	0	0	0	0	100
TAATCCATGTCTCAT	ATG	TCT	CAT	1	4.99	0	0	0	0	0	100
CTACTGATGTCTCAC	ATG	TCT	CAC	1	4.99	0	0	0	0	0	100
ACACAAATGAGTCAC	ATG	AGT	CAC	1	4.99	0	0	0	0	0	100
GAAGCGATGTCCCAC	ATG	TCC	CAC	1	4.99	0	0	0	0	0	100
CTTGCGATGAGCCAT	ATG	AGC	CAT	1	4.99	0	0	0	0	0	100
TTCGAAATGTCGCAT	ATG	TCG	CAT	1	4.99	0	0	0	0	0	100
TTCGAAATGTCGCAC	ATG	TCG	CAC	1	4.99	0	0	0	0	0	100
AACCTTATGTCCCAT	ATG	TCC	CAT	1	4.99	0	0	0	0	0	100
AACCGAATGAGCAAC	ATG	AGC	AAC	1	4.99	0	0	0	0	0	100
GGTTATATGTCGCAG	ATG	TCG	CAG	1	4.99	0	0	0	0	0	100
TGCGTCATGTCGCAT	ATG	TCG	CAT	1	4.99	0	0	0	0	0	100
CGATATATGAGTCAT	ATG	AGT	CAT	1	4.99	0	0	0	0	0	100
TTCCGCATGTCACAC	ATG	TCA	CAC	1	4.99	0	0	0	0	0	100
TGCCTCATGTCGCAC	ATG	TCG	CAC	1	4.99	0	0	0	0	0	100
CCGCATATGTCTCAC	ATG	TCT	CAC	1	4.99	0	0	0	0	0	100
TCACACATGTCCCAC	ATG	TCC	CAC	1	4.99	0	0	0	0	0	100
GTGGCGATGACTCAT	ATG	ACT	CAT	44	4.19	42.5058	14.4074	10.9799	9.27576	9.29512	13.536
TTTGATATGTCCCAC	ATG	TCC	CAC	1	4.99	0	0	0	0	0	100
ACGTGGATGAGCCAT	ATG	AGC	CAT	1	4.99	0	0	0	0	0	100
CGGATTATGAGCCAC	ATG	AGC	CAC	1	4.99	0	0	0	0	0	100
GAGGATATGTCACAC	ATG	TCA	CAC	1	4.99	0	0	0	0	0	100
GGACGTATGAGTCAC	ATG	AGT	CAC	1	4.99	0	0	0	0	0	100
TGCCGAATGTCACAC	ATG	TCA	CAC	1	4.99	0	0	0	0	0	100
GATGATATGTCACAC	ATG	TCA	CAC	1	4.99	0	0	0	0	0	100
CTGCTAATGTCCCAC	ATG	TCC	CAC	1	4.99	0	0	0	0	0	100
TAGGTTATGAGCCAC	ATG	AGC	CAC	1	4.99	0	0	0	0	0	100
GCGTAAATGTCGCAG	ATG	TCG	CAG	1	4.99	0	0	0	0	0	100
AATAAGATGTCACGC	ATG	TCA	CGC	1	4.99	0	0	0	0	0	100
AAATTAATGAGTTAT	ATG	AGT	TAT	1	4.99	0	0	0	0	0	100
TGGACAATGAGCCAC	ATG	AGC	CAC	1	4.99	0	0	0	0	0	100
TGCCCTATGAGTCAC	ATG	AGT	CAC	1	4.99	0	0	0	0	0	100
CCGGCGATGTCTCAT	ATG	TCT	CAT	1	4.99	0	0	0	0	0	100
TCGGATATGTCACAC	ATG	TCA	CAC	1	4.99	0	0	0	0	0	100
AAGGTAATGAGCCAT	ATG	AGC	CAT	1	4.99	0	0	0	0	0	100
CCGAGAATGTCTCAC	ATG	TCT	CAC	1	4.99	0	0	0	0	0	100
CCCGGGATGAGCCAT	ATG	AGC	CAT	1	4.99	0	0	0	0	0	100
GGTAGTATGTCGCAG	ATG	TCG	CAG	1	4.99	0	0	0	0	0	100
ACGCGGATGTCACAC	ATG	TCA	CAC	1	4.99	0	0	0	0	0	100
GCTAACATGTCACAT	ATG	TCA	CAT	1	4.99	0	0	0	0	0	100
ACTTGCATGTCACAC	ATG	TCA	CAC	1	4.99	0	0	0	0	0	100
TGGGGCATGACGCAT	ATG	ACG	CAT	51	4.37	0	5.96013	21.2962	64.73	8.01362	0
CTCGCGATGTCGCAT	ATG	TCG	CAT	1	4.99	0	0	0	0	0	100
CATGTGATGAGTCAC	ATG	AGT	CAC	1	4.99	0	0	0	0	0	100
CGCGTCATGTCGCTC	ATG	TCG	CTC	1	4.99	0	0	0	0	0	100
GCGATCATGTCACAC	ATG	TCA	CAC	1	4.99	0	0	0	0	0	100
AGTTAGATGTCCCAT	ATG	TCC	CAT	1	4.99	0	0	0	0	0	100
CAACGGATGTGTCAT	ATG	TGT	CAT	28	4.37	6.67316	39.8441	13.8091	11.6659	19.4837	8.52411
CCCTTGATGTCACAC	ATG	TCA	CAC	1	4.99	0	0	0	0	0	100
TGTAGTATGTCACAT	ATG	TCA	CAT	1	4.99	0	0	0	0	0	100
TCGATCATGTCACAC	ATG	TCA	CAC	1	4.99	0	0	0	0	0	100
CTCGAAATGAGTCAC	ATG	AGT	CAC	1	4.99	0	0	0	0	0	100
TATCTTATGTCTCAC	ATG	TCT	CAC	1	4.99	0	0	0	0	0	100
ACGGAGATGAGCCAC	ATG	AGC	CAC	1	4.99	0	0	0	0	0	100
AAAGCAATGTCCCAC	ATG	TCC	CAC	1	4.99	0	0	0	0	0	100
TTGTGGATGTGTCAT	ATG	TGT	CAT	36	4.11	41.296	13.4342	19.1917	16.2113	7.22511	2.64168
TAGGACATGAGTCAT	ATG	AGT	CAT	1	4.99	0	0	0	0	0	100
TAGGACATGAGTCAC	ATG	AGT	CAC	1	4.99	0	0	0	0	0	100
GAGTTAATGTCACAT	ATG	TCA	CAT	1	4.99	0	0	0	0	0	100
ACGCCTATGTCCCAT	ATG	TCC	CAT	1	4.99	0	0	0	0	0	100
TCCTAGATGAGCCAC	ATG	AGC	CAC	1	4.99	0	0	0	0	0	100
ATACTTATGTCACAT	ATG	TCA	CAT	1	4.99	0	0	0	0	0	100
GATTTAATGACTCAT	ATG	ACT	CAT	35	4.2	26.5737	17.2768	8.23165	41.7199	6.19795	0
GTACGCATGAGCCAC	ATG	AGC	CAC	1	4.99	0	0	0	0	0	100
GTGGGAATGTGTCAC	ATG	TGT	CAC	45	4.43	0	0	15.9752	67.4521	12.6268	3.94589
TCACGAATGACTCAT	ATG	ACT	CAT	45	4.72	1.39957	4.56783	6.53645	14.7185	36.9271	35.8505
TGTCATATGTCACAC	ATG	TCA	CAC	1	4.99	0	0	0	0	0	100
ACGTTTATGTCGTAC	ATG	TCG	TAC	1	4.99	0	0	0	0	0	100
GTGGGAATGAGGCAC	ATG	AGG	CAC	52	4.41	0	4.8568	30.8614	44.3101	17.4344	2.5373
TTCCAAATGTCTCAT	ATG	TCT	CAT	1	4.99	0	0	0	0	0	100
GGCCCAATGAGCCAC	ATG	AGC	CAC	1	4.99	0	0	0	0	0	100
ACAGTTATGTCACAT	ATG	TCA	CAT	1	4.99	0	0	0	0	0	100
ACGGTTATGAGCCAC	ATG	AGC	CAC	1	4.99	0	0	0	0	0	100
TCATTCATGTCGCAT	ATG	TCG	CAT	1	4.99	0	0	0	0	0	100
CTGGACATGAGCCAT	ATG	AGC	CAT	1	4.99	0	0	0	0	0	100
AACTGTATGAGCCAT	ATG	AGC	CAT	1	4.99	0	0	0	0	0	100
GAGCCTATGAGTCAC	ATG	AGT	CAC	1	4.99	0	0	0	0	0	100
GTCTGGATGAGGCAT	ATG	AGG	CAT	25	4.24	10.2035	33.1754	35.545	13.3538	4.46055	3.26178
TCAAGCATGTCGCAC	ATG	TCG	CAC	1	4.99	0	0	0	0	0	100
AAGGTAATGTCACCC	ATG	TCA	CCC	1	4.99	0	0	0	0	0	100
AGGCTTATGTCTCAC	ATG	TCT	CAC	1	4.99	0	0	0	0	0	100
ACAAACATGTCGCAC	ATG	TCG	CAC	1	4.99	0	0	0	0	0	100
TAGTCAATGAGTCAC	ATG	AGT	CAC	1	4.99	0	0	0	0	0	100
TTACTCATGTCACCT	ATG	TCA	CCT	1	4.99	0	0	0	0	0	100
TCGAGGAGGAGTCAC	AGG	AGT	CAC	32	4.25	21.7466	12.8621	21.444	31.0419	10.3761	2.52918
AGGCAGATGAGCCAC	ATG	AGC	CAC	1	4.99	0	0	0	0	0	100
GTCTGTATGTCCCAT	ATG	TCC	CAT	1	4.99	0	0	0	0	0	100
TGGATAATGTCGCAC	ATG	TCG	CAC	1	4.99	0	0	0	0	0	100
TATGTGATGAGCCAC	ATG	AGC	CAC	1	4.99	0	0	0	0	0	100
AGTCTTATGTCCCAT	ATG	TCC	CAT	1	4.99	0	0	0	0	0	100
CACGCAATGAGTCAC	ATG	AGT	CAC	1	4.99	0	0	0	0	0	100
CTCGACATGTCACAC	ATG	TCA	CAC	1	4.99	0	0	0	0	0	100
CTCTGGATGAGCCAT	ATG	AGC	CAT	1	4.99	0	0	0	0	0	100
TTCAACATGAGTCAC	ATG	AGT	CAC	1	4.99	0	0	0	0	0	100
GACTGTATGTCCCAT	ATG	TCC	CAT	1	4.99	0	0	0	0	0	100
ACGAAAATGTCGCAT	ATG	TCG	CAT	1	4.99	0	0	0	0	0	100
GCCCTCATGTCGCAT	ATG	TCG	CAT	1	4.99	0	0	0	0	0	100
AGAAGTATGTCCCAT	ATG	TCC	CAT	1	4.99	0	0	0	0	0	100
TAGAGAATGTCGCAC	ATG	TCG	CAC	1	4.99	0	0	0	0	0	100
GTGATTATGACCCAT	ATG	ACC	CAT	42	4.86	0	5.43458	0	8.76487	17.5663	68.2342
ATATATATGAGCCAC	ATG	AGC	CAC	1	4.99	0	0	0	0	0	100
AGGTGTATGAGTCAT	ATG	AGT	CAT	1	4.99	0	0	0	0	0	100
GTTATTATGAGTCAT	ATG	AGT	CAT	1	4.99	0	0	0	0	0	100
ATTTGCATGTCACAT	ATG	TCA	CAT	1	4.99	0	0	0	0	0	100
AAATTTATGAGTCAT	ATG	AGT	CAT	1	4.99	0	0	0	0	0	100
TAGCAGATGAGTCAT	ATG	AGT	CAT	1	4.99	0	0	0	0	0	100
CAGCCGATGAGCCAT	ATG	AGC	CAT	1	4.99	0	0	0	0	0	100
AAGGAAATGAGCCAT	ATG	AGC	CAT	1	4.99	0	0	0	0	0	100
AGGATTATGAGCCAT	ATG	AGC	CAT	1	4.99	0	0	0	0	0	100
GGACCTATGTCGCAC	ATG	TCG	CAC	1	4.99	0	0	0	0	0	100
GATCAAATGTCTCAC	ATG	TCT	CAC	1	4.99	0	0	0	0	0	100
TGAGACATGTCACAC	ATG	TCA	CAC	1	4.99	0	0	0	0	0	100
GGCCAGATGTCGCAT	ATG	TCG	CAT	1	4.99	0	0	0	0	0	100
TTTATTATGTCCCAT	ATG	TCC	CAT	1	4.99	0	0	0	0	0	100
CTCCCGATGTCCCAC	ATG	TCC	CAC	1	4.99	0	0	0	0	0	100
ACAGATATGTCCCAT	ATG	TCC	CAT	1	4.99	0	0	0	0	0	100
GGCTGTATGACTCAC	ATG	ACT	CAC	47	4.46	0	0	25.2434	48.3139	20.9095	5.53313
TTACGCATGAGTTAC	ATG	AGT	TAC	1	4.99	0	0	0	0	0	100
ACTTAGATGTCGCAT	ATG	TCG	CAT	1	4.99	0	0	0	0	0	100
GTACGAATGAGCCAT	ATG	AGC	CAT	1	4.99	0	0	0	0	0	100
TGGGTTATGACCCAT	ATG	ACC	CAT	45	4.56	0	0	5.17535	58.2927	19.4959	17.036
AGGGTTATGAGTCAC	ATG	AGT	CAC	1	4.99	0	0	0	0	0	100
AATCGCATGAGTCAC	ATG	AGT	CAC	1	4.99	0	0	0	0	0	100
GCGGCTATGTCACAC	ATG	TCA	CAC	1	4.99	0	0	0	0	0	100
AAACGTATGTCTCAC	ATG	TCT	CAC	1	4.99	0	0	0	0	0	100
TGTCCTATGAGTCAC	ATG	AGT	CAC	1	4.99	0	0	0	0	0	100
CAACGGATGACTCAC	ATG	ACT	CAC	33	4.2	18.82	40.7958	25.9319	5.46536	3.65882	5.32815
AAGACCATGAGCCAC	ATG	AGC	CAC	1	4.99	0	0	0	0	0	100
TATTTTATGAGCCAT	ATG	AGC	CAT	1	4.99	0	0	0	0	0	100
TTTTGCATGTCTCAC	ATG	TCT	CAC	1	4.99	0	0	0	0	0	100
CAACTCATGTCCCAT	ATG	TCC	CAT	1	4.99	0	0	0	0	0	100
GTGTCAATGAGTCAC	ATG	AGT	CAC	1	4.99	0	0	0	0	0	100
CTGCTAATGTCACAC	ATG	TCA	CAC	1	4.99	0	0	0	0	0	100
AAACGTATGTCCCAC	ATG	TCC	CAC	1	4.99	0	0	0	0	0	100
TTCCATATGACGCAT	ATG	ACG	CAT	52	4.31	0	23.1969	44.2218	22.9809	9.60038	0
CCGTATATGAGTCAC	ATG	AGT	CAC	1	4.99	0	0	0	0	0	100
TCCATGATGTCCCAG	ATG	TCC	CAG	1	4.99	0	0	0	0	0	100
TGTCGAATGTCTCAC	ATG	TCT	CAC	1	4.99	0	0	0	0	0	100
CACAGAATGAGTCAC	ATG	AGT	CAC	1	4.99	0	0	0	0	0	100
CGATTCATGTCTCAC	ATG	TCT	CAC	1	4.99	0	0	0	0	0	100
TACTCAATGTCCCGC	ATG	TCC	CGC	1	4.99	0	0	0	0	0	100
GGACTCATGTCTCAC	ATG	TCT	CAC	1	4.99	0	0	0	0	0	100
ATCAGAATGAGTCAC	ATG	AGT	CAC	1	4.99	0	0	0	0	0	100
TGTTTCATGAGCCAT	ATG	AGC	CAT	1	4.99	0	0	0	0	0	100
TACGGGATGTCACAT	ATG	TCA	CAT	1	4.99	0	0	0	0	0	100
TGCAGAATGAGCCAG	ATG	AGC	CAG	1	4.99	0	0	0	0	0	100
CGTAAGATGTCTCAT	ATG	TCT	CAT	1	4.99	0	0	0	0	0	100
GCCCTAATGTCTCAT	ATG	TCT	CAT	1	4.99	0	0	0	0	0	100
TGTTAGATGTCCCAT	ATG	TCC	CAT	1	4.99	0	0	0	0	0	100
TGTCCAATGAGCCAC	ATG	AGC	CAC	1	4.99	0	0	0	0	0	100
AAGGTGATGAGCCAA	ATG	AGC	CAA	1	4.99	0	0	0	0	0	100
CCATCGATGAGCCAC	ATG	AGC	CAC	1	4.99	0	0	0	0	0	100
TCACGAATGAGCAAT	ATG	AGC	AAT	1	4.99	0	0	0	0	0	100
ATTTTGATGTCGCAC	ATG	TCG	CAC	1	4.99	0	0	0	0	0	100
CTGATTATGTCCCAT	ATG	TCC	CAT	1	4.99	0	0	0	0	0	100
TCTAGTATGTCGCAC	ATG	TCG	CAC	1	4.99	0	0	0	0	0	100
GGGCCGATGTCGTAT	ATG	TCG	TAT	1	4.99	0	0	0	0	0	100
CAGTCTATGTCGCAC	ATG	TCG	CAC	1	4.99	0	0	0	0	0	100
TCCGTCATGTCACAT	ATG	TCA	CAT	1	4.99	0	0	0	0	0	100
GTGGTTATGTCTCAG	ATG	TCT	CAG	1	4.99	0	0	0	0	0	100
AAGTTCATGAGTCAC	ATG	AGT	CAC	1	4.99	0	0	0	0	0	100
CTGCATATGTCACAC	ATG	TCA	CAC	1	4.99	0	0	0	0	0	100
ACCTTCATGAGCCAT	ATG	AGC	CAT	1	4.99	0	0	0	0	0	100
ACCTTCATGAGCCAC	ATG	AGC	CAC	1	4.99	0	0	0	0	0	100
TTGTATATGTCACAC	ATG	TCA	CAC	1	4.99	0	0	0	0	0	100
GACTCCATGTCACAT	ATG	TCA	CAT	1	4.99	0	0	0	0	0	100
GAGGCAATGAGCCAC	ATG	AGC	CAC	1	4.99	0	0	0	0	0	100
AGATCCATGAGCCAT	ATG	AGC	CAT	1	4.99	0	0	0	0	0	100
TCTCGTATGTCTCAT	ATG	TCT	CAT	1	4.99	0	0	0	0	0	100
TTCTGGATGTCACAT	ATG	TCA	CAT	1	4.99	0	0	0	0	0	100
AGATCCATGAGCCAC	ATG	AGC	CAC	1	4.99	0	0	0	0	0	100
CTTAGGATGTCACAC	ATG	TCA	CAC	1	4.99	0	0	0	0	0	100
CGTCACATGTCGCAC	ATG	TCG	CAC	1	4.99	0	0	0	0	0	100
GACGAAATGAGTCAC	ATG	AGT	CAC	1	4.99	0	0	0	0	0	100
ACTGACATGAGTCAT	ATG	AGT	CAT	1	4.99	0	0	0	0	0	100
TTCCCGATGAGTCAC	ATG	AGT	CAC	1	4.99	0	0	0	0	0	100
GCACGAATGAGCCAT	ATG	AGC	CAT	1	4.99	0	0	0	0	0	100
GAGGGCATGACTCAC	ATG	ACT	CAC	44	4.72	0	4.43681	2.1213	21.452	40.6483	31.3415
GAACTCATGTCACAT	ATG	TCA	CAT	1	4.99	0	0	0	0	0	100
TTTCTTATGAGCCAC	ATG	AGC	CAC	1	4.99	0	0	0	0	0	100
TTTCTTATGAGCCAT	ATG	AGC	CAT	1	4.99	0	0	0	0	0	100
ATGGATATGTCCCAG	ATG	TCC	CAG	1	4.99	0	0	0	0	0	100
CCGTGTATGTCACAC	ATG	TCA	CAC	1	4.99	0	0	0	0	0	100
GCGGACATGAGCCAT	ATG	AGC	CAT	1	4.99	0	0	0	0	0	100
TGACGCATGTCACCC	ATG	TCA	CCC	1	4.99	0	0	0	0	0	100
GAGTGTATGTCCCGT	ATG	TCC	CGT	1	4.99	0	0	0	0	0	100
ATACGGATGTCTCAT	ATG	TCT	CAT	1	4.99	0	0	0	0	0	100
CCGGGAATGAGCCAT	ATG	AGC	CAT	1	4.99	0	0	0	0	0	100
GACTGCATGAGTCTT	ATG	AGT	CTT	1	4.99	0	0	0	0	0	100
GCATTAATGAGTCAC	ATG	AGT	CAC	1	4.99	0	0	0	0	0	100
TTTAGTATGAGCCAT	ATG	AGC	CAT	1	4.99	0	0	0	0	0	100
ATGAAGATGAGTCAT	ATG	AGT	CAT	1	4.99	0	0	0	0	0	100
TCGCTCATGTCCCAT	ATG	TCC	CAT	1	4.99	0	0	0	0	0	100
TATGCCATGAGTTAT	ATG	AGT	TAT	1	4.99	0	0	0	0	0	100
CTTCCCATGAGTCAC	ATG	AGT	CAC	1	4.99	0	0	0	0	0	100
GTCTGAATGTCACAT	ATG	TCA	CAT	1	4.99	0	0	0	0	0	100
GCTCTTATGAGTCAT	ATG	AGT	CAT	1	4.99	0	0	0	0	0	100
GCGTCTATGTCCCAT	ATG	TCC	CAT	1	4.99	0	0	0	0	0	100
GCCGGAATGAGTCAT	ATG	AGT	CAT	1	4.99	0	0	0	0	0	100
ACGCCGATGTCCCAC	ATG	TCC	CAC	1	4.99	0	0	0	0	0	100
GCTGGTATGAGCAAT	ATG	AGC	AAT	1	4.99	0	0	0	0	0	100
GCGCAGATGTCCCAC	ATG	TCC	CAC	1	4.99	0	0	0	0	0	100
ACAGCGATGTCTCAT	ATG	TCT	CAT	1	4.99	0	0	0	0	0	100
AACATCATGAGCTAT	ATG	AGC	TAT	1	4.99	0	0	0	0	0	100
AGTTATATGTCGCGT	ATG	TCG	CGT	1	4.99	0	0	0	0	0	100
CGCGAAATGAGTCAC	ATG	AGT	CAC	1	4.99	0	0	0	0	0	100
CTAAGCATGAGTCAC	ATG	AGT	CAC	1	4.99	0	0	0	0	0	100
GTTTCGATGAGTCAT	ATG	AGT	CAT	1	4.99	0	0	0	0	0	100
ACATAAATGAGCCAT	ATG	AGC	CAT	1	4.99	0	0	0	0	0	100
AGCGTAATGACCCAT	ATG	ACC	CAT	49	4.32	0	21.9111	36.5512	35.2739	1.96512	4.2987
AGTCCAATGTCCCAC	ATG	TCC	CAC	1	4.99	0	0	0	0	0	100
TGCCCTATGTCGTAC	ATG	TCG	TAC	1	4.99	0	0	0	0	0	100
GAGACGATGAGTCAT	ATG	AGT	CAT	1	4.99	0	0	0	0	0	100
TGTGTGATGTCGCAG	ATG	TCG	CAG	1	4.99	0	0	0	0	0	100
TATATAATGTCGCAC	ATG	TCG	CAC	1	4.99	0	0	0	0	0	100
TAAAGAATGTCCCAC	ATG	TCC	CAC	1	4.99	0	0	0	0	0	100
CGGCATATGAGCCAT	ATG	AGC	CAT	1	4.99	0	0	0	0	0	100
TCGTACATGAGCCAC	ATG	AGC	CAC	1	4.99	0	0	0	0	0	100
CGGCCTATGAGTCAT	ATG	AGT	CAT	1	4.99	0	0	0	0	0	100
TGGTAAATGTCACAC	ATG	TCA	CAC	1	4.99	0	0	0	0	0	100
CTGACTATGTCGCAT	ATG	TCG	CAT	1	4.99	0	0	0	0	0	100
AAGCGTATGTCCCAC	ATG	TCC	CAC	1	4.99	0	0	0	0	0	100
ATGTAGATGTCACAT	ATG	TCA	CAT	1	4.99	0	0	0	0	0	100
CACTCAATGAGTCAC	ATG	AGT	CAC	1	4.99	0	0	0	0	0	100
CGAGTAATGTCACAC	ATG	TCA	CAC	1	4.99	0	0	0	0	0	100
ACCGGGATGTCTCAC	ATG	TCT	CAC	1	4.99	0	0	0	0	0	100
TGAGTGATGTCCCAA	ATG	TCC	CAA	1	4.99	0	0	0	0	0	100
GCTGCGATGTCACAT	ATG	TCA	CAT	1	4.99	0	0	0	0	0	100
TATCGGATGTCCCAG	ATG	TCC	CAG	1	4.99	0	0	0	0	0	100
TGTGGTATGTCAAAT	ATG	TCA	AAT	1	4.99	0	0	0	0	0	100
ATTTCCATGAGCCAC	ATG	AGC	CAC	1	4.99	0	0	0	0	0	100
CCTGGGATGTCCCGT	ATG	TCC	CGT	1	4.99	0	0	0	0	0	100
TGGCGCATGAGTCAC	ATG	AGT	CAC	1	4.99	0	0	0	0	0	100
TTCCCTATGTCCCAC	ATG	TCC	CAC	1	4.99	0	0	0	0	0	100
AGTAACATGTCGCAC	ATG	TCG	CAC	1	4.99	0	0	0	0	0	100
AGTAACATGTCGCAT	ATG	TCG	CAT	1	4.99	0	0	0	0	0	100
TCTCTTATGAGCCAT	ATG	AGC	CAT	1	4.99	0	0	0	0	0	100
GTAGCAATGAGTCCT	ATG	AGT	CCT	1	4.99	0	0	0	0	0	100
AACAAGATGTCCCAT	ATG	TCC	CAT	1	4.99	0	0	0	0	0	100
TGGGGTATGACGCAC	ATG	ACG	CAC	47	4.45	0	3.34271	15.9482	59.2572	16.2071	5.24479
CAGCGAATGTCACAT	ATG	TCA	CAT	1	4.99	0	0	0	0	0	100
CAGCGAATGTCACAC	ATG	TCA	CAC	1	4.99	0	0	0	0	0	100
CGGGACATGAGCCAT	ATG	AGC	CAT	1	4.99	0	0	0	0	0	100
CACGCGATGTCACAT	ATG	TCA	CAT	1	4.99	0	0	0	0	0	100
CACGCGATGTCACAC	ATG	TCA	CAC	1	4.99	0	0	0	0	0	100
CTAGTAATGAGTCAT	ATG	AGT	CAT	1	4.99	0	0	0	0	0	100
CTAATGATGAGTCAC	ATG	AGT	CAC	1	4.99	0	0	0	0	0	100
CTCAGCATGTCATAC	ATG	TCA	TAC	1	4.99	0	0	0	0	0	100
TATGCAATGTCCCGT	ATG	TCC	CGT	1	4.99	0	0	0	0	0	100
CCGGCGATGTCCCAC	ATG	TCC	CAC	1	4.99	0	0	0	0	0	100
GCTTGGATGACTCAC	ATG	ACT	CAC	20	4.18	27.5499	28.0015	15.9955	18.0279	6.02183	4.40346
AAGCCAATGTCCCAC	ATG	TCC	CAC	1	4.99	0	0	0	0	0	100
GGTAACATGAGCCAC	ATG	AGC	CAC	1	4.99	0	0	0	0	0	100
GCCTTCATGTCGCAT	ATG	TCG	CAT	1	4.99	0	0	0	0	0	100
TTTAGTATGTCCCAC	ATG	TCC	CAC	1	4.99	0	0	0	0	0	100
TGTAAGATGAGTAAT	ATG	AGT	AAT	1	4.99	0	0	0	0	0	100
TTATAGATGAGCCAC	ATG	AGC	CAC	1	4.99	0	0	0	0	0	100
TTTAACATGAGTCAC	ATG	AGT	CAC	1	4.99	0	0	0	0	0	100
TCAATCATGTCCCAT	ATG	TCC	CAT	1	4.99	0	0	0	0	0	100
CAAAGCATGTCCCAC	ATG	TCC	CAC	1	4.99	0	0	0	0	0	100
CAAAGCATGTCCCAT	ATG	TCC	CAT	1	4.99	0	0	0	0	0	100
TGACTCATGTCCCAC	ATG	TCC	CAC	1	4.99	0	0	0	0	0	100
CCTAGAATGAGTCAT	ATG	AGT	CAT	1	4.99	0	0	0	0	0	100
CCGGAGATGTCACAT	ATG	TCA	CAT	1	4.99	0	0	0	0	0	100
TGACCGATGTCACAT	ATG	TCA	CAT	1	4.99	0	0	0	0	0	100
TCTGGCATGTCGCAC	ATG	TCG	CAC	1	4.99	0	0	0	0	0	100
CAGTAAATGTCACAT	ATG	TCA	CAT	1	4.99	0	0	0	0	0	100
CAGCGCATGAGTCAC	ATG	AGT	CAC	1	4.99	0	0	0	0	0	100
TGCTATATGAGTTAC	ATG	AGT	TAC	1	4.99	0	0	0	0	0	100
CTTGCAATGAGCCAT	ATG	AGC	CAT	1	4.99	0	0	0	0	0	100
ACGAAAATGAGTCAT	ATG	AGT	CAT	1	4.99	0	0	0	0	0	100
TTTCCAATGTCCCAT	ATG	TCC	CAT	1	4.99	0	0	0	0	0	100
AAGACTATGAGTCAT	ATG	AGT	CAT	1	4.99	0	0	0	0	0	100
AGAAACATGTCGGAT	ATG	TCG	GAT	1	4.99	0	0	0	0	0	100
TTATACATGAGTCAT	ATG	AGT	CAT	1	4.99	0	0	0	0	0	100
CGGGTTATGACTCAT	ATG	ACT	CAT	31	4.33	0	46.4558	13.845	28.0414	9.37317	2.28471
CTGGGTATGAGCCAC	ATG	AGC	CAC	1	4.99	0	0	0	0	0	100
AAGCTTATGTCACAT	ATG	TCA	CAT	1	4.99	0	0	0	0	0	100
AAGTACATGAGTCAC	ATG	AGT	CAC	1	4.99	0	0	0	0	0	100
AACGTCATGTCCCAG	ATG	TCC	CAG	1	4.99	0	0	0	0	0	100
TATAGTATGAGTCAT	ATG	AGT	CAT	1	4.99	0	0	0	0	0	100
GAATCGATGAGTCAT	ATG	AGT	CAT	1	4.99	0	0	0	0	0	100
TGACCTATGACTCAT	ATG	ACT	CAT	21	4.28	14.259	23.2137	17.6911	29.8596	14.9766	0
ATACCGATGAGCCAT	ATG	AGC	CAT	1	4.99	0	0	0	0	0	100
AAATTCATGAGTCAT	ATG	AGT	CAT	1	4.99	0	0	0	0	0	100
GGTGTTATGACCCAT	ATG	ACC	CAT	37	4.57	0	4.5082	4.29569	47.2222	31.5877	12.3862
TGCCACATGTCCCAT	ATG	TCC	CAT	1	4.99	0	0	0	0	0	100
GTCTATATGTCCCAT	ATG	TCC	CAT	1	4.99	0	0	0	0	0	100
AGCCGCATGAGGCAT	ATG	AGG	CAT	47	4.3	0	30.9689	45.2388	13.2843	8.88395	1.6241
GTACCAATGAGCCCC	ATG	AGC	CCC	1	4.99	0	0	0	0	0	100
ACACAAATGTCGCAT	ATG	TCG	CAT	1	4.99	0	0	0	0	0	100
CCTGGTATGTCACAT	ATG	TCA	CAT	1	4.99	0	0	0	0	0	100
CGATCAATGAGCCAT	ATG	AGC	CAT	1	4.99	0	0	0	0	0	100
CGAGCAATGAGCCAC	ATG	AGC	CAC	1	4.99	0	0	0	0	0	100
GCACTAATGAGCCAT	ATG	AGC	CAT	1	4.99	0	0	0	0	0	100
CGGTCTATGAGCCAC	ATG	AGC	CAC	1	4.99	0	0	0	0	0	100
GTAGCCATGTCGCAG	ATG	TCG	CAG	1	4.99	0	0	0	0	0	100
CCATGGATGACTCAC	ATG	ACT	CAC	39	4.02	58.8941	3.30891	9.43815	21.2525	7.10637	0
TAGTACATGTCGCAC	ATG	TCG	CAC	1	4.99	0	0	0	0	0	100
GTAACTATGTCGCAT	ATG	TCG	CAT	1	4.99	0	0	0	0	0	100
ACGCCGATGTCTCAT	ATG	TCT	CAT	1	4.99	0	0	0	0	0	100
GCTATAATGCGTCAC	ATG	CGT	CAC	37	4.77	0	0	0	21.6221	40.4805	37.8974
GTCCTTATGACTCAC	ATG	ACT	CAC	34	4.34	0	27.7241	21.6065	40.5524	8.13421	1.98271
CAGTTCATGAGCCAC	ATG	AGC	CAC	1	4.99	0	0	0	0	0	100
CAGTCTATGTCCCAC	ATG	TCC	CAC	1	4.99	0	0	0	0	0	100
GGTCTCATGAGTCAC	ATG	AGT	CAC	1	4.99	0	0	0	0	0	100
CAGATGATGAGCCAT	ATG	AGC	CAT	1	4.99	0	0	0	0	0	100
CGGCACATGTCGCAC	ATG	TCG	CAC	1	4.99	0	0	0	0	0	100
TTCCACATGTCCCAT	ATG	TCC	CAT	1	4.99	0	0	0	0	0	100
CTGACCATGAGCCAC	ATG	AGC	CAC	1	4.99	0	0	0	0	0	100
AGGGCAATGACTCAT	ATG	ACT	CAT	42	4.42	0	1.95615	27.9113	50.2691	16.8045	3.05895
GCGCATATGAGCCAT	ATG	AGC	CAT	1	4.99	0	0	0	0	0	100
TTATATATGTCGCAC	ATG	TCG	CAC	1	4.99	0	0	0	0	0	100
TCCGTCATGTCCCAT	ATG	TCC	CAT	1	4.99	0	0	0	0	0	100
GTATTTATGAGTCTT	ATG	AGT	CTT	1	4.99	0	0	0	0	0	100
AGTTTAATGAGCCAT	ATG	AGC	CAT	1	4.99	0	0	0	0	0	100
TCCCGTATGAGTCAC	ATG	AGT	CAC	1	4.99	0	0	0	0	0	100
ACTGGCATGAGCCAT	ATG	AGC	CAT	1	4.99	0	0	0	0	0	100
ATGGCAATGAGCCAC	ATG	AGC	CAC	1	4.99	0	0	0	0	0	100
AAACTTATGAGTCAC	ATG	AGT	CAC	1	4.99	0	0	0	0	0	100
ATAGAAATGAGCCAC	ATG	AGC	CAC	1	4.99	0	0	0	0	0	100
ATACTAATGTCCCAT	ATG	TCC	CAT	1	4.99	0	0	0	0	0	100
GTGGCCATGACCCAT	ATG	ACC	CAT	40	4.76	0	0	0	27.9167	29.35	42.7333
TCCCGTATGAGCCAC	ATG	AGC	CAC	1	4.99	0	0	0	0	0	100
AGAGATATGAGTCAT	ATG	AGT	CAT	1	4.99	0	0	0	0	0	100
GCTCCCATGTCGCAC	ATG	TCG	CAC	1	4.99	0	0	0	0	0	100
TTACACATGTCCCAC	ATG	TCC	CAC	1	4.99	0	0	0	0	0	100
TTTGCGATGAGTCAG	ATG	AGT	CAG	1	4.99	0	0	0	0	0	100
TGTAGGATGAGGCAT	ATG	AGG	CAT	35	4.32	0	31.772	32.805	25.5744	5.69902	4.1496
TTGGACATGAGTCAC	ATG	AGT	CAC	1	4.99	0	0	0	0	0	100
TCGGGTATGACGCAT	ATG	ACG	CAT	42	4.37	0	4.06182	38.7582	45.8288	6.56455	4.78665
CTAGACATGAGCCAC	ATG	AGC	CAC	1	4.99	0	0	0	0	0	100
TGCGGGATGAGACAC	ATG	AGA	CAC	33	4.13	45.3509	14.7533	3.52095	23.7292	3.96727	8.6784
ACTTGCATGTCCCAC	ATG	TCC	CAC	1	4.99	0	0	0	0	0	100
CAAGTTATGTCGCAC	ATG	TCG	CAC	1	4.99	0	0	0	0	0	100
ATATTCATGAGTCAT	ATG	AGT	CAT	1	4.99	0	0	0	0	0	100
TGTCAGATGTCACCT	ATG	TCA	CCT	1	4.99	0	0	0	0	0	100
CGGGACATGAGTCAC	ATG	AGT	CAC	1	4.99	0	0	0	0	0	100
GTCGCTATGTCGCCT	ATG	TCG	CCT	1	4.99	0	0	0	0	0	100
GCCGTTATGAGCCAC	ATG	AGC	CAC	1	4.99	0	0	0	0	0	100
GACGCAATGTCCCAC	ATG	TCC	CAC	1	4.99	0	0	0	0	0	100
TCAGTAATGTCACTC	ATG	TCA	CTC	1	4.99	0	0	0	0	0	100
TTGTGGATGCGTCAT	ATG	CGT	CAT	37	3.79	91.5094	8.49057	0	0	0	0
TAAGCTATGTCACAC	ATG	TCA	CAC	1	4.99	0	0	0	0	0	100
CATTGTATGACTCAC	ATG	ACT	CAC	44	4.29	1.27184	29.0985	35.6534	30.1048	2.2362	1.63522
TATTTCATGTCACAT	ATG	TCA	CAT	1	4.99	0	0	0	0	0	100
CTCACCATGTCACAT	ATG	TCA	CAT	1	4.99	0	0	0	0	0	100
GATGCCATGTCGCAC	ATG	TCG	CAC	1	4.99	0	0	0	0	0	100
GCCTTTATGTCTCAT	ATG	TCT	CAT	1	4.99	0	0	0	0	0	100
GCAGGAATGTCACAC	ATG	TCA	CAC	1	4.99	0	0	0	0	0	100
ATTTTTATGTCACCC	ATG	TCA	CCC	1	4.99	0	0	0	0	0	100
GGTGCTATGTCACGT	ATG	TCA	CGT	1	4.99	0	0	0	0	0	100
CGTTAGATGAGCCAT	ATG	AGC	CAT	1	4.99	0	0	0	0	0	100
TTGCTCATGAGTCAC	ATG	AGT	CAC	1	4.99	0	0	0	0	0	100
AGGTCCATGACACAT	ATG	ACA	CAT	25	4.24	2.36057	38.5733	40.441	18.6252	0	0
AATGTTATGAGCCAT	ATG	AGC	CAT	1	4.99	0	0	0	0	0	100
TCCTAGATGTCTCAT	ATG	TCT	CAT	1	4.99	0	0	0	0	0	100
CCAACAATGAGTCAC	ATG	AGT	CAC	1	4.99	0	0	0	0	0	100
CGCCTGATGTCGCAC	ATG	TCG	CAC	1	4.99	0	0	0	0	0	100
GTGCAGATGTCACAC	ATG	TCA	CAC	1	4.99	0	0	0	0	0	100
TTTTTGATGAGCCAG	ATG	AGC	CAG	1	4.99	0	0	0	0	0	100
CATATGATGTCTCAT	ATG	TCT	CAT	1	4.99	0	0	0	0	0	100
CCTAGTATGTCCCAT	ATG	TCC	CAT	1	4.99	0	0	0	0	0	100
AGTTACATGAGGCAC	ATG	AGG	CAC	39	4.3	0	14.5942	57.9679	19.5844	7.8534	0
GCGCCTATGAGTCAT	ATG	AGT	CAT	1	4.99	0	0	0	0	0	100
ATCGGGATGAGCCAT	ATG	AGC	CAT	1	4.99	0	0	0	0	0	100
TCGGGAATGTCCCAC	ATG	TCC	CAC	1	4.99	0	0	0	0	0	100
GGGTTCATGACTCAT	ATG	ACT	CAT	30	4.12	37.0755	18.8545	10.7704	30.3345	0	2.96503
TATGGTATGTCGCAT	ATG	TCG	CAT	1	4.99	0	0	0	0	0	100
GCCCTCATGAGCCTT	ATG	AGC	CTT	1	4.99	0	0	0	0	0	100
TCACGAATGTCACAT	ATG	TCA	CAT	1	4.99	0	0	0	0	0	100
TGTGGCATGACTCAC	ATG	ACT	CAC	25	4.39	6.84829	18.5954	17.7206	29.9175	23.994	2.92427
GTGGCCATGAGCAAT	ATG	AGC	AAT	1	4.99	0	0	0	0	0	100
TCCGTAATGTCACAC	ATG	TCA	CAC	1	4.99	0	0	0	0	0	100
CTGGCAATGAGCTAT	ATG	AGC	TAT	1	4.99	0	0	0	0	0	100
ATTTTGATGAGCCAC	ATG	AGC	CAC	1	4.99	0	0	0	0	0	100
TACGAAATGTCTCAC	ATG	TCT	CAC	1	4.99	0	0	0	0	0	100
AGGTAAATGTCCCAC	ATG	TCC	CAC	1	4.99	0	0	0	0	0	100
GGGTGTATGACCCAT	ATG	ACC	CAT	35	4.35	29.7872	3.23491	9.2271	20.7772	24.3161	12.6574
ACTTCGATGAGTCAT	ATG	AGT	CAT	1	4.99	0	0	0	0	0	100
TAGGCTATGACCCAC	ATG	ACC	CAC	27	4.74	2.36057	0	3.68353	24.8249	20.7523	48.3787
CCAGGTATGTCCCAT	ATG	TCC	CAT	1	4.99	0	0	0	0	0	100
TAGCTAATGTCGCAT	ATG	TCG	CAT	1	4.99	0	0	0	0	0	100
ATGCGCATGTCGCAC	ATG	TCG	CAC	1	4.99	0	0	0	0	0	100
GAAAACATGAGTCAC	ATG	AGT	CAC	1	4.99	0	0	0	0	0	100
GTTCTTATGAGCCAG	ATG	AGC	CAG	1	4.99	0	0	0	0	0	100
TGCGGGATGACGCAC	ATG	ACG	CAC	34	4.28	29.976	3.25541	15.4905	26.1525	17.4787	7.64693
ACTGTCATGTCCCAC	ATG	TCC	CAC	1	4.99	0	0	0	0	0	100
CCTGCGATGAGCCAC	ATG	AGC	CAC	1	4.99	0	0	0	0	0	100
TACCATATGTCACAC	ATG	TCA	CAC	1	4.99	0	0	0	0	0	100
CGCATAATGAGTCAT	ATG	AGT	CAT	1	4.99	0	0	0	0	0	100
CGCATAATGAGTCAC	ATG	AGT	CAC	1	4.99	0	0	0	0	0	100
CATTTCATGTCCCAT	ATG	TCC	CAT	1	4.99	0	0	0	0	0	100
GAGACAATGAGCCAC	ATG	AGC	CAC	1	4.99	0	0	0	0	0	100
TAGGGGATGTCACAC	ATG	TCA	CAC	1	4.99	0	0	0	0	0	100
ACGTAAATGTCCCAC	ATG	TCC	CAC	1	4.99	0	0	0	0	0	100
TATCATATGAGCCAC	ATG	AGC	CAC	1	4.99	0	0	0	0	0	100
TCACTGATGACTCAT	ATG	ACT	CAT	39	4.65	1.4472	2.36959	4.50064	26.638	48.362	16.6826
TTAGTTATGACTCAC	ATG	ACT	CAC	21	4.25	0	35.7895	42.6165	21.594	0	0
ACGCCGATGTCGCAC	ATG	TCG	CAC	1	4.99	0	0	0	0	0	100
TCGAGAATGCGTCAC	ATG	CGT	CAC	36	4.04	60.3094	11.3112	7.17728	6.06137	12.1735	2.96728
ATTCTTATGAGCCAC	ATG	AGC	CAC	1	4.99	0	0	0	0	0	100
ATTGAAATGTCGCAT	ATG	TCG	CAT	1	4.99	0	0	0	0	0	100
GCCGCCATGAGCCAC	ATG	AGC	CAC	1	4.99	0	0	0	0	0	100
GACTGTATGTCCCAC	ATG	TCC	CAC	1	4.99	0	0	0	0	0	100
CGAACGATGAGCCAT	ATG	AGC	CAT	1	4.99	0	0	0	0	0	100
TGAGATATGTCACAC	ATG	TCA	CAC	1	4.99	0	0	0	0	0	100
CGCGAAATGAGCCAC	ATG	AGC	CAC	1	4.99	0	0	0	0	0	100
CCGTAAATGTCTCAT	ATG	TCT	CAT	1	4.99	0	0	0	0	0	100
CCGTAAATGTCTCAC	ATG	TCT	CAC	1	4.99	0	0	0	0	0	100
ACGCGTATGAGCCAT	ATG	AGC	CAT	1	4.99	0	0	0	0	0	100
TTCGGAATGACCCAC	ATG	ACC	CAC	41	4.34	1.48233	12.1192	55.3999	15.5889	7.81886	7.59081
AGCAAAATGTCTCAT	ATG	TCT	CAT	1	4.99	0	0	0	0	0	100
TCACCTATGAGCCAT	ATG	AGC	CAT	1	4.99	0	0	0	0	0	100
GTGAGAATGTCCCAC	ATG	TCC	CAC	1	4.99	0	0	0	0	0	100
GTTGACATGTCACAT	ATG	TCA	CAT	1	4.99	0	0	0	0	0	100
GCTAAAATGAGCCAC	ATG	AGC	CAC	1	4.99	0	0	0	0	0	100
TGAAGGATGAGTCAG	ATG	AGT	CAG	1	4.99	0	0	0	0	0	100
TTGCCGATGTCTCAC	ATG	TCT	CAC	1	4.99	0	0	0	0	0	100
ACTGGAATGTCGCAC	ATG	TCG	CAC	1	4.99	0	0	0	0	0	100
TGACTCATGTCGCAC	ATG	TCG	CAC	1	4.99	0	0	0	0	0	100
CCTGTTATGAGTCAC	ATG	AGT	CAC	1	4.99	0	0	0	0	0	100
ACATTGATGTCTCAT	ATG	TCT	CAT	1	4.99	0	0	0	0	0	100
TACCATATGTCGCAC	ATG	TCG	CAC	1	4.99	0	0	0	0	0	100
CTTGACATGACTCAC	ATG	ACT	CAC	39	4.32	1.49597	24.4452	41.9365	19.6778	10.5211	1.92339
ATGCCTATGAGTCAC	ATG	AGT	CAC	1	4.99	0	0	0	0	0	100
GATGCCATGTCCCAG	ATG	TCC	CAG	1	4.99	0	0	0	0	0	100
CGGCTTATGTCACAT	ATG	TCA	CAT	1	4.99	0	0	0	0	0	100
GCACGCATGTCACAC	ATG	TCA	CAC	1	4.99	0	0	0	0	0	100
CTACACATGTCCCAT	ATG	TCC	CAT	1	4.99	0	0	0	0	0	100
CTACACATGTCCCAC	ATG	TCC	CAC	1	4.99	0	0	0	0	0	100
GAAGGGATGACTCAT	ATG	ACT	CAT	30	4.13	35.8599	23.3142	14.8197	18.7663	4.18191	3.05802
AGCCGCATGTGTCAT	ATG	TGT	CAT	35	4.24	0	25.174	61.317	13.5089	0	0
CTAGAAATGTCCCAT	ATG	TCC	CAT	1	4.99	0	0	0	0	0	100
TTCTGAATGACTCAC	ATG	ACT	CAC	42	4.36	1.21285	9.91603	28.3353	51.0329	6.39744	3.10542
GCTGCGATGACCCAT	ATG	ACC	CAT	42	4.54	1.28695	4.20025	12.0209	43.9966	20.3649	18.1304
TGCATGATGTCCCAC	ATG	TCC	CAC	1	4.99	0	0	0	0	0	100
AGAACAATGTCACAT	ATG	TCA	CAT	1	4.99	0	0	0	0	0	100
CACAGTATGAGTCAT	ATG	AGT	CAT	1	4.99	0	0	0	0	0	100
CACAGTATGAGTCAC	ATG	AGT	CAC	1	4.99	0	0	0	0	0	100
AAGGTAATGAGCCAC	ATG	AGC	CAC	1	4.99	0	0	0	0	0	100
TGAGACATGTCTCAT	ATG	TCT	CAT	1	4.99	0	0	0	0	0	100
ACAAGAATGAGCCAT	ATG	AGC	CAT	1	4.99	0	0	0	0	0	100
TGGTAGATGAGTCGT	ATG	AGT	CGT	1	4.99	0	0	0	0	0	100
CAGATTATGAGCCAT	ATG	AGC	CAT	1	4.99	0	0	0	0	0	100
TGTAGCATGTCCCAC	ATG	TCC	CAC	1	4.99	0	0	0	0	0	100
AGGTAGATGTCCCAC	ATG	TCC	CAC	1	4.99	0	0	0	0	0	100
ACGGCTATGTCCCAC	ATG	TCC	CAC	1	4.99	0	0	0	0	0	100
AGTTCCATGAGCCAT	ATG	AGC	CAT	1	4.99	0	0	0	0	0	100
CTATGCATGTCGCAT	ATG	TCG	CAT	1	4.99	0	0	0	0	0	100
CCATGAATGTCACAT	ATG	TCA	CAT	1	4.99	0	0	0	0	0	100
TGGTTCATGTCACAC	ATG	TCA	CAC	1	4.99	0	0	0	0	0	100
GACTTTATGAGCCAC	ATG	AGC	CAC	1	4.99	0	0	0	0	0	100
GATGAAATGTCGCAC	ATG	TCG	CAC	1	4.99	0	0	0	0	0	100
ACCAATATGAGTCAT	ATG	AGT	CAT	1	4.99	0	0	0	0	0	100
TGAGCAATGAGTCGT	ATG	AGT	CGT	1	4.99	0	0	0	0	0	100
TTGGCCATGTCCCAC	ATG	TCC	CAC	1	4.99	0	0	0	0	0	100
CGTAAAATGAGCCAT	ATG	AGC	CAT	1	4.99	0	0	0	0	0	100
CCAAGCATGTCGCAT	ATG	TCG	CAT	1	4.99	0	0	0	0	0	100
CTACTGATGTCACAC	ATG	TCA	CAC	1	4.99	0	0	0	0	0	100
ATAGTAATGACTCAC	ATG	ACT	CAC	27	4.34	9.18905	41.0746	10.6703	12.0261	24.1024	2.93748
GCTACCATGAGCCAC	ATG	AGC	CAC	1	4.99	0	0	0	0	0	100
GCTACCATGAGCCAT	ATG	AGC	CAT	1	4.99	0	0	0	0	0	100
GCTGTTATGTCACAC	ATG	TCA	CAC	1	4.99	0	0	0	0	0	100
CTGAAGATGTCTCAC	ATG	TCT	CAC	1	4.99	0	0	0	0	0	100
CAATATATGAGCCAT	ATG	AGC	CAT	1	4.99	0	0	0	0	0	100
TACATCATGTCCCAT	ATG	TCC	CAT	1	4.99	0	0	0	0	0	100
TAGGTCATGTCGCAC	ATG	TCG	CAC	1	4.99	0	0	0	0	0	100
GGGGTAATGACTCAT	ATG	ACT	CAT	29	4.28	10.7051	38.3228	16.6081	22.4174	3.74795	8.19864
AGGGGAATGACTCAC	ATG	ACT	CAC	35	4.45	1.58206	5.16342	27.1036	41.6029	8.34492	16.2031
GCGCCCATGTCCCAC	ATG	TCC	CAC	1	4.99	0	0	0	0	0	100
ATATGGATGTCGCAC	ATG	TCG	CAC	1	4.99	0	0	0	0	0	100
ACTTGGATGTCACAC	ATG	TCA	CAC	1	4.99	0	0	0	0	0	100
CATCTCATGTCTCAC	ATG	TCT	CAC	1	4.99	0	0	0	0	0	100
CAGTTTATGAGCCGT	ATG	AGC	CGT	1	4.99	0	0	0	0	0	100
AGGTAGATGTCTCAT	ATG	TCT	CAT	1	4.99	0	0	0	0	0	100
TTACGTATGAGTCAT	ATG	AGT	CAT	1	4.99	0	0	0	0	0	100
ACAGTGATGACGCAT	ATG	ACG	CAT	26	4.61	0	0	3.11951	47.3199	31.6344	17.9262
CTCTGCATGTCACAC	ATG	TCA	CAC	1	4.99	0	0	0	0	0	100
GCTCCAATGTCGCAC	ATG	TCG	CAC	1	4.99	0	0	0	0	0	100
TCGAGCATGTCCCAT	ATG	TCC	CAT	1	4.99	0	0	0	0	0	100
GTTGCCATGAGTCAC	ATG	AGT	CAC	1	4.99	0	0	0	0	0	100
ATTCCGATGTCGCAT	ATG	TCG	CAT	1	4.99	0	0	0	0	0	100
GAGGTCATGAGCCAC	ATG	AGC	CAC	1	4.99	0	0	0	0	0	100
GAGGTCATGAGCCAT	ATG	AGC	CAT	1	4.99	0	0	0	0	0	100
CCGGACATGAGTCAT	ATG	AGT	CAT	1	4.99	0	0	0	0	0	100
TCTGGAATGAGCCAC	ATG	AGC	CAC	1	4.99	0	0	0	0	0	100
GAGAACATGTCACAT	ATG	TCA	CAT	1	4.99	0	0	0	0	0	100
CATAATATGTCCCAC	ATG	TCC	CAC	1	4.99	0	0	0	0	0	100
GGAGTTATGTCGGAT	ATG	TCG	GAT	1	4.99	0	0	0	0	0	100
AGGTGCATGACTCAC	ATG	ACT	CAC	21	4.22	36.3571	16.1185	0	25.9487	17.3473	4.22841
TCAGAAATGTCGCAC	ATG	TCG	CAC	1	4.99	0	0	0	0	0	100
AGAGTCATGAGTCAT	ATG	AGT	CAT	1	4.99	0	0	0	0	0	100
TTGTATATGTCGCCT	ATG	TCG	CCT	1	4.99	0	0	0	0	0	100
TTGTCCATGTCTCAT	ATG	TCT	CAT	1	4.99	0	0	0	0	0	100
CCGATTATGAGCCAC	ATG	AGC	CAC	1	4.99	0	0	0	0	0	100
AGGGTCATGACCCAT	ATG	ACC	CAT	34	4.38	0	5.54001	52.8633	22.3279	14.9226	4.3462
CATATTATGTCGCAC	ATG	TCG	CAC	1	4.99	0	0	0	0	0	100
CCTTCGATGTCGCAT	ATG	TCG	CAT	1	4.99	0	0	0	0	0	100
AGAGAGATGACCCAT	ATG	ACC	CAT	33	4.69	0	2.92329	8.33824	18.7758	47.1061	22.8566
TAGCCTATGAGCCAT	ATG	AGC	CAT	1	4.99	0	0	0	0	0	100
GGCATCATGTCACAC	ATG	TCA	CAC	1	4.99	0	0	0	0	0	100
TGTAGTATGAGCCAC	ATG	AGC	CAC	1	4.99	0	0	0	0	0	100
CTTGCAATGAGTCAC	ATG	AGT	CAC	1	4.99	0	0	0	0	0	100
TGGTGCATGTCCCAC	ATG	TCC	CAC	1	4.99	0	0	0	0	0	100
TTTTTGATGTCCCAC	ATG	TCC	CAC	1	4.99	0	0	0	0	0	100
GTGACCATGTCTCAC	ATG	TCT	CAC	1	4.99	0	0	0	0	0	100
CACATCATGAGCCAT	ATG	AGC	CAT	1	4.99	0	0	0	0	0	100
TAGTAGATGAGTCAT	ATG	AGT	CAT	1	4.99	0	0	0	0	0	100
AGGCCGATGAGCCAC	ATG	AGC	CAC	1	4.99	0	0	0	0	0	100
AGGCGGATGTCACAG	ATG	TCA	CAG	1	4.99	0	0	0	0	0	100
CATTGAATGAGCCAT	ATG	AGC	CAT	1	4.99	0	0	0	0	0	100
TATTTTATGTCCCAT	ATG	TCC	CAT	1	4.99	0	0	0	0	0	100
TTACTTATGAGTCAT	ATG	AGT	CAT	1	4.99	0	0	0	0	0	100
GTCGGAATGAGCCAT	ATG	AGC	CAT	1	4.99	0	0	0	0	0	100
GACACGATGTCACAT	ATG	TCA	CAT	1	4.99	0	0	0	0	0	100
TGAACAATGAGCCAC	ATG	AGC	CAC	1	4.99	0	0	0	0	0	100
ACGTGAATGTCTCAT	ATG	TCT	CAT	1	4.99	0	0	0	0	0	100
[truncated: 48,503 more rows]
